# Supplementary material for: PHF19 mediated regulation of proliferation and invasiveness in prostate cancer cells
Source: eLife. 2020 Mar 10;9:e51373. doi: 10.7554/eLife.51373 (PMC7064337; doi:10.7554/eLife.51373)
Supplement: Supplementary file 1. [file elife-51373-supp1.xlsx]

## Sheet: Hoja1
	ChIP	Condition	Number of ChIP peaks	Number of target genes
	PHF19	shCTR	1245	1010	See details in sheet: PHF19 targets
		shPHF19	-	-
	H3K27me3	shCTR	27938	4256	See details in sheet: H3K27me3 targets (shCTR)
		shPHF19	46276	5918	See details in sheet: H3K27me3 targets (shPHF19)
	EZH2	shCTR	600	561	See details in sheet: EZH2 targets (shCTR)
		shPHF19	2659	2084	See details in sheet: EZH2 targets (shPHF19)
	SUZ12	shCTR	46	41	See details in sheet: SUZ12 targets (shCTR)
		shPHF19	600	567	See details in sheet: SUZ12 targets (shPHF19)
	MTF2	shCTR	3849	2011	See details in sheet: MTF2 targets (shCTR)
		shPHF19	4949	2811	See details in sheet: MTF2 targets (shPHF19)

## Sheet: PHF19_targets
List of 1010 genes marked by PHF19 ChIPseq
AAMDC
AARS2
ABCA13
ABCD3
ABHD12B
ABO
ABR
ACADL
ACHE
ACOXL
ADAMTS12
ADAMTS16
ADAMTS6
ADAMTS8
ADAMTS9
ADAMTS9-AS2
ADCY8
ADCYAP1
ADGRA1
ADGRA1-AS1
ADGRV1
ADM
ADRA1A
AGAP2
ALK
ALKAL1
ALMS1P1
ALOX5
ALX1
ALX4
AMH
AMN
AMOTL1
AMPH
ANK3
ANKRD11
ANKRD19P
ANKRD60
ANO1
ANO2
APC2
APCDD1
ARHGAP9
ARHGEF40
ARHGEF7
ARHGEF7-AS2
ARID3C
ARX
ASCL4
ATF3
ATL1
ATP2B1-AS1
ATP2C2
ATP6V0A2
ATP6V1C2
ATP8A1
B4GALNT2
BAALC
BAALC-AS2
BACH2
BAMBI
BARHL1
BARX1
BARX1-AS1
BARX2
BCAT1
BCL11A
BCL11B
BCL2
BEGAIN
BHLHE41
BICDL2
BLACAT1
BMI1
BMP2
BMP4
BMP6
BMPR1B
BMPR1B-AS1
BMS1P21
BNC1
BNC2
BSPRY
BSX
BTNL9
C11orf63
C11orf96
C14orf37
C15orf59
C17orf58
C1QTNF2
C1orf61
C20orf166-AS1
C21orf91
C2CD4A
C2CD4C
C3orf70
C4orf19
CA4
CABP1
CABP7
CACNA1B
CACNA1G
CACNA1G-AS1
CACNA2D1
CACNB4
CACNG2
CACNG4
CALD1
CAMK2B
CAND1.11
CASC15
CASC23
CASQ1
CATSPERZ
CBX2
CBX4
CBX8
CCDC140
CCDC177
CCDC39
CCDC40
CCDC85A
CCK
CCNA1
CCND2
CCND2-AS1
CDC20B
CDC42EP5
CDH22
CDH23
CDK5R2
CDK6
CDKL3
CDS1
CEACAM21
CECR2
CELF4
CFAP46
CFAP53
CFAP65
CFAP77
CH25H
CHCHD7
CHD5
CHRD
CHRNA3
CHRNA7
CHST2
CHST8
CIITA
CITED1
CLDN10
CLIC5
CLIC6
CLVS1
CNPY1
CNR1
CNTD2
COL15A1
COL19A1
COL24A1
COL2A1
COL4A1
COL4A2
COL8A1
COL9A3
COLEC12
COMMD3-BMI1
COMP
CR2
CRABP1
CREB5
CRHR1
CRLF1
CRNDE
CRTAC1
CTD-2297D10.2
CUX2
CXCL14
CXCR4
CXXC5
CYP19A1
CYP24A1
CYP26A1
CYP26B1
CYP26C1
DAB2
DACT1
DBX1
DCAF5
DCDC2
DERL1
DGCR8
DGKG
DGKI
DHH
DIGIT
DKFZP434H168
DKFZp686K1684
DLL1
DLL4
DLX1
DLX3
DLX6-AS1
DNAH10
DNAJC22
DNER
DOC2B
DOCK1
DPF3
DPYD
DPYSL5
DRAXIN
DSP
DTX4
DUOX2
DUOXA2
DUSP15
DUSP4
DUSP6
EBF1
EBF2
EDARADD
EDIL3
EFHD1
EFNA3
EFNB2
EGFEM1P
EGFLAM
EGLN3
EGR2
EGR3
EGR4
EMILIN2
EMX1
EMX2
EMX2OS
EN2
ENDOV
EPAS1
EPB41L4A
EPB41L4A-AS2
EPOP
ERBB4
ESM1
ESR1
ESRP1
ESRRB
ESRRG
EYA1
EYA4
FAM120B
FAM131B
FAM13C
FAM151B
FAM159B
FAM189A1
FAM196A
FAM20A
FAM47E
FAM47E-STBD1
FBLN5
FBN3
FBXL16
FDXR
FENDRR
FEZF1-AS1
FEZF2
FGF11
FGF18
FGF8
FGF9
FGFR2
FGFR3
FLRT2
FLT3
FLT4
FNDC1
FOXA2
FOXB1
FOXB2
FOXC1
FOXCUT
FOXE1
FOXF1
FOXF2
FOXG1-AS1
FOXI3
FOXL2
FOXL2NB
FOXN4
FOXP1
FOXP2
FOXQ1
FRMD4A
FRMD4B
FRMPD1
FSCN2
FST
FSTL1
FSTL4
FUS
FXYD6
FXYD6-FXYD2
FZD8
GAB2
GABBR2
GADL1
GALNT3
GALR2
GATA3
GATA3-AS1
GATA4
GATA5
GATA6
GATA6-AS1
GBX1
GDF7
GFI1
GGTA1P
GJA1
GJA3
GJB2
GJB6
GJC3
GJD2
GLI3
GLI4
GMDS
GNA14
GNAO1
GPHN
GPR137B
GRB10
GRHL2
GRID1
GRIK5
GRIN2C
GRIN2D
GRK5
GRM4
GRM8
GS1-24F4.2
GSC
GSE1
GSPT2
GSX2
GUCY1A2
GXYLT2
HAND1
HAP1
HAR1A
HAR1B
HAS2
HAS2-AS1
HCN4
HELT
HES2
HES3
HEY1
HEY2
HIC1
HIST1H3I
HIST1H4L
HIVEP1
HMCN1
HMCN2
HMX1
HNF4G
HOMER1
HOXB8
HOXD11
HOXD12
HOXD13
HPGD
HPSE2
HRAT92
HRK
HS3ST6
HS6ST3
HTR1F
HTR7
HUNK
HYMAI
ICOSLG
ID4
IGDCC3
IGF1R
IGF2
IGF2-AS
IGF2BP1
IGF2BP3
IGFBP3
IGFBP5
IGSF11
IHH
IKZF3
IL17D
IL20RA
IL7
ILDR2
INHBB
INS-IGF2
INSM2
IQSEC2
IRAIN
IRF8
IRX3
IRX4
IRX5
ISL2
ISLR2
ISM1
ITGA1
ITGB8
ITIH5
JAG1
JAM2
JSRP1
KAAG1
KALRN
KANK4
KANSL1L
KCNH2
KCNIP1
KCNJ2
KCNJ2-AS1
KCNJ4
KCNK12
KCNK13
KCNK4
KCNK4-TEX40
KCNMB4
KCNN1
KCNQ2
KCNQ3
KCTD1
KCTD16
KDM4B
KIF1A
KIF26A
KLF7
KLHL35
KLK10
KLK4
LAD1
LBH
LBX1
LBX1-AS1
LDLRAD4
LEF1
LEF1-AS1
LGI3
LGR5
LGR6
LHX2
LHX3
LHX4
LHX5
LHX6
LHX9
LINC00092
LINC00554
LINC00609
LINC00673
LINC00917
LINC01006
LINC01024
LINC01081
LINC01082
LINC01116
LINC01117
LINC01143
LINC01210
LINC01237
LINC01276
LINC01314
LINC01391
LINC01397
LINC01412
LINC01475
LINC01500
LINC01607
LINC01686
LINC01798
LINC01973
LINC02036
LINC02102
LINC02112
LINC02121
LINC02202
LINC02210-CRHR1
LINGO1
LIPG
LKAAEAR1
LMO1
LMO2
LMOD1
LMX1B
LOC100126784
LOC100128770
LOC100129203
LOC100129434
LOC100132215
LOC100288748
LOC100294362
LOC100505588
LOC101927248
LOC101927437
LOC101927497
LOC101927811
LOC101927817
LOC101927870
LOC101928174
LOC101928370
LOC101929076
LOC101929122
LOC101929234
LOC101929524
LOC101929748
LOC102723313
LOC102723373
LOC105373021
LOC105373656
LOC105377716
LOC145845
LOC283731
LOC283856
LOC389332
LOC400706
LOC440461
LOC643802
LOC646548
LOC728739
LOC729870
LOR
LOX
LPL
LRP1B
LRP2
LRP4
LRRC10B
LRRC71
LRRIQ4
LTK
LYPD1
LZTS3
MACF1
MAD2L2
MAEL
MAFA
MAGI2
MAK
MAL2
MAML3
MAN1A1
MAN1C1
MAP6
MAP7
MAPK4
MARCH9
MARCKS
MARVELD2
MAT2B
MATK
MBD1
MBNL3
MCC
MCF2L2
MCTP1
MECOM
MEF2C
MEF2C-AS1
MEG8
MEIS3
METAP1D
MIAT
MIR1-1HG
MIR1234
MIR124-3
MIR1268A
MIR129-2
MIR137
MIR137HG
MIR148A
MIR155HG
MIR17HG
MIR200B
MIR203A
MIR203B
MIR2682
MIR3131
MIR3663HG
MIR3665
MIR3681HG
MIR4321
MIR4488
MIR4526
MIR4634
MIR4683
MIR4734
MIR548G
MIR6720
MIR6841
MIR7845
MKX
MKX-AS1
MLLT6
MLPH
MLXIPL
MMAB
MMP25
MMP28
MNX1
MSX1
MSX2
MSX2P1
MT1A
MTUS1
MYB
MYH11
MYO10
MYO5B
MYO6
MYOCD
NALT1
NAT16
NAV2
NBPF10
NBPF20
NBPF25P
NCKAP5
NDNF
NDRG2
NDRG4
NDUFA4L2
NDUFB8
NEDD9
NEFL
NEIL1
NELL2
NEUROD1
NEUROD2
NEUROG2
NEUROG3
NFATC2
NFE2L3
NFIL3
NGFR
NID2
NIM1K
NKD1
NKX1-2
NKX2-2
NKX2-3
NKX2-5
NLGN1
NOL4
NOTCH1
NOTO
NOTUM
NPAS1
NPAS3
NPL
NPNT
NPR1
NPTX1
NR2F1
NR2F1-AS1
NR3C2
NREP
NRG3
NRN1
NRP2
NRXN2
NSG1
NTN4
NTNG2
NTSR1
OLIG1
OLIG2
OLIG3
ONECUT2
ONECUT3
OPRD1
OPRL1
OSBPL1A
OSR2
OSTM1-AS1
OTOP3
OTP
OTX1
OTX2
OTX2-AS1
OVOL1
OVOL1-AS1
OVOL2
PALM2
PAPPA
PARM1
PAX2
PAX4
PAX5
PAX6
PAX7
PAX9
PBX1
PCBP3
PCDH1
PCSK9
PDE3A
PDE4D
PDGFA
PDGFRA
PDZD2
PELI2
PELO
PERP
PEX5L
PGBD5
PGR
PGR-AS1
PHACTR1
PHF21B
PHOX2B
PIP5K1B
PITX2
PKIB
PKNOX2
PKNOX2-AS1
PLA2G7
PLAC9
PLAG1
PLAGL1
PLCH1
PLUT
PLXNA2
PLXNA4
POMC
POU3F2
POU4F1
PP7080
PPARGC1A
PPM1N
PPP2R2C
PPP4R1L
PRDM1
PRDM12
PRDM13
PRDM6
PRELID3A
PRKAG2
PRKG1
PROK2
PROKR1
PROM1
PROX1
PROX1-AS1
PRR15
PRR5L
PRRT4
PRUNE2
PSD2
PSD2-AS1
PTENP1
PTENP1-AS
PTH1R
PTH2
PTK7
PTPN21
PTPN3
PTPRN2
PTPRU
PTPRZ1
PVALB
RAB37
RAB3C
RAD17
RAD21L1
RAD51B
RAP1GAP
RARB
RASGEF1B
RASL10A
RASSF10
RBM20
RBP4
RCC2
RELN
RETREG1
RFLNA
RFX6
RGCC
RGMA
RGS6
RHBDL3
RIC3
RIPK4
RIPOR2
RNF128
RNF182
RNF213
RNF219-AS1
RNF39
ROBO3
RORA
RORA-AS1
RPH3A
RSF1
RSPO1
RSPO3
RSRC1
RTKN2
RTN1
RTN2
RTN4RL1
RTN4RL2
RUNX1
RUNX1T1
RUNX2
S1PR1
SAMD11
SATB1
SBF2
SBSPON
SCIN
SCN3B
SCNN1G
SCRT1
SCUBE3
SDK2
SELENOV
SEMA5B
SEMA6C
SESN3
SHC3
SHC4
SHE
SHH
SHISA3
SHOX2
SIDT1
SIM2
SKOR1
SLAIN1
SLC15A1
SLC16A12
SLC1A2
SLC1A3
SLC22A31
SLC25A48
SLC26A4
SLC26A4-AS1
SLC26A5
SLC30A2
SLC30A3
SLC34A2
SLC35D3
SLC40A1
SLC6A20
SLC6A3
SLC6A4
SLC7A2
SLC8A3
SLC9A3
SLC9A3-AS1
SLFN11
SMIM24
SMPD3
SMTNL2
SNAI3
SNAI3-AS1
SNAPC2
SNCAIP
SNORA89
SNORA99
SNTB1
SORCS2
SOX18
SOX2
SOX2-OT
SOX21
SOX21-AS1
SOX5
SOX7
SOX9
SOX9-AS1
SP6
SP8
SRCIN1
SRD5A2
SRGAP2-AS1
SRP68
SRRM3
SSBP2
SSTR2
ST14
ST6GALNAC2
ST8SIA4
STK3
STMND1
STUM
STXBP5L
SULF2
SUN1
SUSD4
SV2B
SV2C
SVEP1
SYK
SYNDIG1L
SYNE1
SYPL2
SYT2
TACC2
TBC1D16
TBR1
TBX1
TBX2
TBX2-AS1
TC2N
TCF7L2
TCHH
TCTE1
TDH
TDRD10
TEKT1
TEKT3
TENM2
TEX22
TGFBR3L
THBS4
THPO
THRB
THRB-AS1
TJP1
TLL2
TLX2
TMED3
TMEFF2
TMEM178A
TMEM178B
TMEM229A
TMEM255A
TMEM255B
TMEM30B
TMEM59L
TMEM74
TMOD1
TMPRSS2
TNXB
TRANK1
TRH
TRIB2
TRIM31
TRIM31-AS1
TRIM36
TSHZ1
TSPEAR
TTC9B
TTLL11
TTLL9
TUBB2B
TXNIP
UBASH3A
ULBP2
UNC5B
UNC5B-AS1
UNCX
VAX1
VCAN
VGLL2
VSNL1
VSX1
VWA2
VWA5B2
WDR86
WDR86-AS1
WFDC2
WIF1
WNT1
WNT16
WNT3A
WNT6
WNT7A
WTIP
XKR5
XKR6
YBEY
YPEL4
ZACN
ZADH2
ZBTB16
ZBTB7C
ZDHHC22
ZEB2
ZEB2-AS1
ZFHX4
ZFHX4-AS1
ZFPM1
ZIC2
ZIC5
ZNF423
ZNF503
ZNF503-AS2
ZNF519
ZNF704
ZNF800
ZNF831

## Sheet: H3K27me3 targets (shCTR)
List of 4256 genes marked by H3K27me3 ChIPseq in control conditions (shCTR)
A1CF
A2M
A2MP1
AAMDC
AARD
AARS2
AATK
AATK-AS1
ABAT
ABCA13
ABCB4
ABCC12
ABCC8
ABCG1
ABCG5
ABCG8
ABHD12B
ABHD16B
ABLIM1
ABLIM2
ABO
ABR
ACADL
ACAN
ACAP1
ACE
ACHE
ACKR1
ACKR3
ACOXL
ACR
ACSBG2
ACSF3
ACSL6
ACSM1
ACSM4
ACSS1
ACTA1
ACTN2
ACVR1B
ACVR1C
ADA2
ADAM21P1
ADAM33
ADAMTS12
ADAMTS14
ADAMTS16
ADAMTS19
ADAMTS19-AS1
ADAMTS2
ADAMTS3
ADAMTS6
ADAMTS7
ADAMTS8
ADAMTS9
ADAMTS9-AS2
ADAMTSL1
ADAMTSL2
ADAMTSL3
ADAP1
ADAR
ADARB2
ADCY2
ADCY4
ADCY5
ADCY8
ADCYAP1
ADCYAP1R1
ADGRA1
ADGRA1-AS1
ADGRA2
ADGRB1
ADGRE1
ADGRE3
ADGRE4P
ADGRG3
ADGRV1
ADM
ADORA3
ADRA1A
ADRA1D
ADRA2A
ADRA2C
AFF3
AFM
AFP
AGAP2
AGXT2
AHRR
AHSP
AICDA
AIF1L
AIM2
AIRE
AK5
AK8
AKAP3
AKAP6
AKT2
ALDH1A1
ALDH1A2
ALDH1L1
ALDOB
ALK
ALKAL1
ALKAL2
ALKBH3
ALLC
ALMS1
ALMS1P1
ALOX12B
ALOX12P2
ALOX15
ALOX15P1
ALOX5
ALX1
ALX3
ALX4
AMBP
AMER2
AMER3
AMH
AMMECR1
AMN
AMPD1
AMPH
AMZ1
ANGPT1
ANK1
ANK3
ANKDD1A
ANKFN1
ANKK1
ANKRD18CP
ANKRD18DP
ANKRD19P
ANKRD20A19P
ANKRD26P1
ANKRD27
ANKRD34B
ANKRD34C
ANKRD34C-AS1
ANKRD35
ANKRD53
ANKRD60
ANKRD62
ANKRD66
ANKS1B
ANO1
ANO1-AS2
ANO2
ANO9
ANP32D
AOC1
AP1M2
AP3B2
APBA1
APBB1IP
APC2
APCDD1
APLNR
APLP1
APRT
AQP9
ARC
ARFGEF3
ARHGAP15
ARHGAP19-SLIT1
ARHGAP20
ARHGAP40
ARHGAP44
ARHGAP9
ARHGDIG
ARHGEF11
ARHGEF4
ARHGEF40
ARHGEF6
ARHGEF7
ARHGEF7-AS1
ARHGEF7-AS2
ARID3C
ARID5B
ARL14EP
ARMC4P1
ARMCX2
ARNT2
ARSG
ARX
ASAH2
ASB18
ASCL1
ASCL2
ASCL4
ASIC3
ASIC4
ASPG
ASPHD2
ASTN1
ASTN2
ASXL2
ATCAY
ATF3
ATG14
ATL1
ATP12A
ATP1A3
ATP1B2
ATP2A3
ATP2B2
ATP2C2
ATP4B
ATP6V0A2
ATP6V1B1
ATP6V1B2
ATP6V1C2
ATP8A1
ATP8A2
ATRNL1
ATXN7L2
AVPR1A
AVPR1B
AXDND1
AXIN2
AZGP1
B3GALT1
B3GAT2
B3GNT4
B3GNT7
B4GALNT1
B4GALNT4
BAALC
BAALC-AS2
BACE2
BACH2
BAHD1
BAIAP2L2
BAIAP3
BAMBI
BARHL1
BARHL2
BARX1
BARX1-AS1
BARX2
BBOX1-AS1
BCAN
BCAS1
BCL11A
BCL11B
BCL2
BCL9
BECN1
BEGAIN
BEND2
BEND4
BEND7
BEX5
BGLT3
BHLHE23
BHLHE41
BICDL1
BICDL2
BLACAT1
BLACE
BLOC1S5-TXNDC5
BLVRB
BMP2
BMP3
BMP4
BMP6
BMP7
BMPR1B
BMPR1B-AS1
BMS1P21
BNC2
BOD1L2
BPI
BPIFA1
BPIFA2
BPIFA3
BPIFA4P
BPIFB2
BPIFB3
BPIFB4
BPIFB6
BPIFC
BRCAT54
BRD3
BRS3
BRSK2
BSN
BSN-AS2
BSPH1
BSPRY
BSX
BTBD17
BTBD3
BTNL10
BTNL2
BTNL3
BTNL8
BTNL9
C10orf128
C10orf53
C11orf40
C11orf53
C11orf63
C11orf74
C11orf87
C11orf96
C12orf42
C12orf54
C14orf105
C14orf166
C14orf37
C15orf59
C16orf89
C17orf100
C18orf63
C19orf25
C19orf73
C1QA
C1QB
C1QTNF1
C1QTNF1-AS1
C1QTNF2
C1QTNF4
C1QTNF8
C1orf168
C1orf194
C1orf61
C1orf68
C1orf74
C1orf87
C20orf166-AS1
C20orf194
C20orf202
C21orf2
C21orf33
C2CD4A
C2CD4B
C2CD4C
C2CD4D
C2CD6
C2orf70
C2orf91
C3P1
C3orf20
C3orf22
C3orf70
C4orf19
C4orf22
C5orf49
C5orf51
C5orf58
C5orf64
C5orf66
C5orf66-AS1
C5orf67
C6
C6orf10
C7
C7orf33
C7orf57
C7orf77
C8orf31
C8orf33
C8orf37-AS1
C8orf89
C9
C9orf135
C9orf24
C9orf47
C9orf66
C9orf72
CA12
CA4
CA7
CA8
CABP1
CABP5
CABP7
CACNA1A
CACNA1B
CACNA1C
CACNA1C-AS1
CACNA1C-IT2
CACNA1D
CACNA1E
CACNA1G
CACNA1G-AS1
CACNA1H
CACNA1I
CACNA2D1
CACNA2D2
CACNA2D3
CACNA2D4
CACNB2
CACNB3
CACNB4
CACNG2
CACNG4
CACNG5
CACNG7
CACNG8
CADM1
CADM3
CADM3-AS1
CADM4
CADPS
CALB1
CALB2
CALCOCO1
CALCR
CALD1
CALY
CAMK1G
CAMK2B
CAMK2N2
CAMK4
CAMKV
CAMSAP3
CAMTA1
CAND1.11
CAPN13
CAPN14
CAPN8
CAPSL
CARD11
CARD6
CARMIL2
CARTPT
CASC1
CASC11
CASC15
CASC18
CASC2
CASC21
CASC23
CASC8
CASKIN1
CASP14
CASR
CATSPERB
CATSPERG
CATSPERZ
CBFA2T3
CBX2
CBX4
CBX7
CBX8
CCAT2
CCDC129
CCDC136
CCDC140
CCDC149
CCDC15
CCDC152
CCDC168
CCDC177
CCDC182
CCDC183
CCDC184
CCDC185
CCDC192
CCDC26
CCDC27
CCDC3
CCDC33
CCDC39
CCDC40
CCDC78
CCDC85A
CCEPR
CCK
CCKAR
CCKBR
CCL18
CCL23
CCM2L
CCNA1
CCND2
CCND2-AS1
CCND3
CCR2
CCR3
CCR5
CCR6
CCT6B
CD163
CD163L1
CD1A
CD1D
CD207
CD209
CD300E
CD300LB
CD300LF
CD33
CD34
CD3D
CD3E
CD3G
CD40
CD5L
CD6
CD84
CDC20B
CDC37
CDC42EP5
CDH1
CDH12
CDH13
CDH15
CDH17
CDH20
CDH22
CDH23
CDH6
CDHR1
CDK4
CDK5R2
CDK6
CDS1
CDX2
CEACAM20
CEACAM21
CEACAM4
CEACAM5
CEACAM6
CEACAM7
CEACAM8
CEBPA
CEBPA-AS1
CECR2
CECR6
CELF3
CELF4
CELF5
CELF6
CEMIP
CEND1
CEP162
CEP295
CERS3
CFAP206
CFAP43
CFAP46
CFAP54
CFAP58
CFAP58-AS1
CFAP61
CFAP65
CFAP70
CFAP73
CFAP77
CFAP99
CFTR
CGA
CHAT
CHCHD7
CHD5
CHGA
CHGB
CHIA
CHIT1
CHL1
CHL1-AS2
CHMP2B
CHMP6
CHODL-AS1
CHP2
CHRD
CHRDL2
CHRM1
CHRM4
CHRNA2
CHRNA3
CHRNA4
CHRNA7
CHRNB2
CHRND
CHRNE
CHST1
CHST13
CHST4
CHST8
CHSY3
CHURC1-FNTB
CIB4
CIITA
CILP2
CISTR
CITED1
CLC
CLCN1
CLDN10
CLDN10-AS1
CLDN12
CLDN14
CLDN5
CLDN7
CLEC2L
CLEC4D
CLEC4E
CLEC4F
CLEC4G
CLEC4GP1
CLEC4M
CLEC6A
CLIC5
CLIC6
CLPSL1
CLSTN2
CLUL1
CLVS1
CMKLR1
CMPK2
CMTR2
CMYA5
CNDP1
CNGA3
CNGB3
CNIH3
CNKSR2
CNNM1
CNPY1
CNR1
CNRIP1
CNTD2
CNTFR
CNTFR-AS1
CNTN2
CNTN5
CNTNAP2
COG2
COL11A2
COL14A1
COL15A1
COL19A1
COL20A1
COL24A1
COL25A1
COL26A1
COL27A1
COL2A1
COL4A1
COL4A2
COL4A3
COL4A4
COL4A6
COL5A3
COL6A3
COL6A4P2
COL6A5
COL6A6
COL8A1
COL8A2
COL9A1
COL9A3
COLCA1
COLCA2
COLEC10
COLEC12
COMP
CORIN
CORO6
COX6C
CPA6
CPAMD8
CPEB1
CPEB1-AS1
CPED1
CPLX1
CPLX2
CPLX4
CPNE4
CPNE5
CPNE9
CPXM2
CPZ
CR1
CR1L
CR2
CRABP1
CRB2
CRCT1
CREB3L3
CREB5
CREG2
CRH
CRHBP
CRHR1
CRHR2
CRIP2
CRLF1
CRMP1
CRNDE
CRNN
CRTAC1
CRTAM
CRY2
CRYBA2
CRYBB2
CRYL1
CRYM
CSF2RB
CSMD2
CSNK1A1L
CSTF2T
CTCFL
CTD-2194D22.4
CTD-2270F17.1
CTD-2297D10.2
CTNNA3
CTNNBL1
CTNND2
CTTNBP2
CTXN2
CUX2
CWF19L2
CWH43
CX3CR1
CXCL14
CXCL16
CXCR1
CXCR4
CXXC4
CXXC4-AS1
CXXC5
CYB5R2
CYB5R4
CYFIP2
CYP11A1
CYP11B1
CYP11B2
CYP19A1
CYP24A1
CYP26A1
CYP26B1
CYP26C1
CYP2A13
CYP2B6
CYP2C8
CYP2E1
CYP3A4
CYP3A43
CYP3A7
CYP3A7-CYP3A51P
CYP46A1
CYP4B1
CYP4F22
CYP4F24P
CYP4X1
CYP51A1-AS1
CYS1
CYSLTR2
CYYR1
CYYR1-AS1
DAAM1
DAB1
DAB2
DAB2IP
DACT1
DACT3
DACT3-AS1
DAO
DBH
DBH-AS1
DBX1
DBX2
DCAF5
DCD
DCDC1
DCDC2
DCDC2C
DCHS1
DCHS2
DCLK1
DCN
DCTN2
DDAH1
DDC
DDX25
DDX54
DEF6
DEFA11P
DEFA5
DEFB112
DEFB116
DEFB118
DEFB119
DEFB121
DEFB122
DEFB125
DEFB126
DEFB127
DEFB128
DEFB129
DEGS2
DENND2A
DENND2D
DEUP1
DGCR14
DGKG
DGKI
DGKK
DGKZ
DHH
DHRS7B
DIGIT
DIO2
DIO2-AS1
DIO3
DIRAS2
DIRC3
DISC1
DISP3
DKFZP434H168
DKFZp686K1684
DKFZp779M0652
DLG2
DLG3
DLGAP1
DLGAP1-AS4
DLGAP2
DLGAP3
DLGAP4
DLK1
DLK2
DLL1
DLL3
DLL4
DLX1
DLX3
DLX4
DLX5
DLX6
DLX6-AS1
DMBT1
DMBT1P1
DMGDH
DMRTA1
DMRTA2
DMRTC2
DNAH10
DNAH3
DNAH6
DNAH8
DNAI1
DNAJB8
DNAJB8-AS1
DNAJC19
DNAJC22
DNAJC24
DNASE1L2
DNER
DNM3
DNMT3L
DNTT
DOC2A
DOC2B
DOCK1
DOCK2
DOCK3
DOCK8
DOK6
DOK7
DPEP1
DPF1
DPF3
DPH1
DPY19L2P4
DPYD
DPYSL4
DPYSL5
DQX1
DRAXIN
DRD1
DRD2
DRD3
DRGX
DRICH1
DSC3
DSCAML1
DSCR4
DSCR8
DSP
DSPP
DTNA
DTX1
DTX4
DUOX1
DUOX2
DUOXA1
DUOXA2
DUSP15
DUSP26
DUSP27
DUSP3
DUSP4
DUSP8
DUSP9
DYDC2
DYNC1I1
DYNC2LI1
DYSF
E2F7
EBF1
EBF2
EBF3
EBF4
EBI3
ECE2
ECEL1
ECEL1P2
ECRP
EDARADD
EDN3
EDNRA
EDNRB
EDNRB-AS1
EED
EEF1DP3
EFCAB5
EFCAB6
EFHD1
EFNA2
EFNA3
EFNB2
EFNB3
EFS
EGFEM1P
EGFL6
EGFLAM
EGFLAM-AS2
EGLN3
EGR2
EGR3
EGR4
EHHADH-AS1
EIF4E1B
ELFN1
ELFN1-AS1
ELMO1
ELOVL7
ELSPBP1
EMILIN2
EMILIN3
EML6
EMX1
EMX2
EMX2OS
EN2
ENDOV
ENHO
ENO4
ENPP2
ENPP5
ENPP7
ENTHD1
ENTPD1
ENTPD1-AS1
ENTPD2
EPAS1
EPB41L4A
EPB41L4A-AS1
EPB41L4A-AS2
EPC2
EPHA1
EPHA1-AS1
EPHA10
EPHA4
EPHA6
EPHA8
EPHB1
EPHB6
EPHX3
EPN3
EPOP
EPPIN
EPPIN-WFDC6
EPPK1
EPX
ERBB4
ERC2
ERCC4
ERFE
ERG
ERGIC2
ERICH1
ERICH3
ERICH5
ERICH6B
ERLIN2
ERO1B
ESM1
ESPN
ESPNP
ESR1
ESRP1
ESRRB
ESRRG
ESX1
ETV4
ETV7
EVA1A
EVI5L
EVX1
EVX1-AS
EVX2
EXOC3L2
EXOC7
EYA2
EYA4
F13A1
F2R
F5
FAAHP1
FADS6
FAM105A
FAM107A
FAM107B
FAM110C
FAM117A
FAM120B
FAM122A
FAM131B
FAM13C
FAM159B
FAM162B
FAM163A
FAM163B
FAM167A-AS1
FAM169B
FAM170A
FAM171A2
FAM174B
FAM181A-AS1
FAM181B
FAM184B
FAM189A1
FAM196A
FAM196B
FAM198A
FAM19A1
FAM19A2
FAM19A4
FAM205BP
FAM205C
FAM20A
FAM20C
FAM214A
FAM24A
FAM3B
FAM43A
FAM46C
FAM47E
FAM47E-STBD1
FAM57B
FAM69C
FAM78A
FAM83F
FAM91A1
FAR2
FAT2
FAT3
FBLN5
FBN1
FBN2
FBN3
FBP2
FBXL16
FBXL21
FBXO21
FBXO39
FBXO43
FCER2
FCRL1
FCRL2
FCRL3
FCRL4
FCRL5
FCRL6
FDXR
FENDRR
FER1L6
FER1L6-AS1
FER1L6-AS2
FERD3L
FEV
FEZ1
FEZF1
FEZF1-AS1
FEZF2
FFAR2
FFAR3
FGD5
FGF11
FGF12
FGF12-AS1
FGF12-AS3
FGF14
FGF14-AS2
FGF14-IT1
FGF18
FGF19
FGF20
FGF23
FGF3
FGF5
FGF6
FGF8
FGF9
FGFR2
FGFR3
FGFRL1
FGR
FH
FHL5
FIBCD1
FIGLA
FIGNL2
FKBP1A
FKBP1A-SDCBP2
FKTN
FLG
FLG-AS1
FLI1
FLJ16779
FLJ33534
FLJ36777
FLJ40288
FLJ41278
FLJ42102
FLRT2
FLT1
FLT3
FLT4
FMN1
FMNL3
FMOD
FN1
FNDC1
FNDC5
FNTB
FOXA2
FOXB1
FOXB2
FOXC1
FOXCUT
FOXE1
FOXE3
FOXF1
FOXF2
FOXG1
FOXG1-AS1
FOXH1
FOXI2
FOXI3
FOXJ1
FOXL2
FOXL2NB
FOXN4
FOXO6
FOXP1
FOXP2
FOXQ1
FOXS1
FRAT2
FREM2
FRMD3
FRMD4A
FRMD4B
FRMD6
FRMD6-AS2
FRMPD1
FRMPD2
FSCN2
FST
FSTL1
FSTL4
FUS
FXYD1
FXYD6
FXYD6-FXYD2
FXYD7
FYB
FYN
FZD1
FZD8
GAB2
GABARAPL2
GABBR2
GABRB1
GABRD
GABRP
GABRR3
GAD1
GADD45G
GADL1
GAL3ST4
GALNS
GALNT10
GALNT16
GALNT3
GALNT6
GALNT8
GALNT9
GALR1
GALR2
GALR3
GAP43
GAS1
GAS1RR
GAS2L2
GAS7
GATA3
GATA3-AS1
GATA4
GATA5
GATA6
GATA6-AS1
GATS
GBA3
GBX1
GBX2
GC
GCGR
GDA
GDAP1
GDAP1L1
GDF10
GDF6
GDF7
GDNF
GDNF-AS1
GFI1
GFI1B
GFRA1
GFRA2
GFY
GGTA1P
GHITM
GHR
GHRHR
GIF
GIMAP1
GIMAP1-GIMAP5
GIMAP2
GIMAP4
GIMAP5
GIMAP6
GIMAP7
GIMAP8
GJA1
GJA10
GJB2
GJB6
GJC3
GJD2
GJD4
GLB1L3
GLDN
GLI1
GLI3
GLI4
GLIS1
GLP1R
GLRA1
GLS2
GLT6D1
GLT8D2
GLYAT
GLYCAM1
GMDS
GML
GNA14
GNAL
GNAO1
GNAS
GNAS-AS1
GNG13
GNG2
GNG8
GOLGA7B
GON4L
GORAB
GOSR2
GP5
GPA33
GPATCH2L
GPC2
GPHB5
GPM6B
GPR101
GPR12
GPR137B
GPR149
GPR153
GPR158
GPR158-AS1
GPR4
GPR42
GPR6
GPR78
GPR83
GPRC6A
GPX5
GPX6
GPX7
GRAP2
GRASP
GRB10
GRB2
GREB1
GREM1
GRHL2
GRIA2
GRIA4
GRID1
GRID2
GRID2IP
GRIFIN
GRIK1
GRIK1-AS1
GRIK2
GRIK4
GRIK5
GRIN1
GRIN2B
GRIN2C
GRIN3A
GRIN3B
GRK5
GRM1
GRM3
GRM4
GRM8
GRP
GRTP1
GSC
GSC2
GSDMC
GSG1L
GSN
GSPT2
GSX1
GSX2
GTSF1
GUCY1A2
GUCY2EP
GUCY2F
GUCY2GP
GUK1
GUSBP1
GVINP1
GXYLT2
GZMA
GZMK
H19
H1FNT
H2AFY2
H2BFM
HAAO
HABP2
HAGHL
HAND1
HAND2-AS1
HAP1
HAPLN2
HAPLN4
HAR1A
HAR1B
HAS2
HAS2-AS1
HBA1
HBB
HBBP1
HBD
HBE1
HBG1
HBG2
HBM
HBQ1
HCG17
HCK
HCN2
HCN4
HCRTR2
HDAC9
HECTD2-AS1
HECW1
HECW1-IT1
HELB
HELT
HEMGN
HEPACAM2
HES2
HES3
HES5
HEY1
HEY2
HFE2
HFM1
HGF
HHLA1
HIC1
HIF3A
HILPDA
HIST3H3
HIVEP3
HLA-B
HLA-C
HLA-DMB
HLA-DOA
HLA-DPA1
HLA-DPB1
HLA-DPB2
HLA-DQA1
HLA-DQA2
HLA-DQB2
HLA-DRA
HLF
HMCN1
HMCN2
HMGB3P1
HMGN2P46
HMSD
HMX1
HMX2
HMX3
HNF1A
HNF4A
HNF4G
HOTAIR
HOTTIP
HOXA13
HOXB8
HOXC10
HOXC11
HOXC12
HOXD-AS2
HOXD10
HOXD11
HOXD12
HOXD13
HOXD8
HOXD9
HP
HPCA
HPGD
HPSE2
HR
HRASLS5
HRAT92
HRH2
HRH3
HRK
HS3ST2
HS3ST3A1
HS3ST3B1
HS3ST6
HS6ST3
HSBP1
HSD11B1
HSD11B2
HSD17B2
HSF5
HSPA12A
HSPA12B
HTR1B
HTR1E
HTR1F
HTR2A
HTR3B
HTR4
HTR5A
HTR5A-AS1
HTR6
HTR7
HTRA1
HTRA3
HTRA4
HUNK
HVCN1
HYDIN
HYMAI
ICOSLG
ID4
IDUA
IFI16
IFITM10
IFNK
IGDCC3
IGF2
IGF2-AS
IGF2BP1
IGF2BP3
IGFBP1
IGFBP2
IGFBP3
IGFBP5
IGFBP7
IGFBP7-AS1
IGFL1
IGFL2
IGFL2-AS1
IGFL3
IGFL4
IGLL5
IGLON5
IGSF11
IHH
IKZF1
IKZF3
IL16
IL17A
IL17D
IL17F
IL17REL
IL18RAP
IL1RAPL1
IL20RA
IL21R
IL2RA
IL5RA
IL7
IL7R
ILDR2
IMPA1P1
IMPACT
INA
INHBA
INHBA-AS1
INHBB
INS-IGF2
INSM1
INSM2
INSR
INSRR
IP6K3
IQCA1L
IQCJ
IQCJ-SCHIP1
IQGAP2
IQSEC2
IQSEC3
IQUB
IRF4
IRF6
IRF8
IRGM
IRX3
IRX4
IRX5
ISL1
ISL2
ISLR2
ISM1
ISM1-AS1
ISM2
ISOC1
ISOC2
ITGA1
ITGA11
ITGA7
ITGA8
ITGA9
ITGAM
ITGB8
ITIH1
ITIH2
ITIH5
ITK
ITPRIPL1
IVL
IZUMO2
JAKMIP1
JAKMIP2
JAKMIP2-AS1
JAKMIP3
JAM2
JAM3
JAML
JPH1
JPH2
JPH3
JRKL-AS1
JSRP1
KAAG1
KALRN
KANK3
KANK4
KANSL1L
KANSL2
KAZN
KCNA10
KCNA2
KCNA3
KCNA7
KCNB1
KCNB2
KCNC1
KCNC3
KCND2
KCND3
KCND3-AS1
KCND3-IT1
KCNE4
KCNG1
KCNG2
KCNH2
KCNH3
KCNH5
KCNH7
KCNIP1
KCNJ1
KCNJ10
KCNJ12
KCNJ16
KCNJ2
KCNJ2-AS1
KCNJ4
KCNJ5
KCNJ6
KCNJ9
KCNK1
KCNK10
KCNK12
KCNK13
KCNK16
KCNK17
KCNK18
KCNK2
KCNK4
KCNK4-TEX40
KCNK6
KCNK9
KCNMB4
KCNN1
KCNN3
KCNQ1
KCNQ1OT1
KCNQ2
KCNQ3
KCNS2
KCNS3
KCNT1
KCTD1
KCTD12
KCTD16
KDM4D
KEL
KERA
KIAA0040
KIAA0087
KIAA1024
KIAA1217
KIAA1324
KIAA1324L
KIAA1549L
KIAA1614
KIAA1755
KIF19
KIF1A
KIF21B
KIF26A
KIF4B
KIF5A
KIF6
KIFC2
KIR3DX1
KIRREL3
KISS1
KISS1R
KL
KLC4
KLF15
KLF7
KLHL14
KLHL20
KLHL35
KLK1
KLK10
KLK2
KLK3
KLK4
KLK9
KLKP1
KLRG2
KPRP
KREMEN1
KREMEN2
KRT1
KRT2
KRT25
KRT27
KRT28
KRT33A
KRT6A
KRT71
KRT72
KRT73
KRT73-AS1
KRT74
KRT75
KRT76
KRT77
KRT78
KRT82
KRT84
KRT8P41
KRTAP10-1
KRTAP10-3
KRTAP10-8
KRTAP12-1
KRTAP12-2
KRTAP5-10
KRTAP5-11
KRTAP5-2
KRTAP5-5
KRTAP5-AS1
KRTDAP
L1CAM
LACRT
LAD1
LAIR1
LALBA
LAMA2
LAMB1
LBH
LBX1
LBX1-AS1
LBX2
LCA10
LCE1A
LCE1B
LCE1C
LCE1D
LCE1E
LCE1F
LCE2A
LCE2B
LCE2C
LCE2D
LCE3A
LCE3B
LCE3D
LCE3E
LCE4A
LCE5A
LCE6A
LCN10
LCN6
LCN9
LCORL
LCP2
LDLRAD4
LEF1
LEF1-AS1
LELP1
LEMD1
LEUTX
LGALS13
LGALS14
LGALS16
LGALS17A
LGI2
LGI3
LGR5
LGR6
LHCGR
LHFPL3
LHFPL3-AS1
LHFPL3-AS2
LHFPL5
LHX2
LHX3
LHX4
LHX5
LHX5-AS1
LHX6
LHX8
LHX9
LILRA1
LILRA2
LILRA3
LILRA4
LILRA5
LILRB1
LILRB2
LILRB3
LILRB5
LIMS2
LIN28A
LINC-ROR
LINC00029
LINC00032
LINC00092
LINC00159
LINC00210
LINC00211
LINC00261
LINC00299
LINC00301
LINC00302
LINC00326
LINC00331
LINC00334
LINC00359
LINC00368
LINC00434
LINC00437
LINC00446
LINC00461
LINC00463
LINC00470
LINC00474
LINC00475
LINC00477
LINC00485
LINC00489
LINC00504
LINC00517
LINC00519
LINC00523
LINC00533
LINC00535
LINC00538
LINC00547
LINC00551
LINC00554
LINC00582
LINC00593
LINC00599
LINC00606
LINC00608
LINC00609
LINC00620
LINC00624
LINC00632
LINC00639
LINC00643
LINC00644
LINC00652
LINC00658
LINC00687
LINC00693
LINC00698
LINC00709
LINC00824
LINC00850
LINC00858
LINC00861
LINC00865
LINC00866
LINC00887
LINC00900
LINC00908
LINC00917
LINC00927
LINC00929
LINC00930
LINC00940
LINC00945
LINC00955
LINC00964
LINC00968
LINC00987
LINC00989
LINC01007
LINC01018
LINC01020
LINC01028
LINC01036
LINC01037
LINC01048
LINC01056
LINC01069
LINC01081
LINC01082
LINC01096
LINC01097
LINC01116
LINC01117
LINC01120
LINC01122
LINC01141
LINC01142
LINC01143
LINC01146
LINC01149
LINC01151
LINC01152
LINC01158
LINC01159
LINC01162
LINC01166
LINC01167
LINC01168
LINC01181
LINC01210
LINC01231
LINC01234
LINC01237
LINC01238
LINC01252
LINC01276
LINC01280
LINC01299
LINC01301
LINC01307
LINC01311
LINC01314
LINC01315
LINC01344
LINC01366
LINC01375
LINC01384
LINC01387
LINC01389
LINC01391
LINC01397
LINC01399
LINC01412
LINC01415
LINC01416
LINC01422
LINC01436
LINC01448
LINC01456
LINC01470
LINC01471
LINC01475
LINC01477
LINC01480
LINC01483
LINC01486
LINC01494
LINC01497
LINC01498
LINC01500
LINC01502
LINC01506
LINC01507
LINC01511
LINC01531
LINC01548
LINC01551
LINC01559
LINC01568
LINC01574
LINC01586
LINC01607
LINC01611
LINC01622
LINC01624
LINC01626
LINC01653
LINC01664
LINC01668
LINC01686
LINC01704
LINC01727
LINC01749
LINC01750
LINC01752
LINC01756
LINC01760
LINC01761
LINC01797
LINC01798
LINC01799
LINC01801
LINC01812
LINC01813
LINC01828
LINC01829
LINC01869
LINC01872
LINC01873
LINC01918
LINC01922
LINC01935
LINC01968
LINC01973
LINC01979
LINC01987
LINC02011
LINC02016
LINC02036
LINC02043
LINC02052
LINC02054
LINC02059
LINC02075
LINC02091
LINC02095
LINC02097
[truncated: 2,257 more rows]

## Sheet: H3K27me3 targets (shPHF19)
List of 5918 genes marked by H3K27me3 ChIPseq after PHF19 KD (shPHF19)
A1BG
A1CF
A2M
A2MP1
A4GALT
AADACL3
AADACL4
AAMDC
AARD
AARS2
AATK
AATK-AS1
ABAT
ABCA13
ABCA9
ABCB11
ABCB4
ABCB5
ABCC12
ABCC8
ABCC9
ABCF2
ABCG1
ABCG4
ABCG5
ABCG8
ABHD1
ABHD12B
ABHD16B
ABI3
ABLIM1
ABLIM2
ABO
ABR
ABT1
ACADL
ACAN
ACAP1
ACE
ACER1
ACHE
ACKR1
ACKR3
ACOD1
ACOT12
ACOXL
ACP7
ACPT
ACR
ACSBG2
ACSF3
ACSL6
ACSM1
ACSM4
ACSS1
ACSS3
ACTA1
ACTL9
ACTN2
ACVR1B
ACVR1C
ACVRL1
ADA
ADA2
ADAM12
ADAM21P1
ADAM23
ADAM33
ADAM8
ADAMTS1
ADAMTS10
ADAMTS12
ADAMTS13
ADAMTS14
ADAMTS16
ADAMTS17
ADAMTS19
ADAMTS19-AS1
ADAMTS2
ADAMTS3
ADAMTS6
ADAMTS7
ADAMTS8
ADAMTS9
ADAMTS9-AS2
ADAMTSL1
ADAMTSL2
ADAMTSL3
ADAP1
ADAP2
ADARB1
ADARB2
ADCY1
ADCY2
ADCY4
ADCY5
ADCY8
ADCYAP1
ADCYAP1R1
ADD3-AS1
ADGRA1
ADGRA1-AS1
ADGRA2
ADGRB1
ADGRD1
ADGRE1
ADGRE2
ADGRE3
ADGRE4P
ADGRG3
ADGRL1
ADGRL2
ADGRV1
ADM
ADO
ADRA1A
ADRA1B
ADRA1D
ADRA2A
ADRA2B
ADRA2C
AFAP1L2
AFF3
AFM
AFP
AGAP2
AGAP2-AS1
AGTR1
AGXT2
AHRR
AHSP
AICDA
AIF1L
AIFM3
AIM2
AIRE
AK5
AK7
AK8
AKAP3
AKAP6
AKT2
AKTIP
ALB
ALDH1A1
ALDH1A2
ALDH1L1
ALDH1L1-AS2
ALDH3B2
ALDOB
ALG10
ALK
ALKAL1
ALKAL2
ALKBH3
ALLC
ALMS1
ALMS1P1
ALOX12B
ALOX12P2
ALOX15
ALOX15P1
ALOX5
ALPL
ALX1
ALX3
ALX4
AMBP
AMER2
AMER3
AMH
AMMECR1
AMN
AMPD1
AMPH
AMTN
AMZ1
ANAPC2
ANGPT1
ANGPT4
ANK1
ANK3
ANKDD1A
ANKFN1
ANKH
ANKK1
ANKLE1
ANKRD18CP
ANKRD18DP
ANKRD19P
ANKRD20A19P
ANKRD24
ANKRD26P1
ANKRD27
ANKRD34B
ANKRD34C
ANKRD34C-AS1
ANKRD35
ANKRD53
ANKRD60
ANKRD62
ANKRD63
ANKRD65
ANKRD66
ANKS1B
ANKUB1
ANO1
ANO1-AS2
ANO2
ANO3
ANO4
ANO7
ANO9
ANOS1
ANP32D
ANTXRL
AOAH
AOC1
AOC2
AOC3
AP1M2
AP2B1
AP3B2
APBA1
APBB1IP
APC2
APCDD1
APCDD1L
APCDD1L-AS1
APLNR
APLP1
APOBEC3A
APOBEC3A_B
APRT
AQP5
AQP6
AQP9
ARC
ARFGEF3
ARHGAP15
ARHGAP19-SLIT1
ARHGAP20
ARHGAP4
ARHGAP40
ARHGAP44
ARHGAP6
ARHGAP9
ARHGDIG
ARHGEF1
ARHGEF4
ARHGEF40
ARHGEF6
ARHGEF7
ARHGEF7-AS1
ARHGEF7-AS2
ARID3C
ARID5A
ARID5B
ARL14EP
ARMC4P1
ARMCX2
ARNT2
ARRDC4
ARSG
ARVCF
ARX
AS3MT
ASAH2
ASB13
ASB18
ASB2
ASCL1
ASCL2
ASCL4
ASIC1
ASIC2
ASIC3
ASIC4
ASPA
ASPDH
ASPG
ASPHD1
ASPHD2
ASRGL1
ASTN1
ASTN2
ATCAY
ATF3
ATG14
ATG9B
ATL1
ATOH1
ATOH8
ATP11A
ATP12A
ATP13A4
ATP13A5
ATP1A1
ATP1A1-AS1
ATP1A3
ATP1B2
ATP2A3
ATP2B1-AS1
ATP2B2
ATP2C2
ATP4A
ATP5G2
ATP6V0A2
ATP6V1B1
ATP6V1B2
ATP6V1C2
ATP8A1
ATP8A2
ATRNL1
ATXN7L2
AUTS2
AVP
AVPR1A
AVPR1B
AXDND1
AXIN2
AZIN1-AS1
B3GALT1
B3GAT1
B3GAT2
B3GNT4
B3GNT7
B4GALNT1
B4GALNT2
B4GALNT4
B4GALT7
BAALC
BAALC-AS1
BAALC-AS2
BACE2
BACH2
BAHD1
BAIAP2L2
BAIAP3
BAMBI
BANF2
BARHL1
BARHL2
BARX1
BARX1-AS1
BARX2
BATF3
BBOX1-AS1
BCAN
BCAS1
BCL11A
BCL11B
BCL2
BCL6B
BCL9
BCYRN1
BDH1
BEAN1
BECN1
BEGAIN
BEND2
BEND4
BEND7
BEST2
BET1
BEX5
BFSP2
BGLT3
BGN
BHLHE22
BHLHE23
BHLHE41
BICC1
BICDL2
BLACAT1
BLACE
BLK
BLOC1S5-TXNDC5
BLVRB
BMI1
BMP2
BMP3
BMP4
BMP6
BMP7
BMPR1B
BMPR1B-AS1
BMS1
BMS1P21
BNC2
BOD1L2
BOLL
BORCS7-ASMT
BORCS8-MEF2B
BPGM
BPI
BPIFA1
BPIFA2
BPIFA3
BPIFA4P
BPIFB1
BPIFB2
BPIFB3
BPIFB4
BPIFB6
BPIFC
BRCAT54
BRD3
BRS3
BRSK2
BSN
BSN-AS2
BSPH1
BSPRY
BSX
BTBD11
BTBD17
BTBD3
BTNL10
BTNL2
BTNL3
BTNL8
BTNL9
BUB3
C10orf120
C10orf126
C10orf128
C10orf53
C10orf71
C10orf90
C11orf21
C11orf40
C11orf44
C11orf53
C11orf63
C11orf74
C11orf87
C11orf96
C12orf42
C12orf54
C14orf105
C14orf132
C14orf166
C14orf180
C14orf37
C14orf39
C14orf80
C15orf57
C15orf59
C16orf47
C16orf89
C16orf92
C17orf100
C17orf105
C17orf47
C17orf58
C18orf63
C19orf25
C19orf35
C19orf73
C19orf81
C1QA
C1QB
C1QC
C1QL2
C1QL3
C1QTNF1
C1QTNF1-AS1
C1QTNF12
C1QTNF2
C1QTNF4
C1QTNF5
C1QTNF7
C1QTNF8
C1R
C1RL
C1orf127
C1orf158
C1orf159
C1orf168
C1orf194
C1orf21
C1orf61
C1orf68
C1orf74
C1orf87
C20orf166-AS1
C20orf194
C20orf202
C20orf78
C20orf85
C21orf2
C21orf33
C2CD4A
C2CD4B
C2CD4C
C2CD4D
C2CD6
C2orf70
C2orf72
C2orf91
C3P1
C3orf20
C3orf22
C3orf56
C3orf70
C3orf80
C4BPA
C4orf19
C4orf22
C5orf38
C5orf49
C5orf51
C5orf52
C5orf58
C5orf64
C5orf66
C5orf66-AS1
C5orf67
C6
C7
C7orf33
C7orf57
C8A
C8orf33
C8orf37-AS1
C8orf74
C8orf89
C9
C9orf135
C9orf24
C9orf47
C9orf50
C9orf66
C9orf72
C9orf92
CA10
CA11
CA12
CA4
CA7
CA8
CABP1
CABP5
CABP7
CABS1
CACNA1A
CACNA1B
CACNA1C
CACNA1C-AS1
CACNA1C-AS4
CACNA1C-IT2
CACNA1C-IT3
CACNA1D
CACNA1E
CACNA1G
CACNA1G-AS1
CACNA1H
CACNA1I
CACNA2D1
CACNA2D2
CACNA2D3
CACNA2D4
CACNB2
CACNB3
CACNB4
CACNG2
CACNG3
CACNG4
CACNG5
CACNG7
CACNG8
CADM1
CADM3
CADM3-AS1
CADM4
CADPS
CALB1
CALB2
CALCOCO1
CALCR
CALD1
CALY
CAMK1G
CAMK2B
CAMK2N1
CAMK2N2
CAMK4
CAMKV
CAMSAP3
CAMTA1
CAND1.11
CAND2
CAPN13
CAPN14
CAPN8
CAPN9
CAPSL
CARD11
CARD6
CARMIL1
CARMIL2
CARMIL3
CARNS1
CARTPT
CASC1
CASC11
CASC15
CASC17
CASC18
CASC2
CASC21
CASC23
CASC8
CASKIN1
CASP14
CASR
CATSPERB
CATSPERG
CATSPERZ
CBFA2T3
CBX2
CBX4
CBX6
CBX7
CBX8
CCAT2
CCDC102B
CCDC105
CCDC129
CCDC136
CCDC140
CCDC149
CCDC15
CCDC151
CCDC152
CCDC158
CCDC160
CCDC168
CCDC177
CCDC178
CCDC182
CCDC183
CCDC184
CCDC185
CCDC192
CCDC26
CCDC27
CCDC3
CCDC33
CCDC38
CCDC39
CCDC40
CCDC42
CCDC60
CCDC61
CCDC63
CCDC66
CCDC78
CCDC8
CCDC85A
CCEPR
CCK
CCKAR
CCKBR
CCL15
CCL15-CCL14
CCL18
CCL23
CCL28
CCL3
CCM2L
CCNA1
CCND2
CCND2-AS1
CCND3
CCNJL
CCR2
CCR3
CCR5
CCR6
CCR7
CCT6B
CD14
CD163
CD163L1
CD177
CD1A
CD1B
CD1C
CD1D
CD1E
CD209
CD244
CD247
CD300A
CD300E
CD300LB
CD300LF
CD302
CD33
CD34
CD38
CD3D
CD3E
CD3G
CD40
CD48
CD5L
CD6
CD72
CD84
CD8A
CDC20B
CDC37
CDC42EP2
CDC42EP5
CDH1
CDH12
CDH13
CDH15
CDH17
CDH18
CDH20
CDH22
CDH23
CDH4
CDH6
CDHR1
CDHR2
CDK18
CDK4
CDK5R2
CDK6
CDKN1C
CDS1
CDX1
CDX2
CDX4
CDYL2
CEACAM18
CEACAM20
CEACAM21
CEACAM3
CEACAM4
CEACAM5
CEACAM6
CEACAM7
CEACAM8
CEBPA
CEBPA-AS1
CECR2
CECR6
CELF3
CELF4
CELF5
CELF6
CELSR1
CELSR2
CEMIP
CEND1
CEP162
CEP295
CERCAM
CERS1
CERS3
CERS3-AS1
CERS4
CES5A
CES5AP1
CFAP161
CFAP206
CFAP221
CFAP43
CFAP46
CFAP54
CFAP58
CFAP58-AS1
CFAP61
CFAP65
CFAP69
CFAP70
CFAP73
CFAP74
CFAP77
CFAP99
CFI
CFTR
CGA
CGNL1
CH25H
CHAT
CHCHD7
CHD5
CHGA
CHGB
CHIA
CHIAP2
CHIT1
CHL1
CHL1-AS2
CHMP2B
CHMP6
CHN2
CHODL
CHODL-AS1
CHP2
CHPF
CHPF2
CHRD
CHRDL2
CHRM1
CHRM4
CHRNA2
CHRNA3
CHRNA4
CHRNA7
CHRNB2
CHRNB4
CHRND
CHRNE
CHRNG
CHST1
CHST13
CHST2
CHST4
CHST8
CHST9
CHSY1
CHSY3
CHTF18
CHURC1-FNTB
CIB4
CIITA
CILP2
CISH
CISTR
CITED1
CLC
CLCA1
CLCN1
CLDN10
CLDN10-AS1
CLDN12
CLDN14
CLDN5
CLDN7
CLEC11A
CLEC12A
CLEC17A
CLEC2L
CLEC3B
CLEC4D
CLEC4E
CLEC4F
CLEC4G
CLEC4GP1
CLEC4M
CLEC6A
CLIC5
CLIC6
CLMP
CLPSL1
CLPSL2
CLRN1
CLRN2
CLSTN2
CLUL1
CLVS1
CLVS2
CLYBL
CMA1
CMAHP
CMKLR1
CMPK2
CMTM5
CMTR2
CMYA5
CNBD2
CNDP1
CNFN
CNGA3
CNGB3
CNIH2
CNIH3
CNKSR2
CNMD
CNNM1
CNPY1
CNR1
CNRIP1
CNTD2
CNTFR
CNTFR-AS1
CNTN2
CNTN5
CNTNAP2
COG2
COL11A2
COL14A1
COL15A1
COL19A1
COL1A1
COL20A1
COL23A1
COL24A1
COL25A1
COL26A1
COL27A1
COL2A1
COL4A1
COL4A2
COL4A3
COL4A4
COL4A6
COL5A3
COL6A1
COL6A3
COL6A4P2
COL6A5
COL6A6
COL8A1
COL8A2
COL9A1
COL9A2
COL9A3
COLCA1
COLCA2
COLEC10
COLEC12
COLGALT2
COLQ
COMMD3-BMI1
COMMD5
COMP
COPZ2
CORIN
CORO2B
CORO6
COX6B2
COX6C
COX7A2
CPA6
CPAMD8
CPEB1
CPEB1-AS1
CPEB3
CPED1
CPLX1
CPLX2
CPLX4
CPNE4
CPNE5
CPNE9
CPS1
CPVL
CPXM2
CPZ
CR1
CR1L
CR2
CRABP1
CRABP2
CRAT40
CRB1
CRB2
CRBN
CRCT1
CREB3L1
CREB3L3
CREB5
CREG2
CRH
CRHBP
CRHR1
CRHR2
CRIP1
CRIP2
CRLF1
CRMP1
CRNDE
CRNN
CRTAC1
CRTAM
CRY2
CRYBA2
CRYBB2
CRYBG3
CRYL1
CRYM
CSF1R
CSF2RB
CSMD2
CSN3
CSNK1A1L
CSPG5
CSRP2
CST13P
CST7
CST9
CSTF2T
CTCFL
CTD-2194D22.4
CTD-2270F17.1
CTD-2297D10.2
CTNNA2
CTNNA3
CTNNBL1
CTNND2
CTRB1
CTTNBP2
CTXN2
CUX2
CWF19L2
CWH43
CX3CR1
CXCL14
CXCL16
CXCR1
CXCR4
CXXC4
CXXC4-AS1
CXXC5
CYB5R2
CYB5R4
CYC1
CYFIP2
CYP11A1
CYP11B1
CYP11B2
CYP17A1
CYP19A1
CYP24A1
CYP26A1
CYP26B1
CYP26C1
CYP27B1
CYP2A13
CYP2B6
CYP2B7P
CYP2C18
CYP2C8
CYP2C9
CYP2E1
CYP2F1
CYP3A4
CYP3A43
CYP3A7
CYP3A7-CYP3A51P
CYP46A1
CYP4B1
CYP4F2
CYP4F22
CYP4F24P
CYP4F8
CYP4X1
CYS1
CYSLTR2
CYYR1
CYYR1-AS1
DAAM1
DAAM2
DAB1
DAB2
DAB2IP
DACH1
DACT1
DACT3
DACT3-AS1
DAO
DAPK1
DBH
DBH-AS1
DBNL
DBP
DBX1
DBX2
DCAF5
DCAF8
DCD
DCDC1
DCDC2
DCDC2C
DCDC5
DCHS1
DCHS2
DCLK1
DCLK3
DCN
DCTN2
DDAH1
DDC
DDN
DDX25
DEF6
DEFA10P
DEFA11P
DEFA5
DEFA8P
DEFB112
DEFB116
DEFB118
DEFB119
DEFB121
DEFB122
DEFB125
DEFB126
DEFB127
DEFB128
DEFB129
DENND2A
DENND2D
DEUP1
DGCR10
DGCR14
DGCR5
DGCR9
DGKG
DGKI
DGKK
DGKZ
DHH
DHRS2
DHRS7B
DHRS9
DIGIT
DIO2
DIO3
DIP2C
DIRAS1
DIRAS2
DIRAS3
DIRC3
DISC1
DISP3
DKFZP434H168
DKFZP434K028
DKFZp686K1684
DKFZp779M0652
DKK2
DKK3
DLEC1
DLG2
DLG3
DLG5
DLG5-AS1
DLGAP1
DLGAP1-AS3
DLGAP1-AS4
DLGAP2
DLGAP3
DLGAP4
DLGAP4-AS1
DLK1
DLK2
DLL1
DLL3
DLL4
DLX1
DLX3
DLX4
DLX5
DLX6
DLX6-AS1
DMBT1
DMBT1P1
DMGDH
DMRT2
DMRT3
DMRTA1
DMRTA2
DMRTC2
DMTN
DNAAF1
DNAH10
DNAH11
DNAH14
DNAH3
DNAH6
DNAH7
DNAH8
DNAH9
DNAI1
DNAI2
DNAJB5-AS1
DNAJB8
DNAJB8-AS1
DNAJC19
DNAJC22
DNAJC24
DNASE1L2
DNER
DNM3
DNMT3L
DNTT
DOC2A
DOC2B
DOCK1
DOCK2
DOCK3
DOCK8
DOK6
DOK7
DPEP1
DPF1
DPF3
DPH1
DPP4
DPY19L2P4
DPYD
DPYSL4
DPYSL5
DQX1
DRAXIN
DRD1
DRD2
DRD3
DRGX
DRICH1
DSCAML1
DSCR4
DSCR8
DSP
DSPP
DTHD1
DTNA
DTX1
DTX4
DUOX1
DUOX2
DUOXA1
DUOXA2
DUSP15
DUSP2
DUSP26
DUSP27
DUSP3
DUSP4
DUSP8
DUSP9
DYDC1
DYDC2
DYNC1I1
DYNC2LI1
DYRK4
DYSF
DZIP1
EBF1
EBF2
EBF3
EBF4
EBI3
ECE2
ECEL1
ECEL1P2
ECRP
EDAR
EDARADD
EDDM3B
EDEM3
EDN3
EDNRA
EDNRB
EDNRB-AS1
EED
EEF1DP3
EFCAB12
EFCAB5
EFCAB6
EFCAB6-AS1
EFCC1
EFHD1
EFNA2
EFNA3
EFNB1
EFNB2
EFNB3
EFS
EGFEM1P
EGFL6
EGFL7
EGFLAM
EGFLAM-AS2
EGFLAM-AS4
EGLN3
EGR2
EGR3
EGR4
EHHADH-AS1
EIF3H
EIF4E1B
EIF4E3
EIF5A2
ELAVL3
ELFN1
ELFN1-AS1
ELMO1
ELN
ELOVL3
ELOVL7
ELSPBP1
EMILIN2
EMILIN3
EML1
EML6
EMX1
EMX2
EMX2OS
EN1
EN2
ENDOV
ENG
ENHO
ENO4
ENPP2
ENPP5
ENPP7
ENTHD1
ENTPD1
ENTPD1-AS1
ENTPD2
ENTPD3
ENTPD8
EOMES
EPAS1
EPB41L1
EPB41L4A
EPB41L4A-AS1
EPB41L4A-AS2
EPC2
EPCAM
EPDR1
EPHA1
EPHA1-AS1
EPHA10
EPHA4
EPHA6
EPHA8
EPHB1
EPHB3
EPHB6
EPHX3
EPN3
EPO
EPOP
EPPIN
EPPIN-WFDC6
EPPK1
EPSTI1
EPX
EPYC
EQTN
ERBB4
ERC2
ERCC6
ERFE
ERG
ERGIC2
ERICH1
ERICH3
ERICH3-AS1
ERICH5
ERICH6B
ERO1B
ESAM
ESM1
ESPN
ESPNL
ESPNP
ESR1
ESR2
ESRP1
ESRRB
ESRRG
ESX1
ESYT3
ETNPPL
ETS1
ETV1
ETV4
ETV7
EVA1A
EVI5L
EVX1
EVX1-AS
EVX2
EXD3
EXOC3L1
EXOC3L2
EXOC3L4
EXOC6
EXOC7
EYA1
EYA2
EYA4
F13A1
F2R
F5
FAAHP1
FABP1
FABP7
FADS6
FAM104B
FAM105A
FAM107A
FAM107B
FAM110C
FAM110D
FAM117A
FAM120B
FAM122A
FAM129A
FAM129C
FAM131B
FAM13C
FAM149A
FAM159A
FAM159B
FAM162B
FAM163A
FAM163B
FAM167A-AS1
FAM169B
FAM170A
FAM171A2
FAM172A
FAM174B
FAM180A
FAM181A
FAM181A-AS1
FAM181B
FAM184B
FAM189A1
FAM189A2
FAM196A
FAM196B
FAM198A
FAM19A1
FAM19A2
FAM19A4
FAM205BP
FAM205C
FAM20A
FAM20C
FAM212A
FAM212B
FAM212B-AS1
FAM213B
FAM24A
FAM3B
FAM3D
FAM3D-AS1
FAM43A
FAM43B
FAM46C
FAM47E
FAM47E-STBD1
FAM57B
FAM69C
FAM71B
FAM78A
FAM78B
FAM83B
FAM83F
FAM86EP
FAM91A1
FAM98B
FAR2
FASTKD2
FAT2
FAT3
FBLIM1
FBLL1
FBLN1
FBLN2
FBLN5
FBN1
FBN2
FBN3
FBP1
FBP2
FBRSL1
FBXL15
FBXL16
FBXL21
FBXO15
FBXO21
FBXO32
FBXO39
FBXO43
FBXW8
FCER2
FCHO1
FCRL1
FCRL2
FCRL3
FCRL4
FCRL5
FCRL6
FDXR
FENDRR
FER1L6
FER1L6-AS1
FER1L6-AS2
FERD3L
FEV
FEZ1
FEZF1
FEZF1-AS1
FEZF2
FFAR2
FFAR3
FFAR4
FGD3
FGD5
FGF11
FGF12
FGF12-AS1
FGF12-AS3
FGF14
FGF14-AS1
FGF14-AS2
FGF14-IT1
FGF17
FGF18
FGF19
FGF20
FGF22
FGF23
FGF3
FGF4
FGF5
FGF6
FGF8
FGF9
FGFR2
FGFR3
FGFRL1
FGR
FH
FHL5
FIBCD1
FICD
FIGLA
FIGNL1
FIGNL2
FKBP1A
FKBP1A-SDCBP2
FKTN
FLG-AS1
FLG2
FLI1
FLJ12825
FLJ16779
FLJ30679
FLJ33534
FLJ36777
FLJ40288
FLJ41278
FLJ42102
FLRT2
FLT1
FLT3
FLT4
FLYWCH1
FMN1
FMN2
FMNL3
FMO1
FMO3
FMOD
FN1
FNDC1
FNDC10
FNDC4
FNDC5
FNDC8
FNTB
FOXA2
FOXA3
FOXB1
FOXB2
FOXC1
FOXC2
FOXC2-AS1
FOXCUT
FOXD1
FOXE1
FOXE3
FOXF1
FOXF2
FOXG1
FOXG1-AS1
FOXH1
FOXI2
FOXI3
FOXJ1
FOXL2
FOXL2NB
FOXN4
FOXO1
FOXO6
FOXP1
FOXP2
FOXQ1
FOXS1
FPGT-TNNI3K
FPR2
FRA10AC1
FRAT1
FRAT2
FREM2
FREM3
FRMD1
FRMD3
FRMD4A
FRMD4B
FRMPD1
FRMPD2
FRRS1L
FSCN2
FSCN3
FSD2
FST
FSTL1
FSTL3
FSTL4
FUS
FUT2
FUT9
FXYD1
FXYD3
FXYD6
FXYD6-FXYD2
FXYD7
FYB
FYN
FZD1
FZD3
FZD7
FZD8
GAB2
GAB4
GABARAPL2
GABBR2
GABRB1
GABRD
GABRP
GABRQ
GABRR3
GAD1
GAD2
GADD45G
GADL1
GAL3ST2
GAL3ST4
GALNS
GALNT10
GALNT12
GALNT14
GALNT16
GALNT3
GALNT6
GALNT8
GALNT9
GALR1
GALR2
GALR3
GAMT
GAP43
GAPDHS
GAPT
GAREM2
GAS1
GAS1RR
GAS2L2
GAS7
GATA3
GATA3-AS1
GATA4
GATA5
GATA6
GATA6-AS1
GATM
GATS
GBA3
GBX1
GBX2
GC
GCGR
GCKR
GDA
GDAP1
GDAP1L1
GDF1
GDF10
GDF2
GDF6
GDF7
GDNF
GDNF-AS1
GDPD5
GFER
GFI1
GFI1B
GFPT2
GFRA1
GFRA2
GFRA3
GFY
GGTA1P
GHET1
GHITM
GHR
GHRHR
GHSR
GIF
GIMAP1
GIMAP1-GIMAP5
GIMAP2
GIMAP4
GIMAP5
GIMAP6
GIMAP7
GIMAP8
GINS2
GINS3
GIPC3
GJA1
GJA10
GJA3
GJA5
GJB2
GJB6
GJC3
GJD2
GJD4
GK2
GLB1L3
GLDN
GLI1
GLI3
GLI4
GLIPR2
GLIS1
GLP1R
GLRA1
GLRA2
GLS2
GLT6D1
GLT8D2
GLYAT
GLYATL2
GLYCAM1
GMDS
GML
GMPR
GNA14
GNAL
GNAO1
GNAS
GNAS-AS1
GNAT1
GNAZ
GNG12-AS1
GNG13
GNG2
GNG7
GNG8
GOLGA6L2
GOLGA7B
GOLGB1
GON4L
GORAB
GOSR2
GP1BB
GP5
GPA33
GPATCH2L
GPC2
GPC5
GPHB5
GPM6B
GPR101
GPR12
GPR137B
GPR142
GPR149
GPR150
GPR153
GPR158
GPR158-AS1
GPR161
GPR162
GPR26
GPR27
GPR37
GPR4
GPR42
GPR50
GPR50-AS1
GPR6
GPR61
GPR62
GPR65
GPR78
GPR83
GPRC5B
GPRC6A
GPRIN1
GPX5
GPX6
GPX7
GRAMD2
GRAP2
GRASP
GRB10
GREB1
GREM1
GRHL2
GRIA2
GRIA4
GRID1
GRID2
GRID2IP
GRIFIN
GRIK1
GRIK1-AS1
GRIK2
GRIK3
GRIK4
GRIK5
GRIN1
GRIN2B
GRIN2C
GRIN2D
GRIN3A
GRIN3B
GRK5
GRM1
GRM2
GRM3
GRM4
GRM5
GRM5-AS1
GRM8
GRP
GRTP1
GS1-24F4.2
GSC
GSC2
GSDMA
GSDMC
GSG1L
GSN
GSPT2
GSTP1
GSX1
GSX2
GTSF1
GUCY1A2
GUCY1A3
GUCY2EP
GUCY2F
GUCY2GP
GUF1
GUK1
GVINP1
GXYLT2
GZMA
GZMK
GZMM
H19
H1FNT
H2AFY2
H2BFM
H2BFWT
HAAO
HABP2
HAGHL
HAGLR
HAND1
HAND2-AS1
HAP1
HAPLN1
HAPLN2
HAPLN3
HAPLN4
HAR1A
HAR1B
HAS2
HAS2-AS1
HAUS7
HBA1
HBA2
HBB
HBBP1
HBD
HBE1
HBG1
HBG2
HBM
HBQ1
HBZ
HCG17
HCG24
HCK
HCN2
HCN4
HCRTR1
HCRTR2
HDAC5
HDAC9
HDHD5
HECTD2-AS1
HECW1
HECW1-IT1
HECW2
HELT
HEMGN
HEPACAM2
HEPHL1
HERC3
HES2
HES3
HES5
HEXA
HEXA-AS1
HEY1
HEY2
HFE2
HFM1
HGF
HHATL
HHIPL1
HHLA1
HIC1
HIF3A
HIGD2B
HIKESHI
HIST1H2AA
HIST1H3I
HIST1H4L
HIST3H3
HIVEP3
HLA-B
HLA-C
HLA-DMB
HLA-DOA
HLA-DPA1
HLA-DPB1
HLA-DPB2
HLA-DQA1
HLA-DQA2
HLA-DQB1-AS1
HLA-DQB2
HLA-DRA
HLA-F-AS1
HLA-L
HLF
HMCN1
HMCN2
HMGB3P1
HMGCS2
HMGN2P46
HMGN5
HMSD
HMX1
HMX2
HMX3
HNF1A
HNF4A
HNF4G
HOTAIR
HOTTIP
HOXA11
HOXA11-AS
HOXA13
HOXB8
HOXB9
HOXC10
HOXC11
HOXC12
HOXC4
HOXC8
HOXD-AS2
HOXD1
HOXD10
HOXD11
HOXD12
HOXD13
HOXD3
HOXD8
HOXD9
HP
HPCA
HPCAL4
HPGD
HPN
[truncated: 3,919 more rows]

## Sheet: EZH2 targets (shCTR)
List of 561 genes marked by EZH2 ChIPseq in control conditions (shCTR)
ABO
ABR
ACHE
ACOXL
ADAMTS12
ADAMTS8
ADGRA1
ADGRA1-AS1
ADGRV1
AGAP2
AKAP6
ALK
ALKAL1
ALKAL2
ALOX5
ALX4
AMH
AMN
ANK3
ANKRD19P
ANO1
ANO1-AS2
ANO2
APC2
APCDD1
ARHGEF7
ARHGEF7-AS2
ARID3C
ARX
ATF3
ATL1
ATP6V0A2
ATP6V1C2
BARHL1
BARX1
BARX1-AS1
BCL11A
BCL11B
BEGAIN
BHLHE41
BICDL2
BLACAT1
BMP4
BMP6
BMP7
BMPR1B
BMPR1B-AS1
BNC2
BSX
C11orf96
C15orf59
C20orf166-AS1
C2CD4A
C2CD4C
C3orf70
CABP1
CABP7
CACNA1G
CACNA1G-AS1
CACNA2D1
CACNA2D3
CACNG4
CADM3
CAMK2B
CAMK2N2
CASC15
CASC23
CBFA2T3
CBX4
CBX8
CCDC85A
CCND2
CCND2-AS1
CDH22
CDH23
CDK5R2
CDK6
CDX2
CEACAM21
CECR2
CHD5
CHRD
CHRNA3
CHST8
CIITA
CITED1
CLIC5
CNPY1
CNR1
CNTD2
CNTFR
COL15A1
COL2A1
COL4A1
COL4A2
COL8A1
COL9A3
COLEC12
COMP
CPZ
CRABP1
CRHR1
CRLF1
CRNDE
CRTAC1
CRYBA2
CUX2
CXCL14
CXXC5
CYP24A1
CYP26B1
DACT1
DBX1
DGKI
DHH
DIGIT
DKFZP434H168
DLGAP4
DLL1
DLX1
DLX3
DNAH10
DNAJC22
DNER
DOC2B
DPF3
DPYSL5
DRAXIN
DRGX
DSP
DUSP15
DUSP4
EBF1
EBF2
ECE2
EFNA3
EGR3
EGR4
EMILIN2
EMX1
EMX2
EMX2OS
EN2
EPHA8
ESR1
ESRP1
ESRRB
EYA4
FAM120B
FAM131B
FAM189A1
FAM20A
FBN3
FBXL16
FDXR
FENDRR
FEV
FEZF2
FGF3
FGF8
FGF9
FGFR3
FLRT2
FLT3
FLT4
FNDC1
FOXA2
FOXB1
FOXB2
FOXC1
FOXCUT
FOXF1
FOXF2
FOXG1-AS1
FOXI3
FOXL2
FOXL2NB
FOXN4
FOXP2
FOXQ1
FRMD4B
FSCN2
FST
FSTL4
GABBR2
GALR2
GATA3
GATA3-AS1
GATA4
GATA5
GBX1
GCGR
GDF7
GDNF
GDNF-AS1
GFI1
GFRA2
GGTA1P
GJB6
GLI3
GNA14
GNAO1
GRHL2
GRID1
GRIK5
GRIN1
GRIN2C
GRM4
GSC
HAND1
HAR1A
HAR1B
HCN4
HECW1
HES3
HEY1
HEY2
HIC1
HMCN1
HOXD13
HPSE2
HRAT92
HRH3
HRK
HS3ST6
HS6ST3
HTRA3
ICOSLG
IDUA
IGDCC3
IGF1R
IGF2
IGF2-AS
IGF2BP1
IGF2BP3
IGFBP3
IHH
IKZF3
IL20RA
ILDR2
INHBB
INS-IGF2
INSM1
INSM2
IQSEC2
IRAIN
IRF8
IRX3
IRX5
ISLR2
ISM1
ITGB8
JAM2
JPH3
JSRP1
KANK3
KANK4
KCNJ4
KCNK12
KCNK13
KCNN1
KCNQ2
KCNQ3
KCTD1
KCTD16
KIF1A
KIF26A
KLHL35
KLK10
LAD1
LBH
LBX1
LBX1-AS1
LDLRAD4
LEF1
LEF1-AS1
LGR5
LHX2
LHX3
LHX4
LHX5
LHX5-AS1
LHX6
LINC00092
LINC01082
LINC01210
LINC01276
LINC01314
LINC01391
LINC01607
LINC01798
LINC02202
LINC02210-CRHR1
LINGO1
LINGO3
LMO1
LMX1B
LOC100128770
LOC100129434
LOC100129697
LOC100287944
LOC100288748
LOC100505588
LOC100996724
LOC101927248
LOC101927497
LOC101927811
LOC101928370
LOC101929122
LOC101929748
LOC102723313
LOC283731
LOC283856
LOC389332
LOC400706
LOC440461
LOC646548
LOR
LPL
LRP2
LRP4
LRRC26
LRRC4B
LTK
LYPD1
MACROD1
MAD2L2
MAEL
MAFA
MAL2
MAN1A1
MAP6
MAP7
MAPK4
MDGA2
MECOM
MEIS3
MIR1-1
MIR1-1HG
MIR1234
MIR124-3
MIR129-2
MIR203A
MIR203B
MIR3131
MIR3621
MIR3663HG
MIR4321
MIR4526
MIR4634
MIR4734
MIR548G
MIR6720
MIR9-3HG
MKX
MKX-AS1
MLLT6
MMP25
MNX1
MSX1
MYO10
MYO5B
MYOCD
NAT16
NBPF20
NBPF25P
NBPF9
NELL2
NEUROD2
NEUROG1
NEUROG2
NEUROG3
NFATC2
NGFR
NIM1K
NKAIN1
NKX1-2
NKX2-1
NKX2-1-AS1
NKX2-2
NKX2-3
NLGN1
NOL4
NOTO
NOTUM
NPAS3
NPNT
NPTX1
NR3C2
NRN1
NSG1
NTNG2
OLIG1
OLIG3
ONECUT2
ONECUT3
OPRD1
OSBPL1A
OSTM1-AS1
OVOL1
OVOL1-AS1
OVOL2
PAPPA
PAX2
PAX5
PAX6
PAX7
PBX1
PCBP3
PCDH1
PCSK9
PDE4D
PDE4DIP
PDGFA
PELI2
PGBD5
PGR
PGR-AS1
PHACTR1
PHF21B
PIP5K1B
PKNOX2
PKNOX2-AS1
PLXNA4
PLXNC1
PP7080
PPARGC1A
PPP2R2C
PRDM12
PRDM13
PRDM6
PRKG1
PROK2
PRR35
PSD2
PTENP1
PTENP1-AS
PTPRN2
PTPRU
PTPRZ1
PVALB
RAI2
RALGAPA1
RARB
RASGRP2
RFLNA
RFX4
RFX6
RHBDL3
RIPK4
RNF39
RORA
RORA-AS1
RSPO1
RSPO3
RTN1
RTN4RL1
RTN4RL2
RUNX1T1
S1PR1
SAMD11
SATB1
SCARF2
SCGB3A1
SCRT1
SDK2
SEMA5B
SFTA3
SHC3
SHE
SHH
SHISA8
SIDT1
SKOR1
SLC15A1
SLC1A2
SLC1A3
SLC25A48
SLC26A4
SLC26A4-AS1
SLC30A2
SLC30A3
SLC35D3
SLC40A1
SLC6A4
SLC7A10
SLC7A2
SLC8A3
SLC9A3
SLC9A3-AS1
SLFN11
SNCAIP
SNORA89
SNORA99
SOX18
SOX2
SOX2-OT
SOX21
SOX21-AS1
SOX5
SOX7
SP8
SPRR2C
SRD5A2
SRGAP2-AS1
SRP68
SSTR2
ST14
STUM
STXBP5L
SV2C
SVEP1
SYK
SYT2
SYT6
TBX1
TC2N
TCHH
TDRD10
TENM2
THBS4
THPO
TINCR
TJP1
TLX2
TMEM151B
TMEM178A
TMEM178B
TMEM181
TMEM59L
TMOD1
TMPRSS2
TNFAIP8L3
TP73
TRH
TRIM36
TSPEAR
TTC9B
TTLL9
TUBB2B
UNC5B
UNCX
VENTX
VGLL2
VSNL1
VWA5B2
WDR86
WDR86-AS1
WNT1
WNT3A
WNT6
WNT7A
WRAP73
WTIP
ZACN
ZBTB16
ZBTB7C
ZDHHC22
ZFHX4
ZFHX4-AS1
ZNF423

## Sheet: EZH2 targets (shPHF19)
List of 2084 genes marked by EZH2 ChIPseq after PHF19 KD (shPHF19)
A4GALT
AAMDC
AARS2
AATK
AATK-AS1
ABCG1
ABHD12B
ABHD16B
ABLIM1
ABLIM2
ABO
ABR
ACADL
ACAN
ACE
ACHE
ACKR1
ACKR3
ACOXL
ACSL6
ACSS1
ACVR1C
ADAM23
ADAM33
ADAMTS10
ADAMTS12
ADAMTS14
ADAMTS16
ADAMTS19
ADAMTS19-AS1
ADAMTS7
ADAMTS8
ADAMTS9
ADAMTS9-AS2
ADAP1
ADAP2
ADARB2
ADCY5
ADCY8
ADCYAP1
ADCYAP1R1
ADGRA1
ADGRA1-AS1
ADGRA2
ADGRB1
ADGRL1
ADGRV1
ADM
ADRA1A
ADRA1D
ADRA2A
ADRA2C
AFF3
AGAP2
AGXT2
AHRR
AHSP
AIF1L
AK5
AKAP6
ALK
ALKAL1
ALKAL2
ALOX12B
ALOX15
ALOX5
ALX3
ALX4
AMER2
AMER3
AMH
AMN
AMPH
AMZ1
ANK1
ANK3
ANKRD18DP
ANKRD19P
ANKRD24
ANKRD27
ANKRD34B
ANKRD34C
ANKRD34C-AS1
ANKRD63
ANKRD65
ANKS1B
ANO1
ANO1-AS2
ANO2
ANO9
AP1M2
APBB1IP
APC2
APCDD1
AQP5
ARC
ARHGAP19-SLIT1
ARHGAP20
ARHGAP9
ARHGDIG
ARHGEF1
ARHGEF4
ARHGEF40
ARHGEF6
ARHGEF7
ARHGEF7-AS2
ARID3C
ARMC4P1
ARNT2
ARX
ASCL2
ASCL4
ASIC3
ASIC4
ATCAY
ATF3
ATG9B
ATL1
ATOH8
ATP12A
ATP1A3
ATP2A3
ATP2B2
ATP2C2
ATP6V0A2
ATP6V1C2
ATP8A1
ATP8A2
ATRNL1
AVPR1A
AVPR1B
AXIN2
B3GAT1
B3GAT2
B3GNT4
B3GNT7
B4GALNT2
B4GALNT4
BAALC
BAALC-AS2
BACH2
BAHD1
BAIAP3
BAMBI
BARHL1
BARX1
BARX1-AS1
BARX2
BCAT1
BCL11A
BCL11B
BCL2
BEAN1
BEGAIN
BEND4
BHLHE23
BHLHE41
BICDL2
BLACAT1
BLVRB
BMI1
BMP2
BMP3
BMP4
BMP6
BMP7
BMPR1B
BMPR1B-AS1
BNC1
BNC2
BOC
BRSK2
BSN
BSN-AS2
BSPRY
BSX
BTNL9
BUB3
C11orf63
C11orf96
C14orf37
C14orf80
C15orf59
C17orf58
C19orf25
C19orf73
C1QL3
C1QTNF1
C1QTNF1-AS1
C1QTNF12
C1QTNF2
C1QTNF4
C1QTNF5
C1QTNF8
C1orf194
C1orf61
C1orf87
C20orf166-AS1
C21orf33
C2CD4A
C2CD4B
C2CD4C
C2CD4D
C2orf70
C2orf72
C3orf70
C3orf80
C4orf19
C5orf49
C5orf66
C5orf66-AS1
C6
C8orf37-AS1
C9orf66
CA4
CA7
CABP1
CABP7
CACNA1A
CACNA1B
CACNA1C
CACNA1C-AS1
CACNA1D
CACNA1E
CACNA1G
CACNA1G-AS1
CACNA1H
CACNA2D1
CACNA2D2
CACNA2D3
CACNA2D4
CACNB2
CACNB4
CACNG2
CACNG4
CACNG7
CADM3
CADM4
CADPS
CALCR
CALY
CAMK2B
CAMK2N2
CAMK4
CAMKV
CAMTA1
CAND1.11
CAPSL
CARMIL2
CARNS1
CASC15
CASC23
CASKIN1
CATSPERG
CATSPERZ
CBFA2T3
CBX2
CBX4
CBX8
CCDC140
CCDC177
CCDC183
CCDC185
CCDC3
CCDC39
CCDC40
CCDC61
CCDC78
CCDC85A
CCEPR
CCK
CCKBR
CCM2L
CCNA1
CCND2
CCND2-AS1
CD1D
CD38
CD40
CD8A
CDC37
CDC42EP5
CDH1
CDH22
CDH23
CDHR1
CDK4
CDK5R2
CDK6
CDKN1C
CDX2
CDYL2
CEACAM21
CEBPA
CEBPA-AS1
CECR2
CECR6
CELF4
CELF5
CELSR1
CEMIP
CFAP46
CFAP65
CFAP73
CFAP74
CFAP77
CGNL1
CHAT
CHCHD7
CHD5
CHGB
CHL1
CHL1-AS2
CHMP6
CHN2
CHRD
CHRDL2
CHRM1
CHRM4
CHRNA3
CHRNA4
CHRNA7
CHRNB2
CHRND
CHST1
CHST8
CHSY3
CIITA
CILP2
CISTR
CITED1
CLDN10
CLDN5
CLDN7
CLEC2L
CLIC5
CLIC6
CLMP
CLSTN2
CLVS1
CMPK2
CNIH3
CNNM1
CNPY1
CNR1
CNTD2
CNTFR
CNTN2
COL11A2
COL14A1
COL15A1
COL19A1
COL25A1
COL26A1
COL27A1
COL2A1
COL4A1
COL4A2
COL5A3
COL8A1
COL8A2
COL9A2
COL9A3
COLEC12
COMMD3-BMI1
COMP
CPAMD8
CPEB3
CPLX1
CPLX2
CPNE9
CPVL
CPZ
CR2
CRABP1
CRB2
CREB5
CREG2
CRHBP
CRHR1
CRHR2
CRIP1
CRIP2
CRLF1
CRMP1
CRNDE
CRTAC1
CRYBA2
CTD-2194D22.4
CTD-2297D10.2
CTNND2
CTTNBP2
CUX2
CXCL14
CXCL16
CXCR4
CXXC4
CXXC4-AS1
CXXC5
CYB5R2
CYP19A1
CYP24A1
CYP26A1
CYP26B1
CYP26C1
CYP27B1
CYP2E1
CYP4F22
CYP4X1
CYS1
DAB2
DAB2IP
DACT1
DACT3
DACT3-AS1
DAPK1
DBX1
DBX2
DCDC2
DCLK1
DEGS2
DENND2A
DEUP1
DGKG
DGKI
DGKK
DGKZ
DHH
DIGIT
DIRAS1
DISP3
DKFZP434H168
DKFZp686K1684
DLG3
DLGAP3
DLGAP4
DLK2
DLL1
DLL4
DLX1
DLX3
DLX5
DLX6-AS1
DMRT3
DMRTA2
DNAH10
DNAJC22
DNASE1L2
DNER
DOC2B
DOCK1
DOCK8
DOK7
DPF1
DPF3
DPY19L2P4
DPYSL4
DPYSL5
DRAXIN
DRD2
DRGX
DSCAML1
DSP
DTNA
DTX1
DTX4
DUOX2
DUOXA2
DUSP15
DUSP26
DUSP4
DUSP8
DUSP9
DYSF
EBF1
EBF2
EBF3
EBF4
ECE2
ECEL1
ECEL1P2
EDARADD
EFCC1
EFHD1
EFNA2
EFNA3
EFNB2
EFNB3
EFS
EGFEM1P
EGFL6
EGFLAM
EGLN3
EGR2
EGR3
EGR4
EIF4E1B
EIF4E3
ELOVL7
EMILIN2
EMILIN3
EML6
EMX1
EMX2
EMX2OS
EN2
ENDOV
ENG
ENTPD2
EPAS1
EPB41L1
EPB41L4A
EPB41L4A-AS2
EPHA8
EPHB1
EPHB3
EPHB6
EPHX3
EPN3
EPO
EPOP
EPPK1
ERBB4
ERC2
ERFE
ERG
ERICH5
ESPN
ESPNP
ESR1
ESR2
ESRP1
ESRRB
ESRRG
ESX1
ETV7
EVX1
EVX1-AS
EVX2
EXOC3L2
EXOC7
EYA4
FADS6
FAM107B
FAM110C
FAM120B
FAM131B
FAM13C
FAM155B
FAM159A
FAM159B
FAM162B
FAM163A
FAM174B
FAM181B
FAM184B
FAM189A1
FAM196A
FAM198A
FAM19A4
FAM205C
FAM20A
FAM20C
FAM3B
FAM43A
FAM57B
FAM78A
FAM83B
FAM83F
FBLN5
FBN1
FBN3
FBRSL1
FBXL16
FCRL3
FDXR
FENDRR
FEV
FEZ1
FEZF1
FEZF1-AS1
FEZF2
FGF11
FGF12
FGF12-AS3
FGF14
FGF18
FGF19
FGF20
FGF3
FGF8
FGF9
FGFR2
FGFR3
FGR
FIBCD1
FIGLA
FLI1
FLJ16779
FLRT2
FLT1
FLT3
FLT4
FMN2
FMOD
FNDC1
FNDC10
FNDC4
FNDC5
FOXA2
FOXA3
FOXB1
FOXB2
FOXC1
FOXCUT
FOXE3
FOXF1
FOXF2
FOXG1-AS1
FOXH1
FOXI2
FOXI3
FOXJ1
FOXL2
FOXL2NB
FOXN4
FOXO6
FOXP1
FOXP2
FOXQ1
FRAT1
FRMD4A
FRMD4B
FRMD6
FRMPD1
FSCN2
FST
FSTL1
FSTL3
FSTL4
FXYD1
FXYD6
FXYD6-FXYD2
FXYD7
FZD8
GABBR2
GABRD
GADD45G
GADL1
GAL3ST4
GALNT12
GALNT14
GALNT16
GALNT3
GALNT6
GALNT9
GALR2
GALR3
GAMT
GAS1
GAS1RR
GATA3
GATA3-AS1
GATA4
GATA5
GATA6
GATA6-AS1
GATM
GBX1
GBX2
GCGR
GCKR
GDA
GDAP1L1
GDF6
GDF7
GDNF
GDNF-AS1
GFI1
GFPT2
GFRA2
GFY
GGTA1P
GIPC3
GJA1
GJB2
GJB6
GJC3
GJD2
GLB1L3
GLDN
GLI3
GLI4
GLIS1
GLP1R
GMDS
GNA14
GNAL
GNAO1
GNAS
GNG13
GOLGA7B
GP1BB
GPC2
GPM6B
GPR101
GPR12
GPR137B
GPR149
GPR153
GPR158
GPR158-AS1
GPR27
GPX7
GRASP
GREM1
GRHL2
GRID1
GRID2
GRID2IP
GRIK3
GRIK4
GRIK5
GRIN1
GRIN2C
GRIN2D
GRIN3B
GRM1
GRM4
GRM8
GS1-24F4.2
GSC
GSC2
GSG1L
GSPT2
GSX1
GSX2
GUCY1A2
GUCY1A3
GXYLT2
H19
HAAO
HAGHL
HAND1
HAP1
HAPLN2
HAR1A
HAR1B
HAS2
HAS2-AS1
HBA1
HBM
HBQ1
HCK
HCN2
HCN4
HDAC9
HECW1
HELT
HES2
HES3
HES5
HEY1
HEY2
HGF
HHIPL1
HIC1
HIF3A
HIST1H3I
HIST1H4L
HIVEP3
HLA-DPB2
HMCN1
HMCN2
HMGA2
HMX1
HMX2
HMX3
HNF4G
HOTAIR
HOTTIP
HOXA11
HOXA11-AS
HOXA13
HOXB8
HOXC11
HOXC8
HOXD-AS2
HOXD11
HOXD12
HOXD13
HPCA
HPGD
HPSE2
HR
HRAT92
HRH3
HRK
HS3ST3B1
HS3ST6
HS6ST3
HSD11B2
HSPA12A
HSPA12B
HTR1B
HTR1F
HTR5A
HTR5A-AS1
HTR6
HTR7
HTRA1
HTRA3
HTRA4
HUNK
HYDIN
HYMAI
ICOSLG
ID4
IDUA
IGDCC3
IGF1R
IGF2
IGF2-AS
IGF2BP1
IGF2BP3
IGFBP1
IGFBP2
IGFBP3
IGFBP5
IGFBP7
IGFBP7-AS1
IGLON5
IGSF11
IHH
IKZF1
IKZF3
IL13
IL17D
IL17RD
IL17REL
IL20RA
IL7
ILDR2
INA
INHBB
INS-IGF2
INSM1
INSM2
INSRR
IQSEC2
IQUB
IRAIN
IRF4
IRF8
IRX3
IRX4
IRX5
ISL2
ISLR2
ISM1
ISM2
ISOC2
ITGA11
ITGB2
ITGB8
ITIH5
ITPKA
JAKMIP1
JAKMIP3
JAM2
JPH1
JPH3
JSRP1
KAAG1
KALRN
KANK3
KANK4
KAZN
KCNA2
KCNA3
KCNA7
KCNB1
KCNB2
KCNC1
KCNC3
KCND3
KCNF1
KCNG1
KCNH2
KCNH3
KCNH4
KCNH7
KCNIP1
KCNJ10
KCNJ2
KCNJ2-AS1
KCNJ4
KCNJ5
KCNJ6
KCNJ9
KCNK1
KCNK10
KCNK12
KCNK13
KCNK16
KCNK17
KCNK2
KCNK3
KCNK4
KCNK4-TEX40
KCNK6
KCNMB4
KCNN1
KCNN3
KCNQ1
KCNQ2
KCNQ3
KCNQ4
KCNS2
KCNT1
KCTD1
KCTD16
KDELR1
KIAA1024
KIAA1211L
KIAA1217
KIAA1257
KIAA1324
KIAA1614
KIF1A
KIF21B
KIF26A
KIF7
KIFC2
KISS1R
KIT
KL
KLF15
KLF9
KLHDC8A
KLHL29
KLHL35
KLK10
KLK4
KLRG2
KREMEN1
KREMEN2
KRT77
KRT8P41
KRTAP5-AS1
L1CAM
L3MBTL4
LAD1
LAMB1
LAMC3
LBH
LBX1
LBX1-AS1
LBX2
LCA10
LCN10
LDLRAD4
LEF1
LEF1-AS1
LELP1
LFNG
LGI2
LGI3
LGR5
LGR6
LHX2
LHX3
LHX4
LHX5
LHX5-AS1
LHX6
LHX8
LHX9
LIMS2
LIN28A
LINC00092
LINC00261
LINC00334
LINC00463
LINC00475
LINC00535
LINC00554
LINC00599
LINC00682
LINC00693
LINC00866
LINC00982
LINC01018
LINC01020
LINC01056
LINC01081
LINC01082
LINC01096
LINC01116
LINC01117
LINC01141
LINC01143
LINC01151
LINC01159
LINC01166
LINC01181
LINC01210
LINC01276
LINC01311
LINC01314
LINC01315
LINC01389
LINC01391
LINC01397
LINC01412
LINC01456
LINC01475
LINC01547
LINC01574
LINC01586
LINC01607
LINC01664
LINC01686
LINC01749
LINC01750
LINC01798
LINC01918
LINC01973
LINC01979
LINC02036
LINC02106
LINC02121
LINC02135
LINC02202
LINC02210-CRHR1
LINGO1
LINGO3
LIPG
LKAAEAR1
LMF1
LMNTD2
LMO1
LMO2
LMX1B
LOC100126784
LOC100128593
LOC100128770
LOC100129175
LOC100129434
LOC100129697
LOC100130587
LOC100130705
LOC100131315
LOC100132111
LOC100132215
LOC100287944
LOC100288748
LOC100294362
LOC100505530
LOC100505585
LOC100505588
LOC100996724
LOC101926898
LOC101927248
LOC101927318
LOC101927437
LOC101927497
LOC101927583
LOC101927692
LOC101927793
LOC101927811
LOC101927870
LOC101928009
LOC101928134
LOC101928174
LOC101928177
LOC101928370
LOC101928416
LOC101928847
LOC101929076
LOC101929122
LOC101929234
LOC101929297
LOC101929524
LOC101929538
LOC101929748
LOC102723313
LOC102723373
LOC102724404
LOC105369438
LOC105369971
LOC105372383
LOC105373021
LOC105375800
LOC105377716
LOC105377879
LOC105378269
LOC107984640
LOC149950
LOC283028
LOC283045
LOC283731
LOC283856
LOC285484
LOC389332
LOC400706
LOC403312
LOC440461
LOC440934
LOC642366
LOC643802
LOC646548
LOC728392
LOC728739
LOC729652
LOC729870
LOR
LOX
LPL
LRP1B
LRP2
LRP3
LRP4
LRRC10B
LRRC26
LRRC32
LRRC4
LRRC43
LRRC4B
LRRC56
LRRC71
LRRN4
LSP1
LTBP4
LTK
LY86-AS1
LYL1
LYPD1
LYPD6B
MACF1
MACROD1
MAD2L2
MADCAM1
MAEL
MAFA
MAGI2
MAL2
MAMDC2
MAML3
MAN1A1
MAN1C1
MAP6
MAP7
MAPK11
MAPK4
MAPK8IP2
MAPRE2
MARCH9
MARVELD3
MAST1
MAST4
MATK
MBNL3
MC5R
MCC
MCF2L
MCF2L-AS1
MCF2L2
MCOLN2
MCTP1
MDGA1
MDGA2
MECOM
MEG8
MEGF11
MEIS1-AS3
MEIS3
METAP1D
METTL24
MEX3D
MFRP
MFSD4A
MGAT3
MGC12916
MIR1-1
MIR1-1HG
MIR1179
MIR1181
MIR1234
MIR124-1
MIR124-3
MIR1268A
MIR129-2
MIR132
MIR137
MIR137HG
MIR155HG
MIR203A
MIR203B
MIR212
MIR2682
MIR3131
MIR3621
MIR3663
MIR3663HG
MIR375
MIR378B
MIR378I
MIR4281
MIR4321
MIR4488
MIR4497
MIR4526
MIR4634
MIR4674
MIR4683
MIR4734
MIR4783
MIR483
MIR548G
MIR5680
MIR5691
MIR670
MIR6720
MIR6841
MIR7-2
MIR769
MIR7846
MIR9-1
MIR9-3HG
MIR92B
MIXL1
MKX
MKX-AS1
MLLT6
MLPH
MLXIPL
MME
MMP16
MMP24
MMP25
MMP28
MMP9
MNX1
MNX1-AS1
MPP2
MPPED1
MRAP2
MRGPRG
MRGPRG-AS1
MROH5
MS4A15
MSI1
MSX1
MSX2
MSX2P1
MT3
MTUS1
MTUS2
MUC1
MUC12
MUC17
MUC3A
MUC5AC
MYB
MYH11
MYO10
MYO5B
MYOCD
MYOD1
MYRIP
MYT1
MZF1
MZF1-AS1
N4BP3
NALT1
NANOS3
NAT16
NATD1
NAV2
NBPF10
NBPF20
NBPF25P
NBPF9
NCALD
NCAM1
NCKAP5
NDNF
NDRG2
NDRG4
NDUFA4L2
NDUFS7
NEFL
NEIL1
NELL2
NEURL1
NEURL1-AS1
NEUROD1
NEUROD2
NEUROD4
NEUROD6
NEUROG1
NEUROG2
NEUROG3
NFATC1
NFATC2
NFIX
NFKBIE
NGEF
NGFR
NHLH2
NHSL2
NID1
NID2
NIM1K
NIPAL4
NKAIN1
NKAIN2
NKAIN3
NKAIN4
NKD1
NKD2
NKX1-1
NKX1-2
NKX2-2
NKX2-3
NKX2-5
NKX3-2
NKX6-2
NLGN1
NLRP1
NMNAT2
NNMT
NOG
NOL4
NOL4L
NOS1
NOTCH1
NOTCH3
NOTO
NOTUM
NOVA2
NPAS1
NPAS2
NPAS3
NPAS4
NPFFR1
NPHS1
NPNT
NPPC
NPR1
NPR3
NPTX1
NPTX2
NPTXR
NPW
NR0B1
NR2F1
NR2F1-AS1
NR3C2
NR5A1
NRCAM
NREP
NRG1
NRG2
NRIP3
NRN1
NRP2
NRROS
NRXN2
NSG1
NT5C1A
NTN1
NTN3
NTN4
NTNG2
NTRK1
NTSR1
NUBPL
NXPH4
OBSCN
OGDHL
OLFM2
OLIG1
OLIG2
OLIG3
ONECUT1
ONECUT2
ONECUT3
OPRD1
OPRL1
OR4D1
OR6M1
OR6X1
OR8B8
OSBPL1A
OSR2
OSTM1-AS1
OTOP2
OTOP3
OTP
OTUD7A
OTX1
OTX2-AS1
OVCH2
OVOL1
OVOL1-AS1
OVOL2
P2RX2
P3H3
PALM2
PANK4
PAPLN
PAPPA
PAQR4
PAQR5
PARM1
PAX2
PAX3
PAX4
PAX5
PAX6
PAX7
PAX9
PBX1
PCAT19
PCBP3
PCDH1
PCDH8
PCP4L1
PCSK5
PCSK6
PCSK9
PDE1B
PDE2A
PDE3A
PDE4A
PDE4D
PDE4DIP
PDE8B
PDGFA
PDGFRA
PDIA2
PDZD2
PDZD4
PDZRN4
PEAR1
PEBP4
PELI2
PEX5L
PGBD5
PGGHG
PGR
PGR-AS1
PHACTR1
PHACTR3
PHF21B
PHF24
PHYHIPL
PIANP
PIK3CD
PIK3CD-AS1
PIP5K1B
PITX2
PKDCC
PKIB
PKNOX2
PKNOX2-AS1
PKP2
PLA2G7
PLAC9
PLAG1
PLAGL1
PLCG2
PLCH2
PLCL1
PLCXD3
PLD4
PLEKHA2
PLEKHD1
PLEKHG1
PLEKHO1
PLK5
PLPP4
PLUT
PLXDC1
PLXNA2
PLXNA4
PLXNC1
PLXND1
PMP22
PNMT
PNPLA5
PODXL
POMC
POP5
POU2F3
POU3F1
POU3F2
POU4F1
POU4F3
PP7080
PPARGC1A
PPFIA3
PPM1N
PPP1R13L
PPP1R14C
PPP1R16A
PPP1R16B
PPP1R17
PPP1R1A
PPP2R2C
PRDM1
PRDM12
PRDM13
PRDM16
PRDM6
PREX1
PRIMA1
PRKCG
PRKCH
PRKD1
PRKG1
PRKG2
PRLR
PRMT8
PROC
PROK2
PROKR1
PROKR2
PROM1
PROX1
PROX1-AS1
PRR18
PRR35
PRR5L
PRRT4
PRRX2
PRSS27
PRSS56
PRTN3
PRUNE2
PSD
PSD2
PSD2-AS1
PTCH1
PTCHD1
PTENP1
PTENP1-AS
PTGER2
PTGER3
PTH1R
PTH2
PTK7
PTP4A3
PTPN5
PTPRB
PTPRM
PTPRN2
PTPRU
PTPRZ1
PVALB
PYCARD
PYCARD-AS1
PYGM
PYY
QRFP
QRFPR
RAB11FIP4
RAB37
RAB39A
RAB3C
RAI2
RALGAPA1
RAMP1
RAMP2
RAMP2-AS1
RAP1GAP
RAP1GAP2
RAPGEF4
RAPGEF4-AS1
RARB
RASAL3
RASD2
RASGEF1A
RASGEF1B
RASGRF1
RASGRF2
RASGRF2-AS1
RASGRP2
RASL10A
RASSF10
RASSF5
RAX
RBFOX3
RBM20
RBP4
RCAN2
RCOR2
RCSD1
RDH8
REEP1
RELN
RET
RETREG1
RFLNA
RFTN1
RFX4
RFX6
RGCC
RGMA
RGS19
RGS6
RGS7BP
RGS9BP
RHBDL3
RIC3
RIMS1
RING1
RIPK4
RIPOR2
RNF128
RNF144A
RNF144A-AS1
RNF157-AS1
RNF165
RNF180
RNF182
RNF219-AS1
RNF220
RNF39
RNU5F-1
ROBO3
ROR2
RORA
RORA-AS1
RORB
RORB-AS1
RPH3A
RPL38
RPRML
RPS6KA2
RPSAP52
RRAD
RRAGD
RSF1
RSPO1
RSPO3
RSPO4
RSRC1
RTBDN
RTN1
RTN2
RTN4RL1
RTN4RL2
RUNX1T1
RUNX2
RXRB
RYR1
RYR3
S1PR1
SAMD11
SAMD14
SAMD3
SARM1
SATB1
SATB1-AS1
SBK1
SBSPON
SCARA3
SCARF2
SCGB3A1
SCN1B
SCN3B
SCN4B
SCNN1B
SCNN1G
SCRT1
SCRT2
SCTR
SCUBE1
SCUBE2
SCUBE3
SDC2
SDK1
SDK2
SEC31B
SELENOV
SEMA3F
SEMA3F-AS1
SEMA5B
SEMA6A
SEMA6C
SENCR
SEPT4
SEPT4-AS1
SEPT5
SEPT5-GP1BB
SERPINE2
SERTAD4
SERTAD4-AS1
SERTM1
SEZ6L
SFRP5
SFTA3
SGCZ
SGPP2
SH2B2
SH2D3C
SH3GL2
SH3PXD2A
SHANK1
SHANK3
SHC2
SHC3
SHD
SHE
SHH
SHISA3
SHISA7
SHISA8
SHOX2
SIDT1
SIGIRR
SIGLEC15
SIM2
SKOR1
SKOR2
SLC10A4
SLC12A5
SLC15A1
SLC16A11
SLC16A12
SLC16A7
SLC16A8
SLC16A9
SLC17A7
SLC18A3
SLC1A2
SLC1A3
SLC1A6
SLC22A23
SLC22A31
SLC24A4
SLC25A48
SLC25A53
SLC26A10
SLC26A4
SLC26A4-AS1
SLC26A5
SLC30A10
SLC30A2
SLC30A3
SLC30A8
SLC32A1
SLC34A2
SLC35D3
SLC35F1
SLC37A2
SLC40A1
SLC43A1
SLC44A5
SLC45A2
SLC47A1
SLC4A8
SLC6A1
SLC6A11
SLC6A20
SLC6A3
SLC6A4
SLC6A5
SLC7A10
SLC7A2
SLC8A2
SLC8A3
SLC9A3
SLC9A3-AS1
SLFN11
SLIT1
SLIT3
SMAD6
SMARCD3
SMIM24
SMOC1
SMPD3
SMTNL2
SNAI3
SNAI3-AS1
SNAP91
SNAPC2
SNCAIP
SNCB
SND1
SNED1
SNORA99
SNTB1
SNX31
SOBP
SOHLH1
SORCS2
SOST
SOWAHA
SOWAHB
SOX14
SOX17
SOX18
SOX2
SOX2-OT
SOX21
SOX21-AS1
SOX3
SOX5
SOX7
SOX8
SP6
SP8
SP9
SPATA18
SPATC1
SPATC1L
SPINT1
SPNS2
SPOCK2
SPON1
SPON2
SPRN
SPRR2F
SPRR2G
SPSB4
SPTBN4
SPTSSB
SRCIN1
SRD5A2
SRGAP2-AS1
SRP68
SRPK3
SRRM3
SSBP2
SSBP3
SSPO
SST
SSTR2
SSTR5
SSTR5-AS1
ST14
ST3GAL1
ST6GALNAC2
ST8SIA1
ST8SIA4
STAC3
STAT5A
STEAP2-AS1
STK3
STMN2
STMN3
STUM
STXBP5L
SULF2
SULT4A1
SUSD4
SUSD5
SV2B
SV2C
SVEP1
SYK
SYMPK
SYNDIG1L
SYNE1
SYPL2
SYT13
SYT14
SYT15
SYT2
SYT3
SYT6
SYT7
TAC1
TAC4
TAL1
TBC1D1
TBC1D16
TBR1
TBX1
TBX2
TBX2-AS1
TBX21
TC2N
TCF20
TCF4
TCHH
TCTE1
TDH
TDRD10
TEKT1
TEKT3
TENM2
TENM3
TESC
TESC-AS1
TET1
TEX22
TFCP2L1
TGFBR3L
TH2LCRR
THBS4
THCAT155
THPO
THRB
THRB-AS1
TINCR
TJP1
TJP3
TLE3
TLL1
TLL2
TLX1
TLX1NB
TLX2
TLX3
TM6SF1
TMED3
TMEFF2
TMEM102
TMEM121
TMEM130
TMEM150C
TMEM151A
TMEM151B
TMEM163
TMEM170B
TMEM171
TMEM178A
TMEM178B
TMEM179
TMEM181
TMEM200A
TMEM200C
TMEM220
TMEM220-AS1
TMEM221
TMEM229A
TMEM229B
TMEM233
TMEM30B
TMEM59L
TMEM74
TMEM74B
TMEM98
TMOD1
TMPRSS2
TNFAIP8L3
TNFRSF13C
TNFRSF18
TNFRSF19
TNFRSF1B
TNR
TNXB
TOX3
TP53INP1
TP73
TPBGL
TPPP
TRABD2B
TRANK1
TRH
TRIB2
TRIM36
TRIM67
TRIM71
TRPC3
TRPC6
TRPM2
TRPM3
TRPS1
TRPV4
TSHZ1
TSLP
TSNARE1
TSPAN9
TSPEAR
TSPOAP1
TSPOAP1-AS1
TTC39A
TTC9B
TTF1
TTLL11
TTLL9
TTN
TTYH1
TUBA8
TUBB2B
TXNIP
UBE2QL1
UCP1
ULBP2
UNC13A
UNC5A
UNC5B
UNC5B-AS1
[truncated: 85 more rows]

## Sheet: SUZ12 targets (shCTR)
List of 41 genes marked by SUZ12 ChIPseq in control conditions (shCTR)
ATF3
BCL11A
BEGAIN
CBX4
CBX8
CCND2
CCND2-AS1
DLL1
DUSP4
EFNA3
EMX1
FAM120B
FLRT2
FOXB1
FOXC1
FOXCUT
FOXI3
FOXL2
FOXL2NB
FSTL4
GATA3-AS1
GRHL2
IGF2BP3
INHBB
LINC00092
LINC01391
MDGA2
NBPF25P
NOTUM
NTNG2
PAX2
PAX5
PAX7
PCDH1
PRDM12
PTPRN2
RHBDL3
SLC7A2
SOX2
SOX2-OT
TBX1

## Sheet: SUZ12 targets (shPHF19)
List of 567 genes marked by SUZ12 ChIPseq iafter PHF19 KD (shPHF19)
AARS2
ABHD12B
ABLIM2
ABO
ABR
ACHE
ACOXL
ADAMTS7
ADAMTS8
ADCYAP1
ADGRA1
ADGRA1-AS1
ADRA1A
AGAP2
AHRR
AKAP6
ALK
ALKAL1
ALOX5
ALX4
AMH
AMN
ANKRD19P
ANO1
ANO1-AS2
ANO2
APC2
APCDD1
ARHGEF7
ARHGEF7-AS2
ARID3C
ARX
ATF3
ATP6V1C2
BARHL1
BARX1
BARX1-AS1
BCL11A
BCL11B
BEGAIN
BHLHE41
BICDL2
BLACAT1
BMP4
BMP6
BMP7
BSX
C11orf96
C15orf59
C19orf25
C20orf166-AS1
C2CD4B
C2CD4C
C3orf70
CABP1
CABP7
CACNA1B
CACNA1G
CACNA1G-AS1
CACNA2D1
CACNA2D3
CADM3
CAMK2B
CAMK2N2
CASC15
CASC23
CATSPERZ
CBFA2T3
CBX4
CBX8
CCDC177
CCDC85A
CCK
CCND2
CCND2-AS1
CDH22
CDK5R2
CDK6
CECR6
CFAP73
CFAP77
CHD5
CHRD
CHRNA3
CHRNB2
CHST8
CLDN7
CMPK2
CNPY1
CNR1
CNTD2
CNTFR
COL15A1
COL19A1
COL2A1
COL4A1
COL4A2
COL5A3
COL9A3
COMP
CPZ
CRABP1
CRHR1
CRNDE
CRTAC1
CRYBA2
CTTNBP2
CUX2
CXXC5
CYP26B1
CYS1
DGKI
DHH
DIGIT
DKFZP434H168
DLGAP3
DLGAP4
DLL1
DLX3
DNAJC22
DNER
DOC2B
DPYSL5
DRAXIN
DUSP15
DUSP4
EBF1
EBF3
ECE2
EDARADD
EFNA2
EFNA3
EGLN3
EGR3
EGR4
EMILIN2
EMX1
EMX2
EMX2OS
EN2
EPHA8
EPOP
ESR1
ESRP1
EYA4
FAM120B
FAM131B
FAM174B
FAM189A1
FAM20A
FBN3
FBXL16
FDXR
FENDRR
FEV
FEZF2
FGF18
FGF3
FGF8
FGF9
FGFR2
FGFR3
FIBCD1
FLRT2
FLT4
FNDC1
FOXA2
FOXB1
FOXB2
FOXC1
FOXCUT
FOXF1
FOXF2
FOXI3
FOXL2
FOXL2NB
FOXP2
FOXQ1
FSCN2
FSTL4
FXYD6
FXYD6-FXYD2
FZD8
GABBR2
GALR2
GATA3-AS1
GATA5
GBX1
GCGR
GDF7
GDNF
GDNF-AS1
GFI1
GGTA1P
GJB6
GJC3
GJD2
GLI3
GLI4
GNA14
GNAL
GNAO1
GNG2
GRHL2
GRID1
GRIK5
GRIN1
GRIN2C
GRM4
GRM8
GSC
GUCY1A2
HAND1
HAP1
HAPLN2
HAR1A
HAR1B
HCN4
HES3
HIC1
HR
HRAT92
HRK
HS3ST6
HS6ST3
HTR6
HTRA3
HUNK
HYDIN
ICOSLG
IDUA
IGDCC3
IGF2
IGF2-AS
IGF2BP1
IGF2BP3
IGFBP3
IHH
IKZF1
IKZF3
IL20RA
ILDR2
INA
INHBB
INS-IGF2
IRF8
IRX3
IRX5
ISLR2
ISM1
JSRP1
KANK3
KANK4
KCNH3
KCNJ4
KCNK12
KCNK13
KCNK4
KCNK4-TEX40
KCNN1
KCNQ2
KCNQ3
KCNS2
KCTD1
KCTD16
KIF1A
KIF26A
KLF15
KLHL35
KLK10
KRT8P41
LAD1
LBH
LBX1
LBX1-AS1
LDLRAD4
LEF1
LEF1-AS1
LGR5
LHX2
LHX3
LHX4
LHX5
LHX5-AS1
LHX6
LINC00092
LINC00535
LINC00609
LINC01210
LINC01276
LINC01314
LINC01391
LINC01664
LINC01798
LINC02036
LINC02202
LINC02210-CRHR1
LINGO1
LINGO3
LMO1
LMX1B
LOC100128770
LOC100129434
LOC100129697
LOC100287944
LOC100288748
LOC100505588
LOC100996724
LOC101927248
LOC101927497
LOC101927870
LOC101928174
LOC101928177
LOC101929076
LOC101929122
LOC101929748
LOC102723313
LOC105378269
LOC283028
LOC283731
LOC283856
LOC389332
LOC400706
LOC440461
LOC646548
LOR
LPL
LRP2
LRP4
LRRC26
LTK
LYPD1
MACROD1
MAD2L2
MAEL
MAFA
MAP6
MAPK4
MARVELD3
MDGA2
MECOM
MIR1-1
MIR1-1HG
MIR1234
MIR124-3
MIR129-2
MIR203A
MIR203B
MIR3131
MIR3621
MIR4321
MIR4634
MIR4683
MIR5691
MIR6720
MIR6841
MIR9-3HG
MIXL1
MKX
MKX-AS1
MMP25
MNX1
MSI1
MSX1
MYO5B
MYOCD
NAT16
NBPF20
NBPF25P
NBPF9
NDRG4
NEFL
NEUROD2
NEUROG1
NEUROG2
NFATC1
NGFR
NIM1K
NKAIN1
NKX1-2
NKX2-2
NOTO
NOTUM
NPAS1
NPAS3
NPNT
NPR1
NPTX1
NPTX2
NR3C2
NRCAM
NSG1
NTNG2
NUBPL
OLIG1
ONECUT2
ONECUT3
OPRD1
OSTM1-AS1
OVOL1
OVOL1-AS1
OVOL2
PAX2
PAX5
PAX7
PCDH1
PCSK9
PDE4DIP
PDE8B
PDGFA
PELI2
PGBD5
PGR
PGR-AS1
PHACTR1
PHF21B
PHF24
PIP5K1B
PKNOX2
PKNOX2-AS1
PLCL1
PLCXD3
PLXNA4
PLXNC1
PP7080
PPARGC1A
PPP2R2C
PRDM12
PRDM6
PRKG1
PROK2
PRR35
PRUNE2
PSD
PSD2
PTH1R
PTPRN2
PTPRU
PVALB
PYGL
RAP1GAP
RARB
RASGEF1B
RASGRP2
RDH8
RET
RFX4
RGS6
RHBDL3
RIPOR2
RNF39
ROBO3
RORA
RORA-AS1
RPRML
RSPO1
RSPO3
RTN1
RTN4RL1
RTN4RL2
RUNX1T1
SAMD11
SATB1
SATB1-AS1
SCARF2
SCRT1
SCUBE2
SDK2
SEMA5B
SHC2
SHC3
SHE
SHH
SKOR1
SLC15A1
SLC16A8
SLC1A2
SLC1A3
SLC26A1
SLC26A5
SLC30A2
SLC30A3
SLC35D3
SLC35F1
SLC40A1
SLC43A1
SLC45A2
SLC6A4
SLC7A10
SLC7A2
SLC8A3
SLC9A3
SLC9A3-AS1
SNAPC2
SNCAIP
SNTB1
SOX18
SOX2
SOX2-OT
SOX21
SOX21-AS1
SOX5
SOX7
SP8
SRD5A2
SRGAP2-AS1
SRP68
SSTR2
ST14
STMN3
STUM
SULF2
SV2C
SVEP1
SYK
SYT2
SYT6
TBX1
TC2N
TCHH
TCTE1
TDRD10
TESC
TESC-AS1
TGFBR3L
THBS4
THPO
TINCR
TJP1
TM6SF1
TMEM151B
TMEM178B
TMEM181
TMEM59L
TMOD1
TMPRSS2
TNFAIP8L3
TNXB
TP73
TRIB2
TRIM67
TSPEAR
TTC9B
TTLL9
TUBB2B
UNC5A
UNC5B
VENTX
VGLL2
VWA5B2
WDR86
WDR86-AS1
WNT1
WNT6
WNT7A
WNT9B
WRAP73
WTIP
ZACN
ZBTB16
ZBTB7C
ZDHHC22
ZFHX4
ZFHX4-AS1
ZFPM1
ZNF423
ZNF469

## Sheet: MTF2 targets (shCTR)
List of 2011 genes marked by MTF2 ChIPseq in control conditions (shCTR)
AAMDC
AARS2
AASS
ABCA13
ABCC5
ABCG1
ABHD12B
ABHD17B
ABHD3
ABLIM1
ABO
ABR
ACACA
ACACB
ACADL
ACBD6
ACHE
ACKR3
ACOXL
ADAM22
ADAMTS12
ADAMTS16
ADAMTS19
ADAMTS20
ADAMTS6
ADAMTS8
ADAMTS9
ADAMTS9-AS2
ADAMTSL3
ADARB2
ADCY2
ADCY8
ADCYAP1
ADCYAP1R1
ADD3-AS1
ADGRA1
ADGRA1-AS1
ADGRA2
ADGRE1
ADRA1A
ADTRP
AFTPH
AGAP2
AGXT2
AHR
AIG1
AIM2
AKAP13
AKAP2
AKAP6
ALK
ALKAL1
ALKAL2
ALOX5
ALX4
AMER2
AMER3
AMH
AMN
AMPH
AMZ1
ANK3
ANKIB1
ANKRD19P
ANKRD34C
ANKRD34C-AS1
ANKRD42
ANKS1A
ANKS1B
ANO1
ANO1-AS2
ANO2
ANO4
ANO6
ANO9
ANTXR1
AP1M2
APBA1
APBB1IP
APBB2
APC2
APCDD1
APCS
APLP2
APP
ARHGAP20
ARHGAP26
ARHGAP42
ARHGAP5
ARHGAP9
ARHGEF12
ARHGEF26
ARHGEF26-AS1
ARHGEF3
ARHGEF7
ARHGEF7-AS2
ARID3C
ARID4A
ARID5B
ARL15
ARMC4P1
ARNT
ARNT2
ARX
ASAP1
ASB4
ASCL4
ASIC4
ATAD2B
ATE1
ATF3
ATF7
ATG2B
ATL1
ATP13A5
ATP2B2
ATP2C2
ATP6V1C2
ATP8B5P
ATXN1
ATXN7
ATXN7L1
AXIN2
B3GNT7
B4GALT6
BAALC
BACH2
BAMBI
BARHL1
BARX1
BARX1-AS1
BASP1
BAZ1A
BCAS3
BCAT1
BCL11A
BCL11B
BCL2
BCL9
BEGAIN
BEND4
BEND6
BHLHE41
BICDL2
BLACAT1
BLMH
BMI1
BMP2
BMP4
BMP6
BMP7
BMPER
BMPR1B
BMPR1B-AS1
BNC1
BNC2
BPIFA4P
BRCAT54
BRE
BRWD1
BSX
BTAF1
BTBD9
BTG4
BUB3
C10orf11
C10orf76
C11orf70
C11orf74
C11orf88
C11orf96
C11orf97
C14orf37
C15orf38-AP3S2
C15orf59
C19orf25
C1QTNF2
C1QTNF7
C1orf21
C1orf87
C20orf166-AS1
C2CD3
C2CD4A
C2CD4B
C2CD4C
C3orf70
C4orf19
C5orf30
C5orf42
C5orf63
C5orf64
C6
C7
C8orf37-AS1
C8orf44-SGK3
C9
C9orf3
C9orf41-AS1
CA4
CABP1
CABP7
CACNA1A
CACNA1B
CACNA1C
CACNA1E
CACNA1H
CACNA2D1
CACNA2D3
CACNB4
CACNG2
CACNG4
CADM1
CADM3
CADPS
CADPS2
CALCR
CALD1
CALY
CAMK2B
CAMK2D
CAMK4
CAMKMT
CAMTA1
CAPSL
CARMIL1
CARNMT1
CASC15
CASC8
CASR
CATSPERZ
CAV1
CAV2
CBFA2T3
CBX2
CBX4
CBX8
CCDC112
CCDC140
CCDC149
CCDC177
CCDC192
CCDC26
CCDC50
CCDC85A
CCK
CCKBR
CCND2
CCND2-AS1
CCNK
CD1A
CD1D
CD38
CD5L
CDC42EP5
CDH12
CDH13
CDH18
CDH20
CDH22
CDH23
CDK13
CDK14
CDK17
CDK5R2
CDK6
CDKAL1
CDX2
CEACAM21
CEBPA
CEBPA-AS1
CECR2
CELF2
CELF5
CENPF
CEP112
CEP120
CFAP43
CFAP54
CFAP65
CFAP77
CFDP1
CHD1L
CHD5
CHD6
CHGB
CHL1
CHL1-AS2
CHMP4C
CHRD
CHRM4
CHRNA3
CHRNA4
CHRNA7
CHST1
CHST8
CHST9
CIITA
CISTR
CITED1
CLDN10
CLDN5
CLIC5
CLPB
CLRN1-AS1
CLTC
CLVS1
CMAHP
CMPK2
CNIH3
CNPY1
CNR1
CNTD2
CNTN1
CNTN2
CNTN5
COCH
COG5
COL11A2
COL15A1
COL19A1
COL2A1
COL4A1
COL4A2
COL5A3
COL6A4P1
COL8A1
COL9A3
COLEC10
COMMD1
COMMD3-BMI1
COMP
CORIN
CORO2B
COX10
CPA6
CPAMD8
CPEB1-AS1
CPEB3
CPEB4
CPED1
CPVL
CPZ
CR2
CRABP1
CRADD
CREB5
CRHR1
CRHR2
CRIM1
CRLF1
CRNDE
CRTAC1
CRY1
CRYBA2
CSGALNACT1
CSGALNACT2
CSNK2A1
CTD-2297D10.2
CTDSPL
CTNNA1
CTNNA3
CTNND2
CTTNBP2
CUBN
CUX2
CXCL14
CXCR4
CXXC5
CYP19A1
CYP1B1-AS1
CYP24A1
CYP26A1
CYP26B1
CYP4F22
DAAM1
DACT1
DBX1
DBX2
DCAF10
DCBLD1
DCLK1
DDAH1
DDHD1
DDR2
DEC1
DEFB123
DENND1A
DENND2A
DENND5B
DGKG
DGKI
DHH
DHX57
DIAPH1
DICER1
DIGIT
DIP2B
DISC1
DKFZP434H168
DKFZp686K1684
DLC1
DLG1
DLG3
DLGAP1
DLGAP3
DLGAP4
DLL1
DLX1
DLX3
DLX6-AS1
DMBT1
DMRT3
DNAH11
DNAH5
DNAH8
DNAI1
DNAJC22
DNAJC25
DNAJC25-GNG10
DNAJC5B
DNER
DNTT
DOC2B
DOCK1
DOCK10
DOCK2
DOCK4
DPF1
DPF3
DPY19L2P4
DPYSL4
DPYSL5
DRAXIN
DRGX
DROSHA
DSC2
DSCAML1
DSCAS
DSCC1
DSG2
DSP
DST
DTNA
DTNB
DTX1
DTX4
DUOX1
DUOX2
DUOXA1
DUOXA2
DUSP15
DUSP26
DUSP4
DUSP8
DUT
DYNC1I1
EBF1
EBF2
EBF3
ECEL1P2
EFCAB5
EFEMP1
EFHD1
EFNA3
EFNA5
EFNB2
EGFEM1P
EGFL6
EGFR
EGLN1
EGLN3
EGR3
EIF4A2
ELL2
ELMO1
ELMOD1
ELOVL2
EMILIN2
EML6
EMX1
EMX2
EMX2OS
EN2
ENAH
ENTPD1-AS1
EPB41L4A
EPB41L4A-AS2
EPB41L4B
EPHA1-AS1
EPHA8
EPHB3
EPHX3
ERBIN
ERFE
ERG
ERMP1
ESPN
ESPNP
ESR1
ESRP1
ESRRB
ESRRG
ETS1
EVA1A
EXOC3L2
EXOC6
EXOC6B
EXT1
EYA4
EZH2
F13A1
F5
FAM104B
FAM110C
FAM120B
FAM131B
FAM13A
FAM13C
FAM155B
FAM159B
FAM162B
FAM168A
FAM172A
FAM174B
FAM184B
FAM189A1
FAM189A2
FAM192A
FAM196A
FAM19A2
FAM19A4
FAM205BP
FAM205C
FAM208B
FAM20A
FAM217B
FAM3C
FAM47E
FAM47E-STBD1
FAM49B
FAM71D
FAM81A
FAM83B
FAM91A1
FARS2
FAXC
FBN2
FBN3
FBXL16
FBXL17
FBXO34
FBXO38
FBXO39
FBXO4
FCHSD2
FCRL3
FCRL4
FDXR
FENDRR
FER1L6
FER1L6-AS1
FER1L6-AS2
FERMT2
FEV
FEZF2
FGD6
FGF12
FGF14
FGF18
FGF20
FGF3
FGF8
FGF9
FGFR2
FGFR3
FGR
FHOD3
FKBP5
FKTN
FLI1
FLJ22447
FLRT2
FLT3
FLT4
FMN1
FMN2
FMO5
FMOD
FNBP1
FNDC1
FOXA2
FOXB1
FOXB2
FOXC1
FOXCUT
FOXF2
FOXG1-AS1
FOXI3
FOXL2
FOXL2NB
FOXN2
FOXN4
FOXP1
FOXP2
FOXQ1
FREM3
FRG1BP
FRMD3
FRMD4A
FRMD4B
FRMD6
FRMD6-AS2
FRMPD1
FRY
FRYL
FSCN2
FST
FSTL1
FSTL4
FUT8
FXYD6
FXYD6-FXYD2
FYB
FZD8
GAB1
GABBR2
GADL1
GALNT10
GALNT9
GALR2
GAREM1
GARNL3
GARS
GAS1
GAS1RR
GATA3
GATA3-AS1
GATA4
GATA5
GBX1
GCGR
GCLC
GDA
GDF7
GDNF
GDNF-AS1
GFI1
GFRA2
GGTA1P
GHR
GIMAP7
GJA1
GJB2
GJB6
GJC3
GJD2
GLI3
GLI4
GLP1R
GLRA1
GLRB
GMDS
GNA14
GNAL
GNAO1
GNAQ
GNAS
GNE
GNG12-AS1
GNG2
GOLIM4
GOLPH3
GPATCH2L
GPHN
GPM6B
GPR149
GPR153
GREB1L
GRHL2
GRID1
GRIK1
GRIK2
GRIK5
GRIN2B
GRIN2C
GRIN3A
GRIP1
GRM4
GRM8
GSC
GSDMC
GSG1L
GSPT2
GSX2
GTF2A1
GTF2E2
GUCY1A2
GXYLT2
GYG1
HABP2
HAND1
HAPLN1
HAPLN2
HAR1A
HAR1B
HAS2
HAS2-AS1
HBM
HCK
HCN4
HDAC9
HECTD1
HECTD2-AS1
HECW1
HECW2
HELT
HERC1
HERC4
HERPUD2
HES3
HES5
HEY1
HEY2
HGF
HHAT
HIC1
HIST1H3I
HIST1H4L
HLA-DPB2
HLA-DQB1
HLX-AS1
HMCN1
HMCN2
HMG20A
HMGA2
HMX1
HMX2
HMX3
HOMER1
HOXD-AS2
HOXD13
HOXD8
HPGD
HPSE2
HR
HRASLS5
HRAT92
HRK
HS3ST6
HS6ST3
HSF2
HSPA12B
HTR1B
HTR4
HTR7
HTRA3
HUNK
HYDIN
HYLS1
HYMAI
ICOSLG
ID4
IDUA
IFI16
IFT80
IFT81
IGF2
IGF2-AS
IGF2BP1
IGF2BP3
IGFBP2
IGFBP3
IGFBP5
IGFBP7
IGFBP7-AS1
IGFL3
IGFL4
IGSF11
IHH
IKZF1
IKZF3
IL12A-AS1
IL12RB2
IL15
IL17D
IL17REL
IL1RAP
IL20RA
IL20RB
IL7
ILDR2
IMMP2L
IMPAD1
INA
INHBA
INHBA-AS1
INHBB
INPP4B
INS-IGF2
INSM1
INSRR
INTS4P2
INVS
IPMK
IQCJ
IQCJ-SCHIP1
IQGAP2
IQSEC2
IQUB
IRF8
IRX3
IRX5
ISLR2
ISM1
ISPD
ITFG1
ITGA1
ITGA2
ITGB8
ITGBL1
ITIH5
ITK
JAK1
JAKMIP3
JAM3
JARID2
JAZF1
JMJD1C
JPH1
JPH3
JSRP1
KANK3
KANK4
KANSL1
KAT6B
KCNA2
KCNA7
KCNAB1
KCND3
KCNH1
KCNIP1
KCNJ15
KCNJ2
KCNJ2-AS1
KCNJ4
KCNJ6
KCNK1
KCNK10
KCNK12
KCNK13
KCNK2
KCNK4
KCNK4-TEX40
KCNMA1
KCNMB2
KCNMB2-AS1
KCNN1
KCNN3
KCNQ1
KCNQ2
KCNQ3
KCNQ5
KCNS2
KCTD1
KCTD16
KDELC2
KDM7A
KIAA0368
KIAA0391
KIAA0825
KIAA1024
KIAA1328
KIAA1614
KIF1A
KIF21A
KIF26A
KIF5C
KL
KLF12
KLF15
KLHL14
KLHL3
KLHL32
KLK10
KLK4
KRT77
KRTAP5-AS1
KSR2
L1CAM
L3MBTL4
LAD1
LAMA3
LBH
LBX1
LBX1-AS1
LCA10
LCE6A
LCLAT1
LCOR
LCORL
LCP2
LDAH
LDLRAD4
LEF1
LEF1-AS1
LEKR1
LELP1
LGR4
LGR5
LGR6
LHFPL3
LHX2
LHX3
LHX4
LHX5
LHX5-AS1
LHX6
LHX9
LIFR
LIFR-AS1
LIMCH1
LIN7A
LINC-PINT
LINC00092
LINC00261
LINC00299
LINC00437
LINC00474
LINC00504
LINC00519
LINC00533
LINC00534
LINC00535
LINC00554
LINC00578
LINC00609
LINC00624
LINC00632
LINC00824
LINC00842
LINC00886
LINC00927
LINC01020
LINC01056
LINC01081
LINC01082
LINC01096
LINC01121
LINC01141
LINC01143
LINC01146
LINC01166
LINC01167
LINC01168
LINC01182
LINC01210
LINC01255
LINC01276
LINC01314
LINC01331
LINC01391
LINC01397
LINC01412
LINC01448
LINC01456
LINC01475
LINC01476
LINC01483
LINC01500
LINC01607
LINC01619
LINC01749
LINC01750
LINC01798
LINC01873
LINC01933
LINC01973
LINC02015
LINC02036
LINC02097
LINC02102
LINC02119
LINC02121
LINC02135
LINC02150
LINC02202
LINC02210-CRHR1
LINGO1
LINGO3
LIPG
LKAAEAR1
LMBRD2
LMF1
LMO1
LMO7
LMX1B
LNX1
LOC100128714
LOC100128770
LOC100129434
LOC100129697
LOC100130587
LOC100131047
LOC100133286
LOC100287944
LOC100288748
LOC100288798
LOC100505588
LOC100505938
LOC100506071
LOC100506207
LOC100506403
LOC100507065
LOC100507291
LOC100996724
LOC101926942
LOC101927066
LOC101927079
LOC101927157
LOC101927243
LOC101927248
LOC101927437
LOC101927497
LOC101927811
LOC101927870
LOC101927884
LOC101928009
LOC101928075
LOC101928134
LOC101928174
LOC101928177
LOC101928370
LOC101928438
LOC101928509
LOC101928516
LOC101928583
LOC101928882
LOC101929076
LOC101929095
LOC101929122
LOC101929163
LOC101929541
LOC101929710
LOC101929748
LOC102723313
LOC102724163
LOC105369473
LOC105373021
LOC105374205
LOC105375734
LOC105377621
LOC105377716
LOC105377879
LOC105377975
LOC105378269
LOC145845
LOC283028
LOC283299
LOC283731
LOC283856
LOC285484
LOC339529
LOC339862
LOC340512
LOC389332
LOC400706
LOC401324
LOC439933
LOC440461
LOC441204
LOC441242
LOC642366
LOC643339
LOC646548
LOC648987
LOC728730
LOC728739
LOC729970
LOC730102
LOR
LPAR1
LPL
LPP
LRCH3
LRGUK
LRMP
LRP2
LRP4
LRRC10B
LRRC28
LRRC4B
LRRC8D
LRRK2
LRRN4
LTBP1
LTK
LY75-CD302
LY86-AS1
LYPD1
LYPD6B
LYST
MACROD1
MAD2L2
MAEL
MAFA
MAGI2
MAL2
MAMDC2
MAML2
MAML3
MAN1A1
MAN1C1
MAN2A1
MAP2K4
MAP3K21
MAP4K5
MAP6
MAP7
MAPK4
MAPKAP1
MAPRE2
MARCKS
MARK1
MARVELD3
MAST4
MAT2B
MBNL3
MC5R
MCC
MCTP1
MDFIC
MDGA2
MDH1
ME3
MECOM
MED12L
MED13L
MED27
MEF2C-AS1
MEGF10
MEGF9
MEIS1-AS3
MEIS2
MEIS3
MERTK
MET
METAP1D
METTL24
METTL3
MIA2
MIA3
MIER3
MIPOL1
MIR1-1
MIR1-1HG
MIR100HG
MIR1234
MIR124-1
MIR124-3
MIR129-2
MIR1299
MIR137
MIR137HG
MIR155HG
MIR17HG
MIR203A
MIR203B
MIR204
MIR2682
MIR3131
MIR3663HG
MIR3681HG
MIR378B
MIR4321
MIR4488
MIR4526
MIR4634
MIR4683
MIR4783
MIR5095
MIR5096
MIR548F3
MIR548G
MIR548H1
MIR548H4
MIR670
MIR6720
MIR6841
MIR9-3HG
MKLN1
MKX
MKX-AS1
MLIP
MME
MMP16
MMP24
MMP25
MNAT1
MNX1
MORC2-AS1
MPP7
MPPED1
MPZL1
MROH2B
MROH9
MRPS28
MS4A15
MS4A3
MSANTD3-TMEFF1
MSC-AS1
MSI1
MSRB3
MSX1
MSX2
MSX2P1
MTMR2
MTUS2
MUC5AC
MXI1
MYB
MYH11
MYHAS
MYL12B
MYLK
MYO18B
MYO1B
MYO5A
MYO5B
MYRFL
N4BP1
NAT16
NAV2
NAV3
NBEA
NBPF10
NBPF20
NBPF25P
NBPF8
NBPF9
NCALD
NCKAP5
NCOA5
NCOA7
NDRG4
NDUFAF5
NEDD1
NEFL
NEK7
NEO1
NEUROD2
NEUROD4
NEUROG1
NEUROG2
NEUROG3
NFASC
NFATC1
NGFR
NIN
NIPAL2
NIPBL
NIPSNAP3B
NKAIN1
NKAIN2
NKAIN3
NKX1-2
NKX2-2
NKX2-3
NKX3-2
NLGN1
NLN
NMNAT2
NNMT
NNT
NOL4
NOTO
NOTUM
NOX5
NPAS1
NPAS3
NPHS2
NPL
NPNT
NPR1
NPR3
NPTX1
NPTX2
NPW
NR3C2
NR5A2
NRCAM
NREP
NRG2
NRIP1
NRN1
NRP2
NRXN2
NSG1
NSMAF
NSUN2
NTN4
NTNG2
NTRK1
NTSR1
NUBPL
NUDT21
NUMB
OGFR
OGFRL1
OLIG1
OLIG2
OLIG3
ONECUT2
ONECUT3
OPCML
OPRD1
OPRL1
OR1N2
OR4D1
OR6X1
OR8B12
ORC5
OSBPL6
OSMR
OSMR-AS1
OSTF1
OSTM1-AS1
OTOP3
OTP
OTUD7A
OTUD7B
OTX2-AS1
OVCH2
OVOL1
OVOL1-AS1
OVOL2
OXCT1
OXGR1
OXR1
P4HA3
P4HA3-AS1
PAG1
PAH
PAIP1
PAK1
PALM2
PALM2-AKAP2
PAMR1
PANK1
PANK4
PAPPA
PAPPA2
PARD3
PARM1
PAX2
PAX3
PAX4
PAX5
PAX6
PAX7
PBX1
PBX3
PCA3
PCBP3
PCDH1
PCDH8
PCDHA1
PCDHA10
PCDHA11
PCDHA12
PCDHA13
PCDHA2
PCDHA3
PCDHA4
PCDHA5
PCDHA6
PCDHA7
PCDHA8
PCDHA9
PCLO
PCSK1
PCSK5
PCSK9
PDE11A
PDE1B
PDE1C
PDE2A
PDE3A
PDE4D
PDE4DIP
PDE7A
PDE8B
PDGFA
PDGFRA
PDLIM5
PDZD2
PDZD4
PDZRN4
PELI2
PEX5L
PGBD5
PGM1
PGM5
PGR
PGR-AS1
PHACTR1
PHF20L1
PHF21B
PHTF2
PHYHIPL
PIANP
PIK3CA
PIK3CD
PIK3CD-AS1
PIK3R1
PIP5K1B
PKHD1L1
PKIA
PKIB
PKNOX2
PKNOX2-AS1
PKP4
PLA2G7
PLAC9
PLAGL1
PLCE1
PLCH2
PLCXD3
PLEKHA8
PLUT
PLXNA2
PLXNA4
PLXNC1
PLXND1
PNPLA5
POC1B
POU3F2
POU4F1
POU4F3
POU6F2
PP7080
PPARGC1A
PPFIA1
PPM1E
PPM1L
PPP1R13L
PPP1R9A
PPP2R2B
PPP2R2C
PPP3R1
PPP4R1L
PRDM1
PRDM12
PRDM13
PRDM6
PREP
PRIMA1
PRKAA1
PRKAB2
PRKCA
PRKCH
PRKCQ
PRKD1
PRKG1
PRKG1-AS1
PRKG2
PRLR
PROC
PROK2
PROKR2
PROM1
PROX1
PROX1-AS1
PRR16
PRR18
PRR35
PRR5L
PRRG4
PRRX1
PRSS23
PRUNE2
PSD
PSD2
PSMA1
PTCHD1
PTCHD4
PTCSC3
PTENP1
PTENP1-AS
PTGER3
PTGER4
PTH1R
PTH2
PTHLH
PTK2
PTPDC1
PTPN21
PTPN5
PTPRB
PTPRM
PTPRN2
PTPRR
PTPRU
PTPRZ1
PUS3
PVALB
PYGL
PYGM
QPCT
RAB27A
RAB37
RAB3C
RABGAP1L
RAD21
RAD21L1
RAD51B
RAD51L3-RFFL
RAG2
RAI14
RAI2
RALY
RANBP17
RAP1GAP
RARB
RASA2
RASAL3
RASGEF1B
RASGRF1
RASGRF2
RASGRF2-AS1
RASGRP2
RAX
RBBP8
RBFOX3
RBKS
RBMS1
RBP4
RCSD1
RDH8
RECK
REEP1
REEP5
REL
RELN
REV3L
RFLNA
RFTN1
RFX4
RFX6
RGL1
RGMA
RGS17
RGS6
RGS7BP
RHBDL3
RHOBTB1
RIC3
RICTOR
RIMS1
RIMS2
RIPK4
RIPOR2
RNF111
RNF128
RNF130
RNF165
RNF169
RNF219-AS1
RNF39
RNF43
RNF8
RNLS
RNU5F-1
ROBO3
ROR1
RORA
RORA-AS1
RORB
RPAP3
RPF1
RPH3A
RPSAP52
RSF1
RSPO1
RSPO3
RTN1
RTN4RL1
RTN4RL2
RUNX1
RUNX1T1
RUNX2
RUSC2
RXFP3
RXRB
RYR1
RYR3
S100A10
S1PR1
SAMD11
SAMD12
SAMD12-AS1
SAMD3
SAMD4A
SAMMSON
SART3
SATB1
SATB1-AS1
SCAF4
SCARF2
SCG3
SCGB3A1
SCHIP1
SCNN1B
SCNN1G
SCRT1
SCRT2
SCTR
SCUBE1
SDK1
SDK2
SDR16C5
SELENOV
SEMA5A
SEMA5B
SEMA6A
SEMA6C
SERTM1
SESTD1
SETD7
SEZ6L
SFRP5
SFTA3
SGCZ
SGIP1
SGK3
SGMS1
SGPL1
SH2D3C
SH3RF2
SH3TC2
SHC3
SHC4
SHE
SHH
SHISA7
SHISA8
SHTN1
SIDT1
SIGIRR
SIL1
SIM2
SIPA1L1
SKAP2
SKOR1
SKOR2
SKP2
SLAMF6
SLC10A7
SLC12A5
SLC15A1
SLC16A12
SLC16A8
SLC18A1
SLC1A2
SLC1A3
SLC24A2
SLC25A21
SLC25A26
SLC25A48
SLC25A53
SLC26A1
SLC26A3
SLC26A4
SLC26A4-AS1
SLC26A5
SLC2A12
SLC2A13
SLC30A2
SLC30A3
SLC30A8
SLC32A1
SLC35D3
SLC35F1
SLC35F3
SLC35F4
SLC35G1
SLC38A1
SLC39A11
SLC39A8
SLC40A1
SLC44A1
SLC44A5
SLC45A2
SLC4A8
SLC6A1
SLC6A20
SLC6A4
SLC7A10
SLC7A14
SLC7A2
SLC7A8
SLC8A1
SLC8A1-AS1
SLC8A2
SLC8A3
SLC9A3
SLC9A3-AS1
SLC9A9
SLFN11
SLFN12L
SLK
SLX4IP
SMARCE1
SMC6
SMIM13
SMOC1
SMTNL2
SMYD3
SNAP91
SNCAIP
SND1
SNORA89
SNORA99
SNTB1
SORBS1
SOWAHB
SOX14
SOX18
SOX2
SOX2-OT
SOX21
SOX21-AS1
SOX3
SOX5
SOX7
SOX8
SOX9-AS1
SP4
SP8
SPATA16
SPATA18
SPEF2
SPIRE1
SPNS2
SPOCK1
SPOCK2
SPON1
SPRR2D
SPRR2G
SPTLC3
SRCIN1
SRD5A2
SRGAP2-AS1
SRP68
SSBP2
SSH2
SSTR2
ST14
ST3GAL1
ST6GALNAC3
ST6GALNAC5
ST7
STARD4-AS1
STAT4
STAU2
STEAP2-AS1
STK3
STK33
STK39
STMN2
STMN3
STMND1
STRBP
STRIP2
STRN
STUM
STX3
STXBP4
STXBP5L
SUGCT
SULF2
SULT4A1
SV2B
SV2C
SVEP1
SWT1
SYK
SYNDIG1L
SYNE1
SYNE2
SYNJ1
SYPL2
SYT1
SYT14
SYT2
SYT6
SYTL2
TAF2
TAF4B
TAOK3
TAPT1-AS1
TARS
TBC1D1
TBC1D12
TBC1D31
TBCEL
TBL1XR1
TBX1
TC2N
TCF4
TCHH
TCHHL1
TCTE1
TDH
TDP1
TDRD10
TDRD7
TEKT3
TENM2
TESC-AS1
TEX14
TFDP2
TGS1
THADA
THBS4
THPO
THRB
THRB-AS1
THSD4
THUMPD2
TIMM23B
TINCR
TIPARP
TJP1
TLE4
TLN2
TLR2
TLX1
TLX1NB
TLX2
TLX3
TM6SF1
TMC1
TMC3-AS1
TMEFF1
TMEM123
TMEM151B
TMEM170B
TMEM178A
TMEM178B
TMEM179
TMEM181
TMEM2
TMEM200A
TMEM229A
TMEM232
TMEM233
TMEM255A
TMEM59L
TMEM74B
TMOD1
TMOD2
TMPRSS2
TMPRSS4-AS1
TMTC2
TNFAIP8L3
TNFRSF11B
TNFRSF19
TNFSF15
TNFSF8
TNIK
TNPO3
TNR
TNXB
TOPORS
TOX3
TP73
TPBGL
TPD52
TPGS2
TPH2
TPK1
TPM3
TPP2
TRAPPC9
TRH
TRHDE-AS1
TRIB2
TRIM24
TRIM31
TRIM31-AS1
TRIM36
TRIM67
TRIM71
TRIM9
TRIO
TRMT5
TRPC4
TRPM3
TRPM6
TRPS1
TSC22D2
TSHZ1
TSHZ2
TSLP
TSNAX-DISC1
TSPEAR
TSPOAP1
TSPOAP1-AS1
TTBK2
TTC23L
TTC6
TTC9B
TTLL11
TTLL5
TTLL9
TTN
TUBA8
TUBB2B
TXNDC16
UACA
UCHL5
UGT3A1
ULBP2
ULK4
UNC13A
UNC13B
UNC5A
UNCX
URAD
USH2A
USP25
USP30
VAV3
VAX1
VCAN
VENTX
VEPH1
VGLL2
VIT
VPS13B
VPS13D
VRK1
VRK2
VSNL1
VSX1
VWA2
VWA5B2
WDR19
WDR20
WDR35
WDR36
WDR41
WDR70
WDR86
WDR86-AS1
WFDC1
WNT1
WNT11
WNT16
WNT3A
WNT5A
WNT6
WNT7A
WNT8B
WNT9B
WRAP73
WSCD2
WTH3DI
WTIP
XKR4
XKR6
XKR7
YAP1
YPEL4
ZACN
ZADH2
ZBTB1
ZBTB10
ZBTB16
ZBTB41
ZBTB7C
ZCCHC18
ZCCHC7
ZDHHC17
ZEB2
ZEB2-AS1
ZFHX4
ZFHX4-AS1
ZFPM2
ZFPM2-AS1
ZFR
ZIC5
ZKSCAN8
ZMYND11
ZNF175
ZNF277
ZNF365
ZNF423
ZNF469
[truncated: 12 more rows]

## Sheet: MTF2 targets (shPHF19)
List of 2811 genes marked by MTF2 ChIPseq iafter PHF19 KD (shPHF19)
A1CF
AAMDC
AARD
AARS2
AATK
AATK-AS1
ABCA1
ABCA13
ABCB1
ABCG1
ABHD12B
ABHD16B
ABLIM1
ABLIM2
ABLIM3
ABO
ABR
ACADL
ACAN
ACE
ACHE
ACKR3
ACOXL
ACSS1
ACSS2
ACVR1C
ACYP2
ADAM12
ADAM33
ADAMTS10
ADAMTS12
ADAMTS14
ADAMTS16
ADAMTS19
ADAMTS19-AS1
ADAMTS2
ADAMTS3
ADAMTS6
ADAMTS7
ADAMTS8
ADAMTS9
ADAMTS9-AS2
ADAMTSL3
ADAP1
ADARB2
ADCY5
ADCY8
ADCY9
ADCYAP1
ADCYAP1R1
ADGRA1
ADGRA1-AS1
ADGRA2
ADGRA3
ADGRB1
ADGRE1
ADGRE2
ADGRE3
ADGRL1
ADGRL2
ADGRV1
ADRA1A
ADRA1B
ADRA1D
ADRA2A
ADRA2C
AFF3
AGAP2
AGBL3
AGO3
AGXT2
AHCYL2
AHRR
AIF1L
AIM1
AK5
AKAP6
ALK
ALKAL1
ALKAL2
ALMS1
ALOX12P2
ALOX15
ALOX5
ALX1
ALX3
ALX4
AMACR
AMDHD1
AMER2
AMER3
AMH
AMN
AMPH
AMZ1
ANGPT1
ANK1
ANK3
ANKAR
ANKFN1
ANKRD12
ANKRD19P
ANKRD34B
ANKRD34C
ANKRD34C-AS1
ANKRD60
ANKRD63
ANKS1A
ANKS1B
ANO1
ANO1-AS2
ANO2
ANO4
ANO6
ANO9
ANOS1
ANP32B
AOAH
AP1M2
AP2B1
AP3S1
APBA1
APBB1IP
APC2
APCDD1
APP
ARAP2
ARC
ARFGEF3
ARG2
ARHGAP19-SLIT1
ARHGAP20
ARHGAP26
ARHGAP44
ARHGAP5
ARHGAP9
ARHGDIG
ARHGEF12
ARHGEF18
ARHGEF26
ARHGEF26-AS1
ARHGEF28
ARHGEF4
ARHGEF40
ARHGEF6
ARHGEF7
ARHGEF7-AS2
ARID3C
ARID5B
ARL15
ARMC4P1
ARNT2
ARRDC4
ARSB
ARX
ASAP1
ASCC3
ASCL2
ASCL4
ASIC3
ASIC4
ASTN2
ASXL2
ATAD2
ATCAY
ATE1
ATF3
ATG10
ATL1
ATOH8
ATP13A4
ATP1A3
ATP2B2
ATP2C2
ATP6V0A2
ATP6V1C2
ATP8A1
ATP8A2
AUTS2
AVP
AVPR1A
AVPR1B
AXDND1
AXIN2
B3GALT1
B3GAT2
B3GNT4
B3GNT7
B4GALNT2
B4GALNT4
B4GALT6
BAALC
BAALC-AS2
BACE2
BACH2
BAIAP3
BAMBI
BARHL1
BARX1
BARX1-AS1
BARX2
BCAR3
BCAS3
BCL11A
BCL11B
BCL2
BCL9
BEAN1
BEGAIN
BEND6
BEX5
BHLHE23
BHLHE41
BICC1
BICDL2
BLACAT1
BLVRB
BMI1
BMP2
BMP3
BMP4
BMP6
BMP7
BMPER
BMPR1B
BMPR1B-AS1
BMS1P21
BNC1
BNC2
BPIFA4P
BRE
BRINP1
BRSK2
BRWD1
BSPRY
BSX
BTBD9
BTNL9
BUB3
C10orf11
C10orf76
C11orf40
C11orf74
C11orf96
C12orf42
C12orf56
C14orf37
C15orf38-AP3S2
C15orf59
C17orf58
C19orf25
C19orf73
C1QL2
C1QL3
C1QTNF12
C1QTNF2
C1QTNF3-AMACR
C1QTNF4
C1QTNF8
C1orf112
C1orf194
C1orf61
C1orf87
C20orf166-AS1
C21orf91
C2CD3
C2CD4A
C2CD4B
C2CD4C
C2orf70
C2orf72
C3orf70
C3orf80
C4orf19
C4orf22
C5orf51
C5orf58
C6
C7
C8orf37-AS1
C9
C9orf135
C9orf41-AS1
C9orf66
CA4
CA7
CA8
CABP1
CABP7
CACHD1
CACNA1A
CACNA1B
CACNA1C
CACNA1C-AS1
CACNA1D
CACNA1E
CACNA1G
CACNA1G-AS1
CACNA1H
CACNA2D1
CACNA2D2
CACNA2D3
CACNA2D4
CACNB2
CACNB4
CACNG2
CACNG4
CACNG7
CACNG8
CADM1
CADM3
CADM4
CADPS
CADPS2
CALB1
CALCR
CALY
CAMK1D
CAMK2B
CAMK2N1
CAMK2N2
CAMK4
CAMKV
CAMSAP3
CAMTA1
CAPN14
CAPSL
CARD6
CARMIL2
CARNMT1
CARTPT
CASC1
CASC15
CASC17
CASC21
CASC23
CASC8
CASKIN1
CASR
CATSPERZ
CAV1
CBFA2T2
CBFA2T3
CBX4
CBX8
CCDC140
CCDC148
CCDC149
CCDC152
CCDC169-SOHLH2
CCDC177
CCDC178
CCDC183
CCDC185
CCDC192
CCDC26
CCDC39
CCDC61
CCDC83
CCDC85A
CCEPR
CCK
CCKBR
CCNA1
CCND2
CCND2-AS1
CD109
CD1D
CD40
CD5L
CD8A
CDC20B
CDC42BPA
CDC42BPB
CDC42EP5
CDH1
CDH18
CDH20
CDH22
CDH23
CDH4
CDH6
CDHR1
CDK14
CDK19
CDK4
CDK5R2
CDK6
CDKAL1
CDKN1C
CDKN2B-AS1
CDON
CDX2
CDYL2
CEACAM21
CEACAM4
CEACAM7
CEBPA
CEBPA-AS1
CECR2
CECR6
CELF2
CELF4
CELF5
CELSR1
CEMIP
CEP112
CEP41
CFAP43
CFAP46
CFAP54
CFAP65
CFAP70
CFAP73
CFAP74
CFAP77
CFDP1
CGNL1
CHAT
CHD1L
CHD5
CHD6
CHD7
CHGA
CHGB
CHL1
CHL1-AS2
CHP2
CHRD
CHRDL2
CHRM1
CHRM4
CHRNA3
CHRNA4
CHRNA7
CHRNB2
CHRND
CHST1
CHST8
CHST9
CHSY3
CIITA
CILP2
CISTR
CITED1
CKLF
CKLF-CMTM1
CLC
CLDN10
CLDN5
CLDN7
CLEC2L
CLIC5
CLIC6
CLMP
CLSTN2
CLVS1
CLYBL
CMPK2
CMSS1
CNIH3
CNNM1
CNNM2
CNPY1
CNR1
CNTD2
CNTFR
CNTN1
CNTN2
CNTNAP2
COCH
COL11A2
COL14A1
COL15A1
COL19A1
COL21A1
COL24A1
COL25A1
COL27A1
COL28A1
COL2A1
COL4A1
COL4A2
COL5A3
COL6A3
COL8A1
COL8A2
COL9A2
COL9A3
COLEC10
COLEC12
COLGALT2
COMMD3-BMI1
COMP
CORIN
CPA6
CPAMD8
CPEB1
CPEB2
CPED1
CPLX1
CPLX2
CPNE4
CPNE9
CPVL
CPXM2
CPZ
CR2
CRABP1
CRADD
CREB5
CREG2
CRHBP
CRHR1
CRHR2
CRIM1
CRLF1
CRMP1
CRNDE
CRTAC1
CRYBA2
CSMD2
CTD-2194D22.4
CTD-2297D10.2
CTNNA1
CTNNAL1
CTNNB1
CTNND2
CTTNBP2
CTXN2
CUX2
CWH43
CXCL14
CXCR4
CXXC4
CXXC4-AS1
CXXC5
CYB5R2
CYP19A1
CYP1B1-AS1
CYP24A1
CYP26A1
CYP26B1
CYP26C1
CYP27B1
CYP2E1
CYP4F22
CYP4X1
DAAM1
DAB1
DAB2
DACT1
DACT3
DACT3-AS1
DAPK1
DBH
DBH-AS1
DBX1
DBX2
DCAF5
DCDC1
DCDC2
DCLK1
DDAH1
DDX25
DEC1
DEFB126
DEGS2
DENND1A
DENND2A
DEPDC1B
DGKG
DGKI
DGKK
DGKZ
DHH
DIGIT
DIO2-AS1
DIO3
DIRAS1
DIRAS3
DISC1
DISP3
DIXDC1
DKFZP434H168
DKFZp686K1684
DLG2
DLG3
DLGAP1
DLGAP3
DLGAP4
DLK2
DLL1
DLX1
DLX3
DLX5
DLX6-AS1
DMBT1P1
DMRT3
DMRTA2
DNAH10
DNAH11
DNAH14
DNAH5
DNAH8
DNAJC22
DNASE1L2
DNER
DNM3
DNMBP
DNMBP-AS1
DOC2A
DOC2B
DOCK1
DOCK10
DOCK4
DOCK8
DOK7
DPF1
DPF3
DPH6-AS1
DPP4
DPY19L2P4
DPYSL3
DPYSL4
DPYSL5
DRAXIN
DRD2
DRGX
DROSHA
DSCAML1
DSCR8
DSG1-AS1
DSG2
DSP
DST
DTNA
DTNB
DTNBP1
DTX1
DTX4
DUBR
DUOX1
DUOX2
DUOXA1
DUOXA2
DUSP10
DUSP15
DUSP2
DUSP26
DUSP4
DUSP8
DUSP9
DYNC1I1
EBF1
EBF2
EBF3
EBF4
ECE2
ECEL1
ECEL1P2
EDARADD
EDIL3
EDN3
EDNRA
EFCAB11
EFCAB13
EFEMP1
EFHD1
EFNA3
EFNA5
EFNB1
EFNB2
EFNB3
EFS
EGFEM1P
EGFL6
EGFLAM
EGFLAM-AS4
EGLN1
EGLN3
EGR2
EGR3
EGR4
EIF4E1B
ELFN1
ELL2
ELMO1
ELOVL7
ELP5
EMILIN2
EMILIN3
EML1
EML6
EMX1
EMX2
EMX2OS
EN2
ENDOV
ENSA
ENTPD1-AS1
ENTPD7
EPB41L4A
EPB41L4A-AS2
EPHA1-AS1
EPHA8
EPHB1
EPHB3
EPHB6
EPHX3
EPOP
EPPIN-WFDC6
ERBB4
ERBIN
ERCC6
ERFE
ERG
ESM1
ESPN
ESPNP
ESR1
ESRP1
ESRRB
ESRRG
ESX1
ESYT3
ETS1
EVA1A
EVL
EVX1
EVX1-AS
EXOC3L2
EXOC3L4
EXOC6B
EXOC7
EXT1
EYA1
EYA2
EYA4
EZH2
F13A1
FADS6
FAM107B
FAM110C
FAM120B
FAM129A
FAM131B
FAM13C
FAM149A
FAM155B
FAM159A
FAM159B
FAM162B
FAM163A
FAM168A
FAM169A
FAM169B
FAM172A
FAM174B
FAM181B
FAM184B
FAM189A1
FAM196A
FAM198A
FAM19A4
FAM205C
FAM20A
FAM20C
FAM3B
FAM47E
FAM47E-STBD1
FAM49B
FAM69C
FAM71D
FAM78A
FAM83F
FARS2
FBN1
FBN2
FBN3
FBP1
FBRSL1
FBXL13
FBXL16
FBXW8
FCHSD2
FCRL3
FCRL4
FDXR
FENDRR
FER
FER1L6
FER1L6-AS2
FEV
FEZF1
FEZF1-AS1
FEZF2
FGF12
FGF12-AS3
FGF14
FGF14-IT1
FGF18
FGF19
FGF20
FGF3
FGF5
FGF8
FGF9
FGFR2
FGFR3
FGFRL1
FGR
FHOD3
FIBCD1
FIG4
FIGLA
FKBP5
FKTN
FLI1
FLJ16779
FLJ22447
FLJ32255
FLJ41278
FLRT2
FLT1
FLT3
FLT4
FMO5
FMOD
FN1
FNDC1
FNDC10
FNDC3B
FNDC5
FOXA2
FOXA3
FOXB1
FOXB2
FOXC1
FOXCUT
FOXE3
FOXF1
FOXF2
FOXG1-AS1
FOXH1
FOXI2
FOXI3
FOXJ1
FOXL2
FOXL2NB
FOXN2
FOXN4
FOXO6
FOXP1
FOXP2
FOXQ1
FRAS1
FRAT1
FREM2
FRMD3
FRMD4A
FRMD4B
FRMD6
FRMD6-AS2
FRMPD1
FSCN2
FST
FSTL1
FSTL3
FSTL4
FUT2
FUT8
FXYD6
FXYD6-FXYD2
FZD8
GAB1
GABBR2
GABRD
GADD45G
GADL1
GALNT14
GALNT16
GALNT3
GALNT6
GALNT9
GALR2
GALR3
GAP43
GAREM1
GAS1
GAS1RR
GAS2L1
GATA3
GATA3-AS1
GATA4
GATA5
GATA6
GATA6-AS1
GBA3
GBX1
GBX2
GCGR
GDA
GDAP1L1
GDF6
GDF7
GDNF
GDNF-AS1
GFI1
GFOD1
GFRA1
GFRA2
GFY
GGTA1P
GHR
GJA1
GJB2
GJB6
GJD2
GJD4
GLB1L3
GLCE
GLDN
GLI3
GLI4
GLP1R
GLS2
GMDS
GMNC
GNA14
GNAL
GNAO1
GNAQ
GNAS
GNG12
GNG12-AS1
GNG13
GNG2
GOLGA7B
GOSR2
GP1BB
GPC5
GPHN
GPM6B
GPR101
GPR12
GPR153
GPR158
GPR158-AS1
GPR4
GPX7
GRASP
GRB10
GREB1L
GREM2
GRHL2
GRIA2
GRID1
GRID2
GRIK1
GRIK1-AS1
GRIK2
GRIK3
GRIK4
GRIK5
GRIN1
GRIN2B
GRIN2C
GRIN2D
GRIN3A
GRIN3B
GRIP1
GRM1
GRM4
GRM5
GRM8
GRP
GRTP1
GS1-24F4.2
GSC
GSC2
GSDMC
GSG1L
GSPT2
GSX1
GSX2
GTDC1
GUCY1A2
GUCY1A3
GXYLT2
HAND1
HAP1
HAPLN1
HAPLN2
HAR1A
HAR1B
HAS2
HAS2-AS1
HBA1
HBA2
HBM
HBQ1
HCG17
HCK
HCN2
HCN4
HDAC9
HECTD2-AS1
HECW1
HECW2
HELT
HES2
HES3
HES5
HEY1
HEY2
HGF
HHIP
HHLA1
HIC1
HIPK2
HIST1H3I
HIST1H4L
HLA-DPA1
HLA-DQB1
HMCN1
HMCN2
HMGA2
HMX1
HMX2
HMX3
HNF4G
HNRNPUL2
HNRNPUL2-BSCL2
HOMER1
HOTAIR
HOXA11
HOXA11-AS
HOXB7
HOXB8
HOXC11
HOXD-AS2
HOXD10
HOXD11
HOXD13
HPCA
HPGD
HPSE2
HR
HRAT92
HRH2
HRH3
HRK
HS3ST2
HS3ST3B1
HS3ST6
HS6ST3
HSD11B2
HSPA12B
HTR1B
HTR1F
HTR4
HTR5A
HTR5A-AS1
HTR6
HTR7
HTRA1
HTRA3
HUNK
HYDIN
HYMAI
ICE1
ICK
ICOSLG
ID4
IDUA
IGDCC3
IGF1R
IGF2
IGF2-AS
IGF2BP1
IGF2BP3
IGFBP1
IGFBP2
IGFBP3
IGFBP5
IGFBP7
IGFBP7-AS1
IGFL1
IGFL4
IGLON5
IGSF11
IGSF21
IHH
IKZF1
IKZF3
IL12A-AS1
IL13
IL15
IL17A
IL17D
IL17RD
IL17REL
IL1RAP
IL20RA
IL7
IL7R
ILDR2
IMMP2L
INA
INHBA
INHBA-AS1
INHBB
INPP4B
INS-IGF2
INSM1
INSM2
INSRR
INTS4P2
IQCJ
IQCJ-SCHIP1
IQGAP2
IQSEC2
IQSEC3
IQUB
IRAIN
IRF4
IRF8
IRX3
IRX4
IRX5
ISL1
ISL2
ISLR2
ISM1
ISM2
ISPD
ITGA11
ITGA2
ITGA8
ITGA9
ITGB8
ITIH5
ITSN1
JAK1
JAKMIP1
JAKMIP2
JAKMIP3
JAM2
JAM3
JAZF1
JPH1
JPH3
JSRP1
KAAG1
KALRN
KANK3
KANK4
KAT6B
KAT7
KCNA2
KCNA3
KCNA7
KCNAB1
KCNB1
KCNB2
KCNC1
KCNC3
KCND2
KCND3
KCNF1
KCNH1
KCNH3
KCNIP1
KCNJ16
KCNJ2
KCNJ2-AS1
KCNJ4
KCNJ5
KCNJ6
KCNK1
KCNK10
KCNK12
KCNK13
KCNK16
KCNK17
KCNK2
KCNK3
KCNK4
KCNK4-TEX40
KCNK6
KCNK9
KCNMA1
KCNMB4
KCNN1
KCNQ1
KCNQ1-AS1
KCNQ2
KCNQ3
KCNQ4
KCNS2
KCNT1
KCTD1
KCTD16
KDELR1
KIAA0232
KIAA0825
KIAA1024
KIAA1217
KIAA1324
KIAA1324L
KIAA1328
KIAA1614
KIF19
KIF1A
KIF24
KIF26A
KIF26B
KIF6
KIFC2
KISS1R
KIT
KL
KLF15
KLF3-AS1
KLF7
KLF8
KLHDC8A
KLHL14
KLHL29
KLHL35
KLK10
KLK4
KLRG2
KNDC1
KRT77
KRT8P41
KRTAP5-AS1
KSR2
KTN1
L1CAM
L3MBTL4
LACTBL1
LAD1
LAMA2
LAMA3
LAMB1
LAMC1
LAMC2
LBH
LBX1
LBX1-AS1
LCA10
LCE1A
LCE1B
LCE2A
LCE6A
LCP2
LDLRAD4
LEF1
LEF1-AS1
LEKR1
LELP1
LGALS13
LGI2
LGI3
LGR4
LGR5
LGR6
LHFPL3
LHFPL3-AS1
LHX3
LHX4
LHX5
LHX5-AS1
LHX6
LHX8
LHX9
LIFR
LIFR-AS1
LIMS1
LIMS2
LIN28A
LINC00092
LINC00189
LINC00210
LINC00261
LINC00326
LINC00359
LINC00437
LINC00457
LINC00474
LINC00504
LINC00517
LINC00534
LINC00535
LINC00554
LINC00599
LINC00624
LINC00632
LINC00682
LINC00693
LINC00824
LINC00842
LINC00858
LINC00866
LINC00886
LINC00927
LINC00964
LINC00970
LINC00982
LINC01020
LINC01056
LINC01081
LINC01082
LINC01096
LINC01116
LINC01117
LINC01122
LINC01133
LINC01135
LINC01141
LINC01143
LINC01151
LINC01158
LINC01159
LINC01162
LINC01166
LINC01167
LINC01168
LINC01181
LINC01210
LINC01237
LINC01276
LINC01305
LINC01311
LINC01314
LINC01315
LINC01342
LINC01387
LINC01389
LINC01391
LINC01397
LINC01412
LINC01456
LINC01475
LINC01483
LINC01498
LINC01500
LINC01507
LINC01574
LINC01586
LINC01607
LINC01611
LINC01619
LINC01664
LINC01749
LINC01750
LINC01798
LINC01873
LINC01918
LINC01973
LINC02011
LINC02015
LINC02036
LINC02052
LINC02097
LINC02119
LINC02121
LINC02135
LINC02150
LINC02198
LINC02202
LINC02210-CRHR1
LINGO1
LINGO3
LIPG
LKAAEAR1
LMBRD2
LMF1
LMNTD2
LMO1
LMO2
LMO7
LMX1A
LMX1B
LNPEP
LOC100126784
LOC100128317
LOC100128770
LOC100129083
LOC100129434
LOC100129697
LOC100130587
LOC100287944
LOC100288748
LOC100288798
LOC100294362
LOC100505530
LOC100505585
LOC100506023
LOC100506071
LOC100506368
LOC100506639
LOC100506885
LOC100507065
LOC100996635
LOC100996724
LOC101926898
LOC101926905
LOC101926915
LOC101926942
LOC101927043
LOC101927066
LOC101927179
LOC101927248
LOC101927437
LOC101927497
LOC101927583
LOC101927780
LOC101927793
LOC101927811
LOC101927845
LOC101927870
LOC101928009
LOC101928075
LOC101928107
LOC101928134
LOC101928174
LOC101928177
LOC101928370
LOC101928416
LOC101928438
LOC101928583
LOC101928775
LOC101928782
LOC101928882
LOC101929076
LOC101929095
LOC101929122
LOC101929297
LOC101929524
LOC101929538
LOC101929555
LOC101929595
LOC101929709
LOC101929710
LOC101929748
LOC102723313
LOC102723373
LOC102724050
LOC102724593
LOC102724604
LOC105369146
LOC105369423
LOC105369438
LOC105369473
LOC105369971
LOC105370802
LOC105372440
LOC105373021
LOC105374428
LOC105375218
LOC105375304
LOC105375734
LOC105375800
LOC105377716
LOC105377879
LOC105377975
LOC105378269
LOC105378367
LOC105616981
LOC145845
LOC149373
LOC149950
LOC158435
LOC255187
LOC283028
LOC283045
LOC283299
LOC283731
LOC283856
LOC285484
LOC285696
LOC339166
LOC339529
LOC389332
LOC400706
LOC439933
LOC440461
LOC440934
LOC441242
LOC442028
LOC642366
LOC643339
LOC643802
LOC646548
LOC727993
LOC728730
LOC728739
LOC729296
LOC729652
LOC729870
LONP2
LOR
LOX
LOXHD1
LPAR3
LPL
LPO
LPP
LRMP
LRP1B
LRP2
LRP3
LRP4
LRRC10B
LRRC18
LRRC26
LRRC32
LRRC4
LRRC43
LRRC4B
LRRC56
LRRC7
LRRK2
LRRN2
LRRN4
LRTM2
LSP1
LTBP1
LTK
LY86-AS1
LYL1
LYPD1
LYPD6B
LZTS3
MACF1
MACROD1
MAD2L2
MADCAM1
MAEL
MAFA
MAGI2
MAL
MAL2
MAMDC2
MAML2
MAML3
MAN1A1
MAN1C1
MAN2A1
MAP2K6
MAP2K7
MAP3K5
MAP3K7CL
MAP3K9
MAP4K3
MAP4K5
MAP6
MAP7
MAPK11
MAPK4
MAPK8IP2
MARCH6
MARCH8
MARCH9
MARCKS
MARK1
MARVELD3
MAST1
MAST4
MATK
MB21D2
MBNL1
MBNL2
MBNL3
MC5R
MCC
MCF2
MCF2L
MCF2L-AS1
MCOLN2
MCTP1
MDGA2
MDK
MDN1
ME3
MECOM
MED12L
MED13L
MEF2C
MEF2C-AS1
MEG8
MEGF11
MEIS1-AS3
MEIS2
MEIS3
MEMO1
MET
METAP1D
METRNL
METTL24
MEX3D
MFSD4A
MGAT4C
MGC12916
MIB1
MIR1-1
MIR1-1HG
MIR100HG
MIR106A
MIR1179
MIR1234
MIR124-1
MIR124-3
MIR1247
MIR1268A
MIR1273E
MIR129-2
MIR1299
MIR132
MIR137
MIR137HG
MIR155HG
MIR18B
MIR19B2
MIR200A
MIR200B
MIR203A
MIR203B
MIR20B
MIR212
MIR217HG
MIR2682
MIR3131
MIR3197
MIR3621
MIR363
MIR3663
MIR3663HG
MIR3665
MIR378B
MIR378I
MIR4281
MIR4321
MIR4488
MIR4497
MIR4526
MIR4634
MIR4674
MIR4683
MIR4734
MIR4783
MIR4792
MIR483
MIR548G
MIR548N
MIR548T
MIR5680
MIR5691
MIR670
MIR6720
MIR6841
MIR7-2
MIR769
MIR7845
MIR9-3
MIR9-3HG
MIR92A2
MIR92B
MIR99AHG
MIS18BP1
MITF
MIXL1
MKLN1
MKX
MKX-AS1
MLH3
MLLT6
MLN
MLPH
MLXIPL
MMP16
MMP24
MMP25
MMP28
MMP9
MNAT1
MNX1
MNX1-AS1
MOB3B
MORC2-AS1
MOS
MPP2
MPPED1
MRAP2
MRGPRE
MRGPRG
MRGPRG-AS1
MROH2B
MRPS6
MRVI1-AS1
MS4A15
MS4A3
MS4A6A
MSI1
MSRA
MSRB3
MSX1
MSX2
MSX2P1
MT3
MTUS1
MTUS2
MUC1
MUC17
MUC5AC
MYB
MYCN
MYCNOS
MYH11
MYO16
MYO18B
MYO5B
MYOCD
MYOD1
MYOF
MYOM1
MYT1
MZF1
MZF1-AS1
N4BP2L1
NAALADL2
NADK2
NALCN
NALT1
NANOS3
NAP1L2
NAT16
NATD1
NAV2
NAV3
NBPF20
NBPF25P
NBPF9
NCALD
NCAN
NCOA2
NDNF
NDRG2
NDRG4
NDST3
NDUFA4L2
NEBL
NEBL-AS1
NEFL
NEIL1
NEK7
NELL2
NEO1
NEURL1
NEURL1-AS1
NEUROD1
NEUROD2
NEUROD4
NEUROD6
NEUROG1
NEUROG2
NEUROG3
NFASC
NFATC1
NFATC2
NFIX
NFKBIE
NGEF
NGFR
NHLH2
NHSL2
NIM1K
NIN
NKAIN1
NKAIN2
NKAIN3
NKAIN4
NKD1
NKD2
NKPD1
NKX1-2
NKX2-2
NKX2-3
NKX2-5
NKX3-2
NKX6-2
NLGN1
NLRP11
NMNAT2
NMNAT3
NMRK1
NMUR1
NNMT
NNT
NOG
NOL4
NOL4L
NOS1
NOS1AP
NOTCH1
NOTO
NOTUM
NOV
NOVA2
NPAS1
NPAS2
NPAS3
NPFFR1
NPFFR2
NPHS1
NPHS2
NPNT
NPPB
NPR1
NPR3
NPSR1
NPSR1-AS1
NPTX1
NPTX2
NPTXR
NPW
NR0B1
NR2E1
NR2F1
NR2F1-AS1
NR3C1
NR3C2
NR5A1
NR5A2
NR6A1
NRCAM
NREP
NREP-AS1
NRG1
NRG2
NRIP1
NRN1
NRP2
NRXN2
NRXN3
NSD1
NSG1
NSMAF
NT5C1A
NT5C2
NTN3
NTN4
NTNG2
NTRK1
NTRK2
NTSR1
NUAK1
NUDT11
NWD2
NXPH2
NXPH4
NYAP1
OAS2
OC90
OCA2
OGFR
OLFM2
OLIG1
OLIG2
OLIG3
ONECUT1
ONECUT2
ONECUT3
OOSP1
OPA1
OPLAH
OPRD1
OPRL1
OR1E1
OR1G1
OR1J2
OR4D1
OR51B5
OR6X1
OR8D2
OR9Q1
ORC5
OSBPL1A
OSBPL3
OSCAR
OSMR-AS1
OSTF1
OSTM1-AS1
OTOP1
OTOP3
OTP
OTUD1
OTUD7A
OTUD7B
OTX2
OTX2-AS1
OVCH2
OVOL1
OVOL1-AS1
OVOL2
OXCT1
OXGR1
OXR1
P2RX2
P3H2
PAG1
PAH
PAK1
PALM2
PALM2-AKAP2
PAM
PAMR1
PANK4
PAPLN
PAPPA
PAQR5
PAQR8
PARM1
PARVA
PAX2
PAX3
PAX4
PAX5
PAX6
PAX7
PAX9
PBX1
PBX3
PCAT19
PCBD2
PCBP1-AS1
PCBP3
PCDH1
PCDH19
PCDH8
PCDHB1
PCLO
PCNX2
PCSK1
PCSK5
PCSK6
PCSK9
PDE11A
PDE1B
PDE1C
PDE2A
PDE3A
PDE4A
PDE4B
PDE4D
PDE4DIP
PDE8B
PDGFA
PDGFRA
PDIA2
PDX1
PDYN
PDZD2
PDZD4
PEAK1
PEBP4
PEG10
PELI2
PER2
PEX5L
PGBD5
PGGHG
PGGT1B
PGM5
PGR
PGR-AS1
PHACTR1
PHACTR3
PHF20L1
PHF21B
PHF24
PHOX2B
PHYHIPL
PIANP
PIEZO2
PIK3CD
PIK3CD-AS1
PIK3R1
PIK3R5
PIP5K1B
PITPNC1
PITX2
PKD2L1
PKDCC
PKIA
PKIB
[truncated: 812 more rows]

[truncated: 1 more sheets: Hoja5]
