# Supplementary material for: PHF19 mediated regulation of proliferation and invasiveness in prostate cancer cells
Source: eLife. 2020 Mar 10;9:e51373. doi: 10.7554/eLife.51373 (PMC7064337; doi:10.7554/eLife.51373)
Supplement: Supplementary file 2. [file elife-51373-supp2.xlsx]

## Sheet: 652 genes up-regulated
List of 652 genes up-regulated after PHF19 KD
ABCB10
ABCG2
ACOX2
ACOXL
ACTN2
ACVR2B
ADAM17
ADAM19
ADAM8
ADCY1
ADM
ADM2
ADORA2B
ADRA1B
AFG3L1P
AGO2
AHR
AK4
AKNAD1
ALDH1A3
AMIGO2
AMOT
AMPD3
ANAPC16
ANGPTL4
ANKEF1
ANKRD33B
ANKRD46
ANTXR2
AOX1
AP1S3
AREG
ARF6
ARHGAP24
ARID3A
ARID3B
ARL14
ARL4C
ARL8A
ARMCX1
ARNTL2
ARPC1B
ASNS
ATAD1
ATF3
ATL1
ATP12A
ATP13A2
ATP2B4
AVEN
AVL9
B3GALNT1
B3GALT5
B3GNT3
BIK
BIRC2
BIRC3
BMF
BMP4
BNIP3
BRCA2
BSPRY
BTG2
BVES
BZW1
C11orf80
C12orf73
C12orf75
C15orf39
C2orf54
C2orf81
C3orf52
C4orf22
C6orf1
C6orf99
C7orf57
C9orf72
CACHD1
CACNA1G
CALD1
CAMSAP3
CASTOR1
CAV2
CBFB
CCDC50
CCDC68
CCL3L1
CCL3L1
CCNB1IP1
CCND1
CCNE1
CCNG1
CCNJ
CD109
CD22
CD55
CDC25A
CDC42EP3
CDC42SE1
CDCP1
CDH1
CDKN1A
CDS1
CEACAM6
CENPK
CENPV
CH25H
CHAC1
CHD1
CHMP4C
CHRNB1
CLDN1
CLDN16
CLDN4
CLDND1
CMC4
CMTM3
CMTM4
CMTM7
CNNM1
CNTNAP1
COL13A1
COMMD2
CORO2B
CPEB1
CPEB2
CPNE7
CREB5
CSF2
CTSS
CXCL1
CXCL16
CXCL5
CXCL8
CXCR4
CYFIP2
CYSTM1
DCK
DCLK2
DDAH1
DDHD2
DDIT4
DDX58
DHRS1
DICER1
DLX1
DNAH14
DNAJC25
DNER
DNTTIP1
DOPEY2
DPM2
DPP7
DRAP1
DSC2
DSP
DTL
DTNA
DUSP10
DUSP4
DUSP5
DUSP6
E2F7
EAF1
EDN2
EGLN3
EIF5A2
ELK3
ELL2
ELOVL7
EMB
EMBP1
ENO2
ENO3
ENTPD6
EPB41L4B
EPB41L5
EPCAM
EPS8
EREG
ERN1
ERO1A
ERRFI1
ESRP1
ESRP2
ETV5
F13A1
FA2H
FAM102A
FAM135A
FAM210A
FAM219B
FAM43A
FAM47E
FAM83B
FAXDC2
FBXO27
FEM1C
FER1L4
FGF11
FGF2
FHL2
FLCN
FMNL2
FNIP1
FOSL1
FOXD1
FOXL1
FOXL2NB
FRMD6
FRMD8
FUT4
G0S2
GAB2
GADD45A
GALNT7
GCC2
GCH1
GCLC
GFPT1
GINM1
GJB2
GJB3
GNG2
GOLGA7B
GPR3
GRAMD3
GRB7
GSN
HACD4
HAS3
HBEGF
HDAC9
HECA
HERPUD2
HEY1
HID1
HMGA1
HMGA2
HMGCS1
HOOK1
HOXB2
HOXB3
HOXB5
HOXB8
HS3ST1
HSD17B12
HSF2BP
HTR1B
IBTK
IFI27L1
IFI44
IFIH1
IFIT2
IFT57
IFT81
IGFBP2
IL18
IL1RL1
IL23A
IL24
IL31RA
IL6R
IL7R
INA
IQCB1
IRAK2
IRF6
ITGA2
ITGB3
ITGB5
ITPR3
ITPRIPL2
JAG1
JDP2
JMJD1C
JRK
KATNAL1
KCNK1
KCNMA1
KCNN4
KDF1
KIAA1683
KIF1A
KIF5C
KIFC2
KLF10
KLF4
KLF7
KLHL5
KLRC2
KLRC3
KRR1
KTN1-AS1
KYNU
L1CAM
LACC1
LAMB3
LAMC2
LAT2
LHX1
LIF
LIMS1
LIMS3
LINC-PINT
LINC00673
LINC00880
LINC01588
LIPG
LOC100506178
LOC100996437
LOC101928820
LOC101929541
LOC102724428
LOC646762
LOX
LPAR1
LRRN4
LTBP1
LURAP1L
MAFG
MAGI1
MAL2
MAMDC2
MAN1A1
MAP1B
MAP2K3
MAP3K9
MAP7
MAPK13
MARC1
MARCKS
MARVELD2
MASTL
MCM8
MCRIP1
MCTP1
MDFI
MERTK
MESDC1
MET
MFGE8
MFSD14C
MFSD2A
MIA2
MICU3
MIER2
MIGA1
MIR100HG
MIR210HG
MKX
MME
MMP1
MMP14
MN1
MOB1A
MOB1B
MOV10
MPZL3
MREG
MROH1
MTAP
MTF2
MTHFD1L
MTRNR2L8
MXD1
MYBPH
MYEOV
MYH15
MYO5B
MYO5C
N4BP3
NABP1
NAV3
NCS1
NDFIP2
NDRG1
NEDD9
NEFL
NEXN
NFKB2
NGEF
NLK
NOV
NPAS2
NPTX1
NR4A2
NT5DC3
NT5E
NTSR1
NUP155
OCLN
ODC1
OFD1
ORAI3
OSBPL8
OSGIN2
OTUD6B
P2RX4
P4HA1
P4HA2
PADI1
PADI2
PADI3
PANX2
PAPD5
PAPPA
PARD6B
PARM1
PDE4B
PDGFB
PDK1
PEG10
PEX26
PFKFB4
PHF7
PHLDA1
PI3
PIM1
PIP4K2C
PISD
PLA2G16
PLA2G4C
PLAGL2
PLAU
PLAUR
PLCD4
PLEKHA1
PLEKHA6
PLEKHN1
PLIN2
PLK3
PMAIP1
PON3
PPARG
PPFIA4
PPP1R3E
PQLC2
PRDM8
PRICKLE1
PRKAA1
PRKCD
PRODH
PRR15
PRSS22
PRTG
PSAT1
PTGER4
PTGS2
PTPDC1
PTPRH
PTPRR
PXDN
QPCT
R3HDM4
RAB11FIP2
RAB27B
RAB38
RAB39A
RAB39B
RAB3IP
RABGAP1
RAD9B
RAP2B
RAPH1
RASA1
RASA2
RASEF
RASGRP3
RASSF10
RASSF2
RBMS1
RBPMS2
REPS2
REXO1
RFK
RGMB
RGS14
RHEBL1
RHOD
RICTOR
RIMKLA
RIT1
RNF128
RNF141
RNF217
ROBO4
ROCK2
RPIA
RPPH1
RPS6KA6
RRAD
RRNAD1
RTCA
RUBCN
SACS
SAMD8
SAV1
SCARF2
SCEL
SCML1
SCML2
SDAD1P1
SDC1
SEC14L2
SEC61G
SEL1L3
SEMA7A
SERPINB5
SERPINB7
SERPINE2
SESN2
SGPP2
SHANK3
SHH
SIGIRR
SKIL
SLAIN1
SLC12A2
SLC20A1
SLC20A2
SLC25A22
SLC35G2
SLC38A1
SLC38A2
SLC38A4
SLC3A2
SLC46A3
SLC4A5
SLC4A7
SLC7A5
SLC9A7
SMC5
SMURF1
SMURF2
SNRPA1
SNX21
SOCS2
SORL1
SOWAHB
SOX4
SOX9
SP6
SPAG1
SPAG4
SPDEF
SPHK1
SPINT1
SPP1
SPRED3
SPRY2
SPRY4
SPRYD3
SPTB
SQLE
SREK1IP1
ST14
ST3GAL6
STAMBPL1
STC1
STC2
STK35
STK39
STK4
STMN3
STRADB
STX3
SUN3
SVIL
SYNGR2
SYNGR3
SYTL2
TBC1D10A
TBC1D4
TCHH
TEP1
TET3
TGFA
TIFA
TIMP2
TIPARP
TMBIM6
TMEM158
TMEM170A
TMEM35B
TMEM45B
TMEM55A
TMEM87B
TMEM8A
TNFAIP3
TNFRSF10A
TNFRSF10B
TNFRSF10D
TNFRSF11A
TNFRSF1B
TNFRSF21
TNNC2
TOMM34
TOR4A
TRAF1
TRIB1
TRIB3
TRIM36
TRIM9
TTC19
TTC9
UACA
UBASH3B
UBE2R2
UBE3C
UBR4
UPK2
UPP1
USP36
USP53
VAMP3
VEGFA
VEGFC
VGLL4
VMO1
WASF2
WDR4
WDR45B
WDR54
WFDC2
WFDC3
WNT5B
WNT7A
XDH
XKR8
ZBTB21
ZC3H10
ZC3HAV1
ZC3HAV1L
ZDHHC18
ZDHHC21
ZDHHC23
ZEB2
ZNF107
ZNF160
ZNF281
ZNF292
ZNF451
ZNF567
ZNF669
ZNF670
ZNF678
ZNF765
ZNF845
ZNF85
ZNF850
ZSCAN12P1

## Sheet: 847 genes down-regulated
List of 847 genes down-regulated after PHF19 KD
AARS
AASS
AATF
ABAT
ABCA1
ABCA10
ABCA13
ABCC1
ABCC6P2
ABHD11-AS1
ABL1
ABLIM2
ACER2
ACOT7
ACSL5
ACTC1
ACTR10
ADAM12
ADAM21
ADAMTS7
ADARB1
ADGRG1
ADGRG2
ADGRG6
ADGRL1
AGBL5
AGFG2
AGPAT3
AHCYL1
AHNAK2
AKAP1
AKR1C1
AKR1C3
ALAD
ALDH5A1
ALDH6A1
ALG14
ALPK1
ALPP
AMFR
AMMECR1
ANKRD1
ANKRD2
ANKRD9
ANO4
ANP32A
ANXA8
ANXA8
ANXA8L1
AP4E1
APCDD1
APOLD1
ARHGDIA
ARHGEF17
ARL14EPL
ARL6IP4
ASS1
ATG12
ATG2B
ATG3
ATP10D
ATP1A3
ATP2A3
ATXN1L
B4GAT1
B9D2
BACE1
BAG1
BAHCC1
BARHL2
BASP1
BBS4
BBS9
BCAM
BCAS3
BCHE
BCL3
BDH2
BEAN1
BFSP1
BICD1
BLVRB
BMPR2
BOD1
BPGM
BRDT
BTF3L4
BTN3A1
BTN3A2
BTN3A3
C10orf35
C11orf58
C11orf86
C14orf159
C14orf37
C16orf87
C17orf97
C1QL1
C1R
C1RL
C1S
C2orf16
C2orf72
C3
C3orf18
C7orf25
C7orf31
C9orf172
CABLES1
CADPS2
CALB2
CALCOCO1
CAPN5
CARD10
CAT
CBL
CBX1
CBX7
CCBE1
CCDC163
CCDC40
CCDC51
CCDC80
CCDC85C
CCDC92
CCNA2
CD151
CD24
CD68
CDA
CDC42EP4
CDCA3
CDHR1
CDK18
CDK2AP2
CDK4
CDKN2B
CDKN2C
CEBPD
CEP164
CERK
CERS6
CFDP1
CFHR1
CFLAR
CGNL1
CHCHD10
CHCHD6
CHD9
CHML
CHMP1B2P
CHST6
CIPC
CIR1
CLCN7
CLMP
CLN6
CLPP
CNIH3
CNNM2
CNNM3
COG7
COL8A2
COMMD1
COMMD9
COQ10A
COQ3
COQ5
COQ8B
CORO2A
CPA4
CPE
CREB3L2
CREBBP
CRTC1
CSGALNACT1
CSPG4
CSRP2
CTHRC1
CTIF
CUL1
CXXC1
CYB5A
CYB5R1
CYB5R2
CYB5RL
CYBRD1
CYP24A1
CYP4F11
DAGLB
DANCR
DAPK1
DAW1
DCBLD2
DDOST
DDX39A
DECR1
DENND4A
DENND4C
DEPTOR
DIRAS1
DLX4
DMBT1
DPY19L4
DRAM1
DSC3
DTD1
DTX2
DTX4
DUSP1
DUSP16
DUSP9
DYSF
E2F1
EDN1
EEA1
EFNA3
EFNB3
EGR1
EHD2
EIF3K
EIF4B
EIF4EBP2
EIF4G3
ELFN2
ELMO2
ELMOD1
EML3
ENHO
ENKD1
ENPEP
ENPP2
ENTPD5
EOGT
EPB41L1
EPHB3
EPN1
ESRRA
ETHE1
ETV7
EVI5L
EVL
EXOC6B
EXTL2
F3
FADS3
FAF1
FAM126A
FAM171A2
FAM214A
FAM217B
FAM229B
FAM32A
FAM50B
FAM53B
FAM78A
FAM83A
FAM86C2P
FBF1
FBLN1
FBLN5
FBLN7
FBP1
FCF1P2
FGFR2
FGFRL1
FHDC1
FIGN
FLT3LG
FLVCR2
FMN2
FOS
FOSB
FOXN3
FOXO4
FOXP4
FPGT
FRMPD1
FSTL3
FTL
FUNDC2
FYCO1
GABRD
GADD45B
GAL3ST1
GAS7
GAS8
GATA2
GBP2
GCNT3
GDF11
GDPD5
GFPT2
GGA1
GGCT
GGT5
GHDC
GHR
GK
GLIPR2
GLP2R
GLTSCR1L
GMPR2
GNAO1
GNB1
GNG5
GNG7
GPAT3
GPATCH4
GPBP1L1
GPD2
GPR153
GPRC5B
GRK4
GRPR
GYG2
HADH
HCFC2
HDGFRP2
HECW1
HEXIM1
HEXIM2
HHIPL2
HINFP
HIRIP3
HLA-DRB5
HMG20A
HMG20B
HMGN3
HMOX1
HOMER2
HOXC10
HOXC13
HOXC8
HPDL
HSPB1
ICAM1
ID1
ID2
IER5L
IFI27
IFI35
IFITM1
IFITM2
IFITM3
IGFBP3
IGFBPL1
IGSF3
IKBKAP
IKZF2
IL17RC
IL27RA
IL6
ILDR2
IMPDH2
INIP
INPP5F
INSIG1
INTS14
INTS3
IQGAP2
IQSEC1
IRF9
ITGBL1
JADE2
JAG2
JPH1
JUNB
KAT2B
KATNB1
KCNC3
KCNF1
KCNH1
KCNQ3
KIAA0100
KIAA0408
KIAA1191
KIAA1211
KIF13A
KIF15
KIF20A
KIF26B
KIF5B
KIZ
KLB
KLF13
KLHL22
KRCC1
KRT4
KRT7
LACTB
LACTB2
LAMP3
LGALS3BP
LGSN
LHFP
LIMK1
LINC00346
LINC00648
LINC00654
LINC00842
LINC01508
LMAN2L
LMBRD2
LMO3
LMO7
LMTK3
LOC100130992
LOC100288637
LOC100507599
LOC101930085
LOC257396
LOC730101
LOC730102
LOC90246
LRP11
LRRC6
LRRC61
LRRC8A
LRRC8D
LRRFIP1
LRRN2
LSM6
LTBP3
LTBR
LY6E
LYRM2
LYSMD3
LZTR1
LZTS1
MAN1C1
MAOA
MAP3K6
MAP4K4
MAP7D3
MARK3
MARK4
MATN2
MAVS
MECP2
MEIS1
METAP1D
MEX3A
MFF
MFHAS1
MFSD14A
MGAT5
MGLL
MID1
MIDN
MINDY1
MIPEP
MLLT1
MLLT6
MMP15
MPP7
MR1
MRPL10
MRPL16
MRPL18
MRPL44
MRPS10
MSANTD2
MSI2
MSN
MTA2
MTRR
MUC1
MUC20
MX2
MXRA8
MYLK
MYO18A
MYO1G
MYO9B
MYRF
NAA10
NABP2
NAPSA
NAT14
NCOA2
NCOA3
NCOA7
NDNF
NDRG2
NEK9
NES
NEURL1B
NFATC1
NFATC4
NFE2
NFIX
NFYA
NGF
NINJ1
NIPA1
NKAPP1
NKRF
NKX2-1
NMNAT3
NNMT
NOTCH3
NPR1
NR0B1
NR4A3
NRCAM
NRG1
NSMCE2
NUDCD3
NUDT11
NUDT2
NUMA1
OCRL
OGFR
OGFRL1
OLFML2A
OMA1
OS9
OSBP
OXA1L
P2RY6
PAIP1
PALM
PARP14
PARP16
PBX1
PBXIP1
PCBP3
PCDHB13
PCDHB14
PCDHB2
PCDHB5
PCLO
PCSK1N
PCSK7
PDCD4
PDCD4-AS1
PDE2A
PDE9A
PDIA4
PDK2
PGPEP1
PHACTR4
PHF2
PHF20
PHLDB2
PHOSPHO1
PHYHIP
PID1
PIF1
PIGN
PIGS
PIH1D1
PIK3R3
PIMREG
PITPNM2
PLCB4
PLCD1
PLEKHA4
PLEKHA7
PLEKHG4
PLEKHM3
PLGRKT
PLOD1
PLXNB2
PNRC1
POC1A
POLR3D
POU6F1
PPARA
PPFIBP2
PPM1J
PPP1R16B
PPP1R3C
PRADC1
PRAG1
PRCP
PRDM4
PRDX1
PRDX3
PREX1
PRPF4
PRSS12
PRX
PSG1
PSG5
PSG9
PSTPIP2
PTCH1
PTGFRN
PTMS
PTPA
PTPRE
PTPRF
PTPRS
PTPRU
PYCR1
R3HDM2
RAB11FIP1
RAB27A
RAB3B
RABL6
RAMP1
RANBP10
RAPGEF2
RARG
RASGEF1C
RASL10B
RBM23
RBMS3
RCCD1
RCN3
RDH11
REEP6
RETREG3
RFLNA
RFXAP
RGS3
RGS9
RHOBTB1
RHOU
RHOV
RIMS4
RNASEL
RND2
RNF135
RNF149
RNMT
RPL26L1
RPS28
RPS29
RPS6KA5
RPUSD4
RRAGD
RUNX3
S100A9
SAC3D1
SAE1
SDK1
SEC23A
SEL1L
SELENON
SEMA6B
SEMA6C
SERPINB1
SERPING1
SERTAD1
SFXN3
SGK2
SH2B1
SH3GL3
SH3PXD2B
SH3RF1
SHPK
SIPA1L2
SLC1A1
SLC22A31
SLC25A12
SLC25A20
SLC25A24
SLC25A42
SLC25A46
SLC29A3
SLC30A1
SLC33A1
SLC35D2
SLC35E2
SLC35E2B
SLC35F6
SLC38A3
SLC39A8
SLC43A2
SLC44A1
SLC44A2
SLC6A3
SLC6A6
SLC9A3R2
SLCO2A1
SLFN12
SMAD1
SMARCC1
SMARCD2
SMARCE1
SMOC1
SMPD1
SNAI1
SNHG19
SNHG9
SNX25
SNX29
SNX8
SOAT1
SOCS3
SORBS1
SOX12
SP110
SP140L
SP4
SPINK2
SPTLC1
SRGAP1
SRGAP3
SSBP3
SSR4P1
ST3GAL3
ST3GAL5
ST6GAL1
ST6GALNAC2
ST6GALNAC3
STARD10
STARD8
STEAP3
STK10
STK36
STON2
SUGCT
SUN2
SUOX
SURF2
SUSD3
SUSD5
SWI5
SYT12
SYT13
SYT3
SYT7
TAB1
TACSTD2
TAF12
TAPT1-AS1
TBC1D16
TBC1D2
TBC1D22A
TBXA2R
TCF7
TCTN3
TEAD2
TEX36
TFEB
TGFB3
TGFBI
THBD
THEM6
TIAM1
TKT
TLE2
TLK1
TLR3
TLR5
TMEM106C
TMEM117
TMEM150C
TMEM2
TMEM215
TMEM246
TMEM266
TMEM37
TMEM63C
TMIE
TMTC2
TNFRSF10C
TNRC6C
TOB1
TOR2A
TRAF5
TRAM1
TRAM1L1
TRANK1
TRIM14
TRIM16
TRIM16L
TRIM44
TRIM7
TRMU
TRUB2
TSPAN12
TSPAN2
TSPAN6
TTC23
TTC5
TTYH2
TUBB4A
TULP3
TXNDC11
TXNDC16
TXNRD1
UBAP2
UBE2D1
UBE2E1
UBE2L6
UBE2Q2
UBXN11
UGP2
UNC5A
UNC93B1
UPF2
UPK3B
UQCRHL
USH1C
USP18
USP6NL
UXS1
VANGL2
VOPP1
VPS18
VSIR
VWA1
VWA5A
WDTC1
WFDC21P
WHRN
WIPF2
WNT7B
WSCD1
WWC3
XPO6
XYLB
YPEL2
YPEL3
ZCCHC2
ZCCHC24
ZDHHC14
ZDHHC9
ZER1
ZFP1
ZFP90
ZHX3
ZMIZ1
ZMYND10
ZMYND11
ZNF181
ZNF252P
ZNF263
ZNF302
ZNF330
ZNF488
ZNF503
ZNF516
ZNF594
ZNF618
ZNF658B
ZNF704
ZNRF1
ZP3
ZSCAN30
ZSCAN5B
ZSWIM6
