# Supplementary material for: PHF19 mediated regulation of proliferation and invasiveness in prostate cancer cells
Source: eLife. 2020 Mar 10;9:e51373. doi: 10.7554/eLife.51373 (PMC7064337; doi:10.7554/eLife.51373)
Supplement: Supplementary file 3. [file elife-51373-supp3.xlsx]

## Sheet: primers_shRNAs
Primers for RT-qPCR
Gene	Forward primer sequence (5' to 3')	Reverse primer sequence (5' to 3')
AATF	CTTGGACACGGACAAAAGGT	CACACTCCTGTTCCTCAGCA
ANGPTL4	GCCTATAGCCTGCAGCTCAC	AGTACTGGCCGTTGAGGTTG
CCNA2	TTATTGCTGGAGCTGCCTTT	GGTCTGGTGAAGGTCCATGA
CCNB1	GAACAACTGCAGGCCAAAAT	CACTGGCACCAGCATAGGTA
CCND1	CCTAAGTTCGGTTCCGATGA	ACGTCAGCCTCCACACTCTT
CDK4	GAAACTCTGAAGCCGACCAG	AGGCAGAGATTCGCTTGTGT
CDKN1A	GCAGACCAGCATGACAGATT	AAGATGTAGAGCGGGCCTTT
CXCR4	CCGTGGCAAACTGGTACTTT	GACGCCAACATAGACCACCT
DUSP10	GCGGCAGTACTTTGAAGAGG	ATTGGTCGTTTGCCTTTGAC
DUSP4	CCTCTACTCGGCGGTCATC	TCTGGGTACTCGGAGGAAAA
DUSP5	ATCAGCCAGTGTGGAAAACC	GAGACATTCAGCAGGGCTGT
DUSP6	ATGGTAGTCCGCTGTCCAAC	ATTCCTCCAACACGTCCAAG
E2F1	CACAGATCCCAGCCAGTCTC	GAGAAGTCCTCCCGCACAT
HIF1A	TCAAGCAGTAGGAATTGGAACATT	TGCTCCATTCCATTCTGTTCACT
HMGA1	TCACTCTTCCACCTGCTCCT	TTGTTTTTGCTTCCCTTTGG
JARID2	AGGCATGGATGGAACCTCAC	ATGCAATACCAAATGCAGTCAG
LOX	CCCCAAAGAGTGAAAAACCA	CCTTCAGCCACTCTCCTCTG
MET	CAGGCAGTGCAGCATGTAGT	CTCGGTCAGAAATTGGGAAA
MTF2	AGGCCCTGGAGACTGGTATT	CAAACAGCATTGGCTTCTGA
MMP1	GGTCTCTGAGGGTCAAGCAG	AGTTCATGAGCTGCAACACG
PHF1	TTGAATGCTGTGTGTGTCGC	TACAGGACAAGATGGGCCAC
PHF19L	CGTGAAGATGGTGCTGTCCT	TGGAACCACTGCCTGCAC
PHF19S	GCAGACCAGAGACTCCCATCAC	GAGGCGCTATCTGTCTCCAAAG
PLAU	TGTGAGATCACTGGCTTTGG	GTCAGCAGCACACAGCATTT
PLAUR	GCCTTACCGAGGTTGTGTGT	CATCCAGGCACTGTTCTTCA
SOX4	CCAGCAAGAAGGCGAGTTAG	CGGAGCCTTCTGTCTTCATC
VEGFA	CCCACTGAGGAGTCCAACAT	TTTCTTGCGCTTTCGTTTTT
VEGFC	AGAGAACAGGCCAACCTCAA	TGGCATGCATTGAGTCTTTC
RPLP0	TTCATTGTGGGAGCAGAC	CAGCAGTTTCTCCAGAGC
Primers for ChIP-qPCR
Gene	Forward primer sequence (5' to 3')	Reverse primer sequence (5' to 3')
ATF3	GTGGGTGGTCTGAGTGAGGT	CACAGTTTGGTAATTTGGGGTAG
DUSP4	GGACTGTGGGGGTCTATCTAATAA	AAAGCCTTTGTAAAGGAATCAGTG
EGLN3	AGGGACAGGAGGAAGCTGAT	AATTGCCCTGGAGTACATCG
MLLT6	AAACTCGTGCATGATTTAGGAC	ACAAGACACAGAGGAGAAACTGC
IGFBP3	TGCACTTAGAGAATCGAGCAAGT	CGCTTTTCTTCTCACTGGAGATA
CYP24A1	GCCGTAGATGTCACCAGTCTC	ACTAGCACCTCGTACCAACCTC
EFNA3	TCTCTGTGTTTTCTCCCAGTCTC	AGAGAACGAGAACCGAGAGTCTT
CBX4	TCCCCTGGAAAATCTGTTTG	GGCAGCAACAGAAAAGATCC
GATA2	ATAATTTTAAATGCCCCGTTTTC	CCCTTTATCCTGTGTGACTGG
Intergenic (Int_14)	ACAGGATAAAGTTGGCATAACCA	CAACAAAACCGTTTGGAATACAT
Positive_Fly_SpikeIn_Control	CTCCTTCAGGCGATTCAGTC	TATCCGGTGTTCATCGTGAG
shRNA	Sequence
shPHF19S#55	CCCAGAGACTCCCATCACAGAG
shPHF19S#168	ACCTCAGTTTCCTCAACTGTAA
shPHF19L#1	AAAGTGATTGTCCATTTCAGG
shPHF19L#4	GCCACACATTTGAGAGCATCA
shPHF19L#B	AACTCTGTTTATCTGTTCTCT

## Sheet: Antibodies
Antibodies
PHF19 (Cell Signaling #77271)
EZH2 (Cell Signaling #5246)
SUZ12 Abcam #ab12073)
H3K27me3 (Millipore #07-449)
MTF2 (Proteintech 16208-1-AP)
JARID2 (Novus #NB100-2214)
control IgG (Abcam #ab172730)
EPOP (Active Motif #61753)
PALI1 was generated in Adrian Bracken's laboratory (Mol.Cell 2018; 70:1-14)
